# Supplementary material for: Convergent de novo synthesis of vineomycinone B2 methyl ester
Source: Royal Society of Chemistry journal article supplement (doi:10.1039/c3cc44050h), 2013-01-01

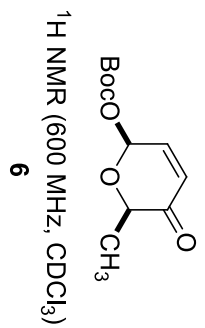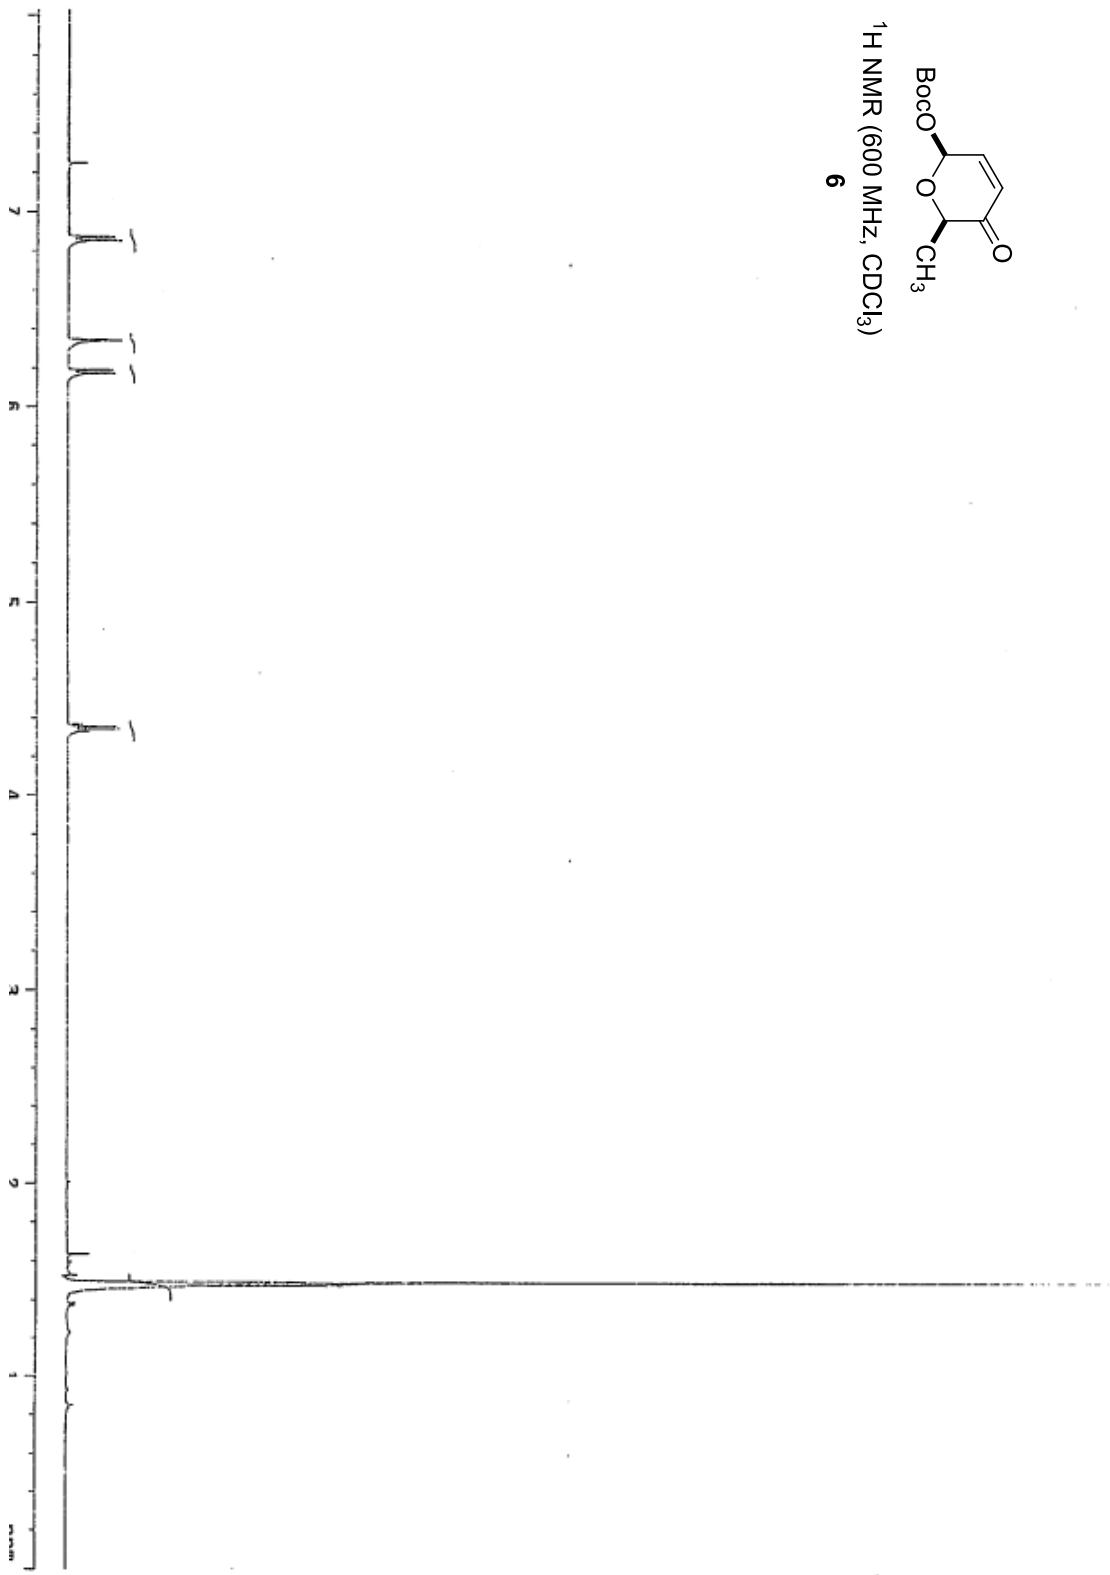

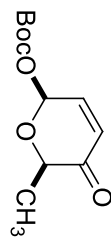

<sup>13</sup>C NMR (150 MHz, CDCl<sub>3</sub>)

6

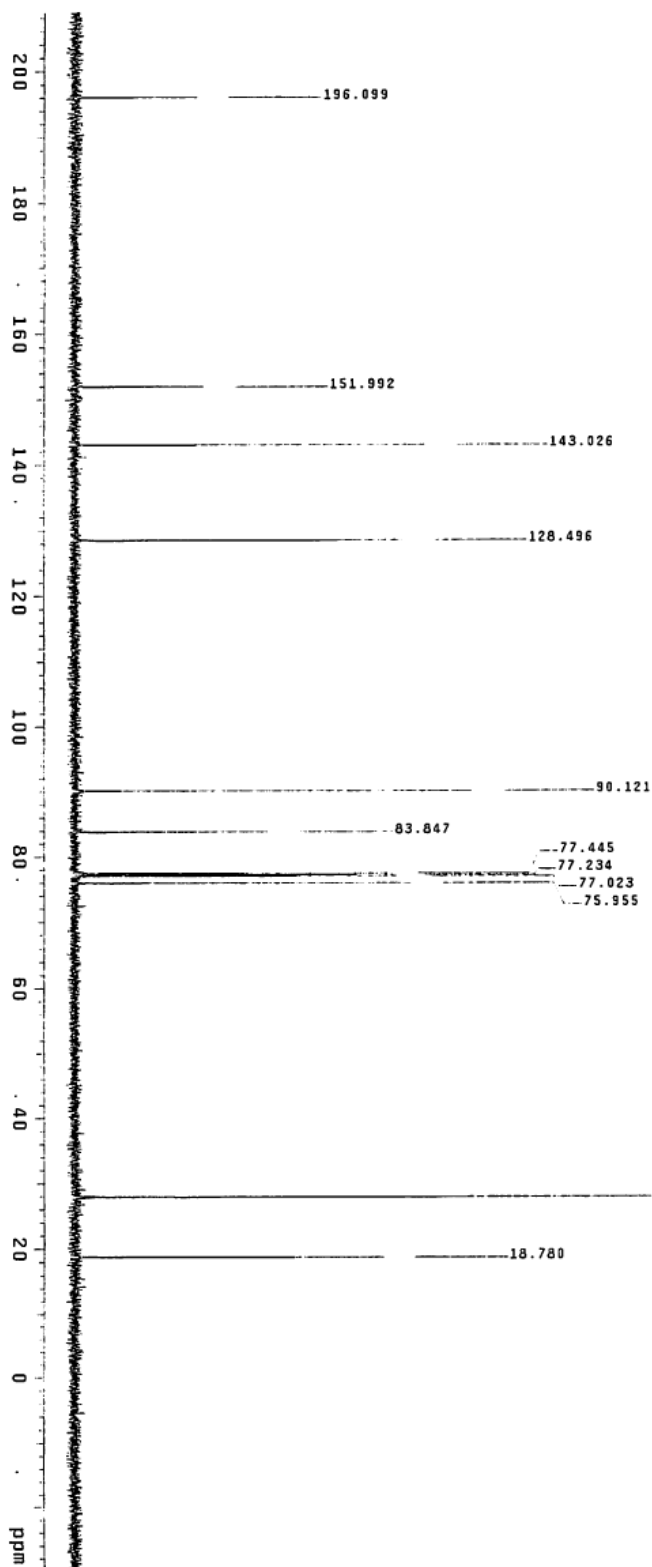

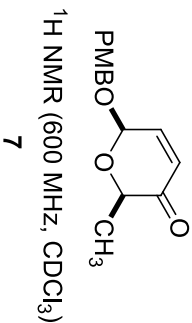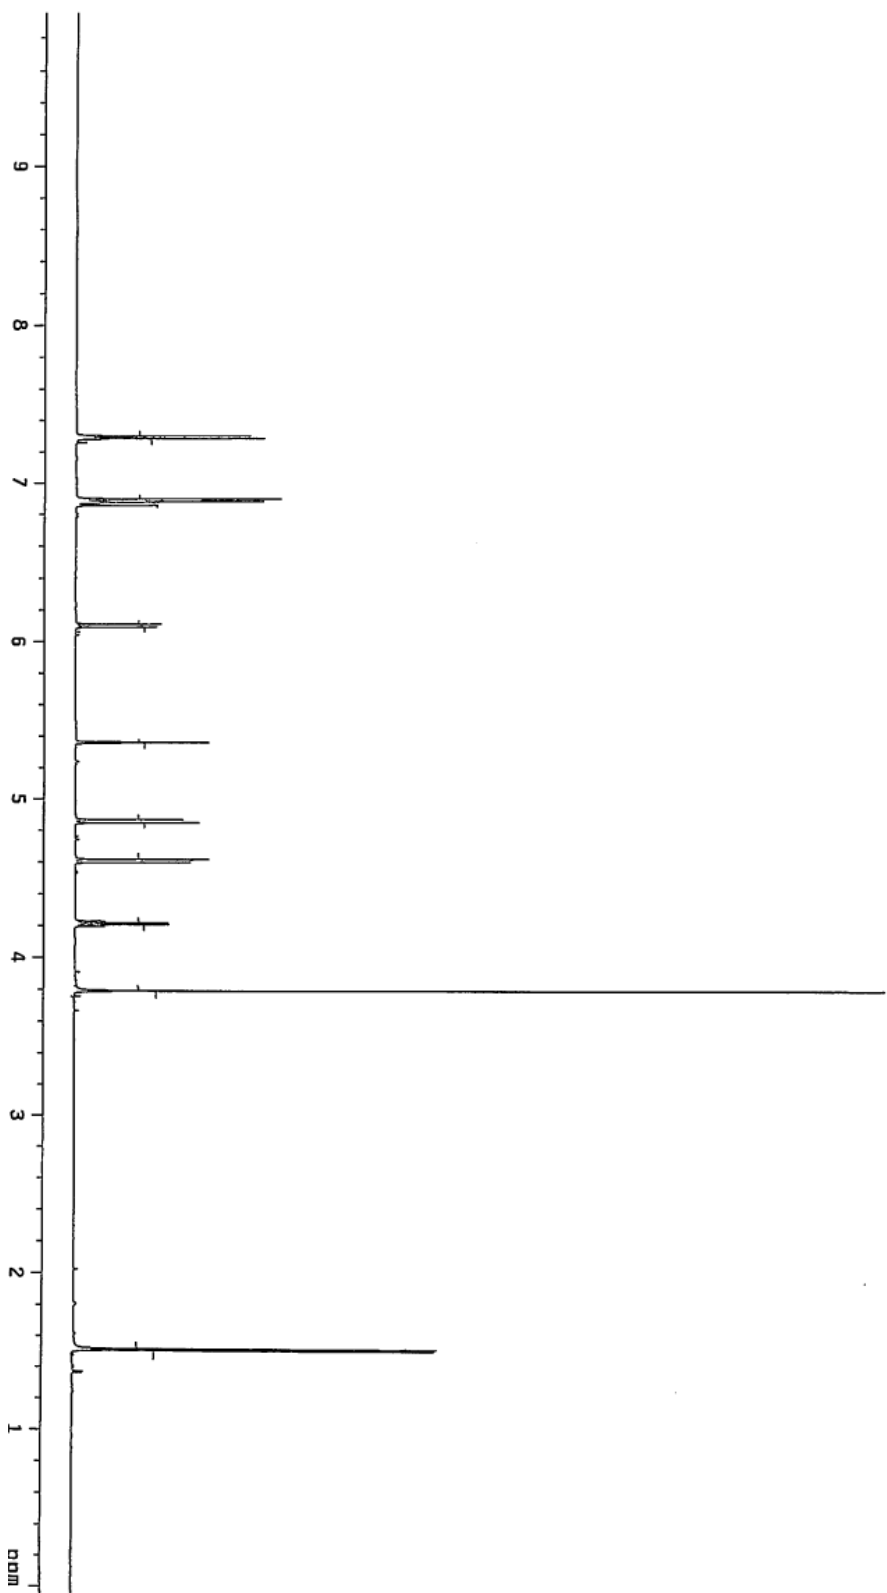

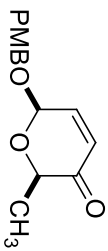

<sup>13</sup>C NMR (150 MHz, CDCl<sub>3</sub>)

7

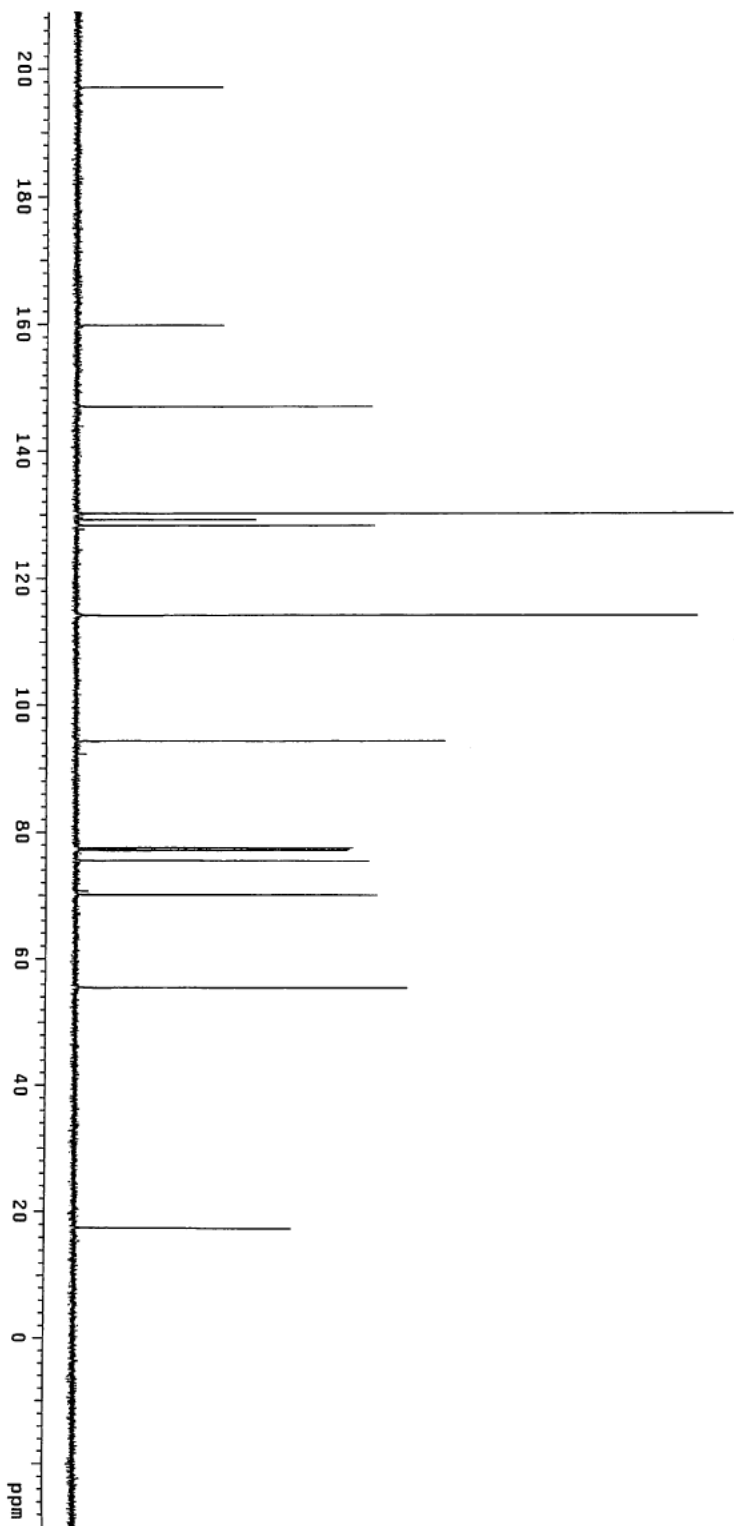

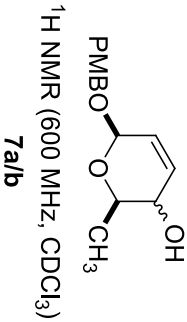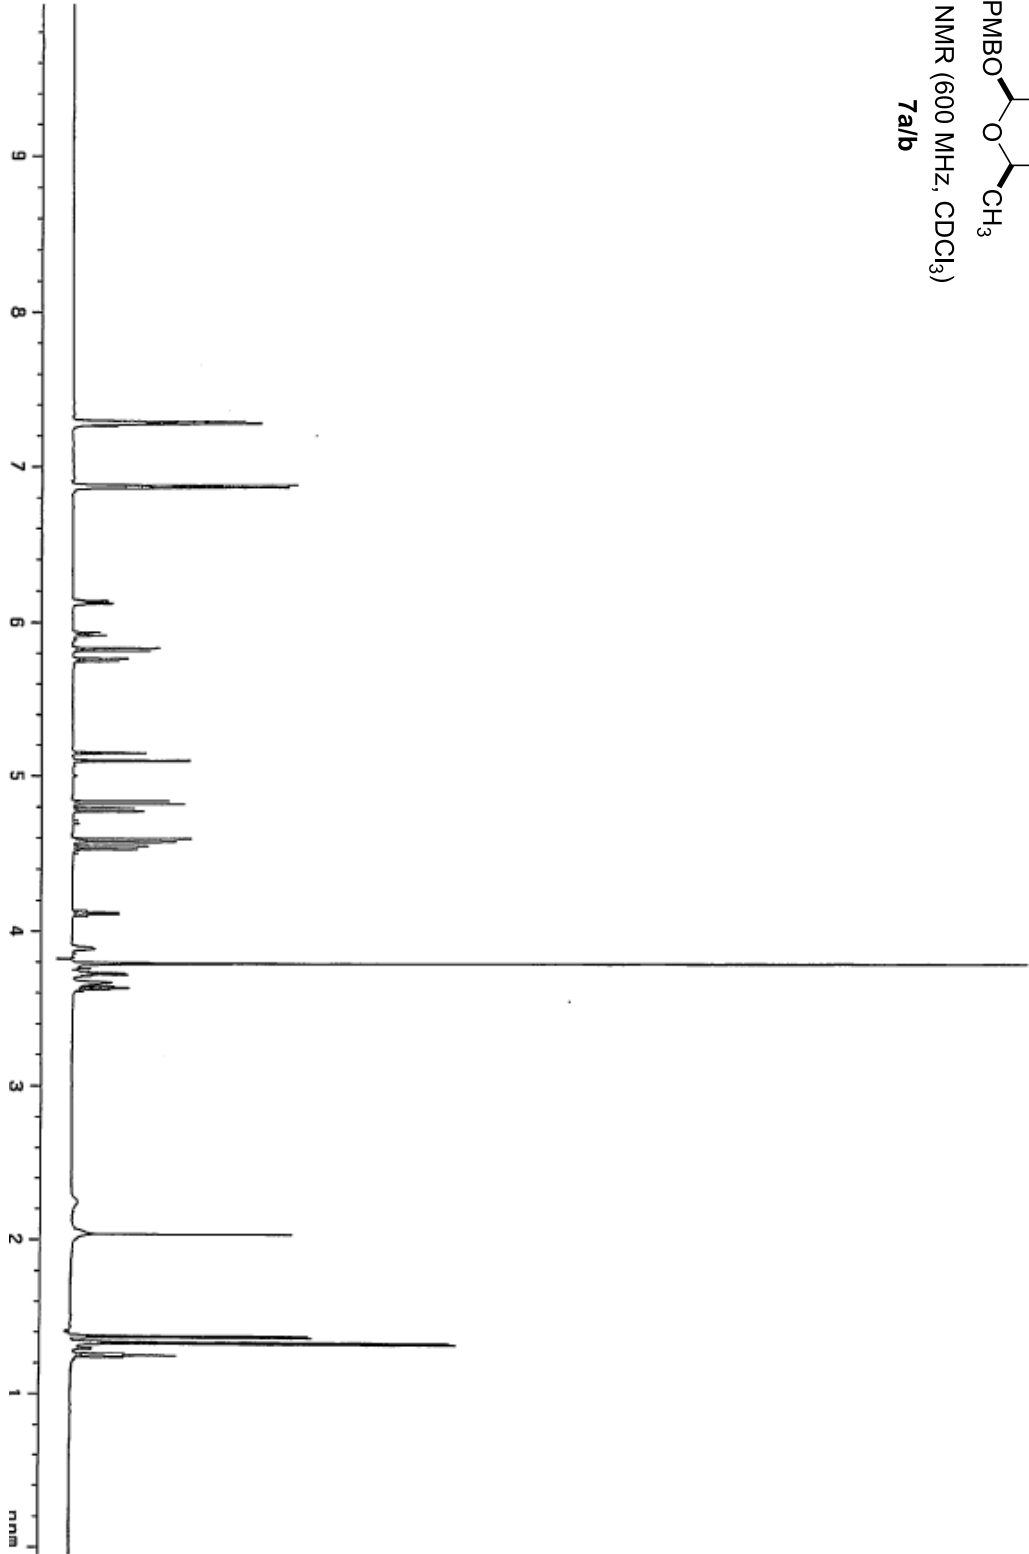

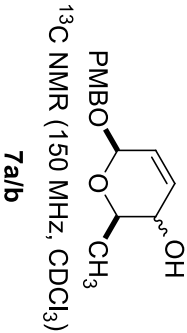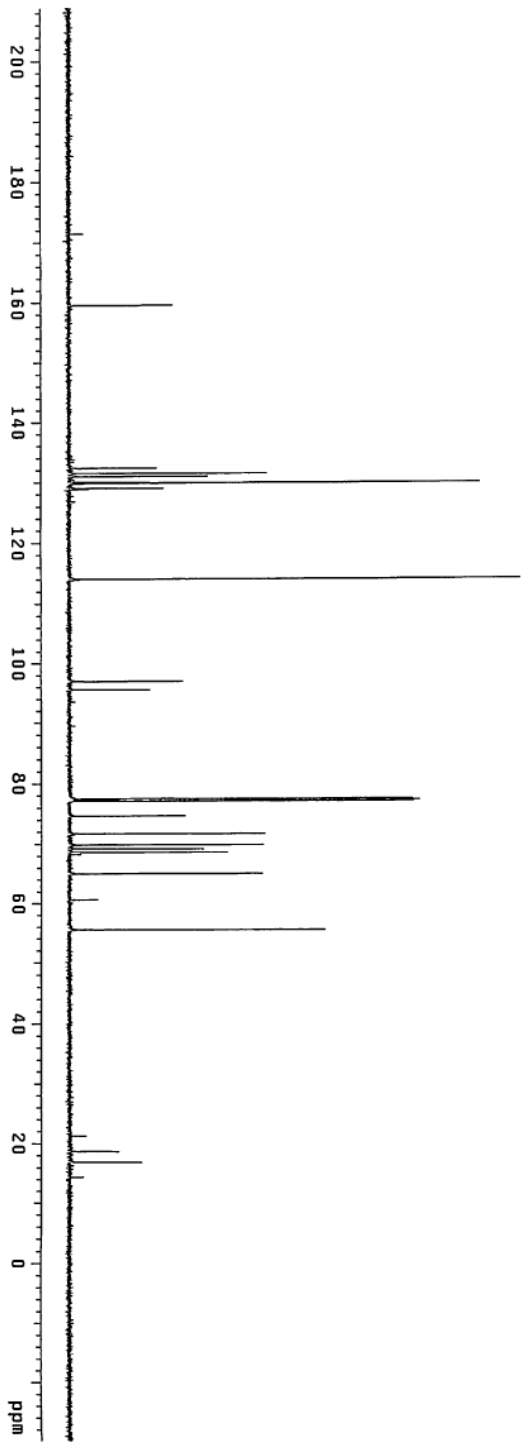

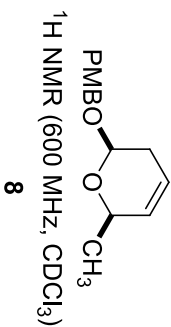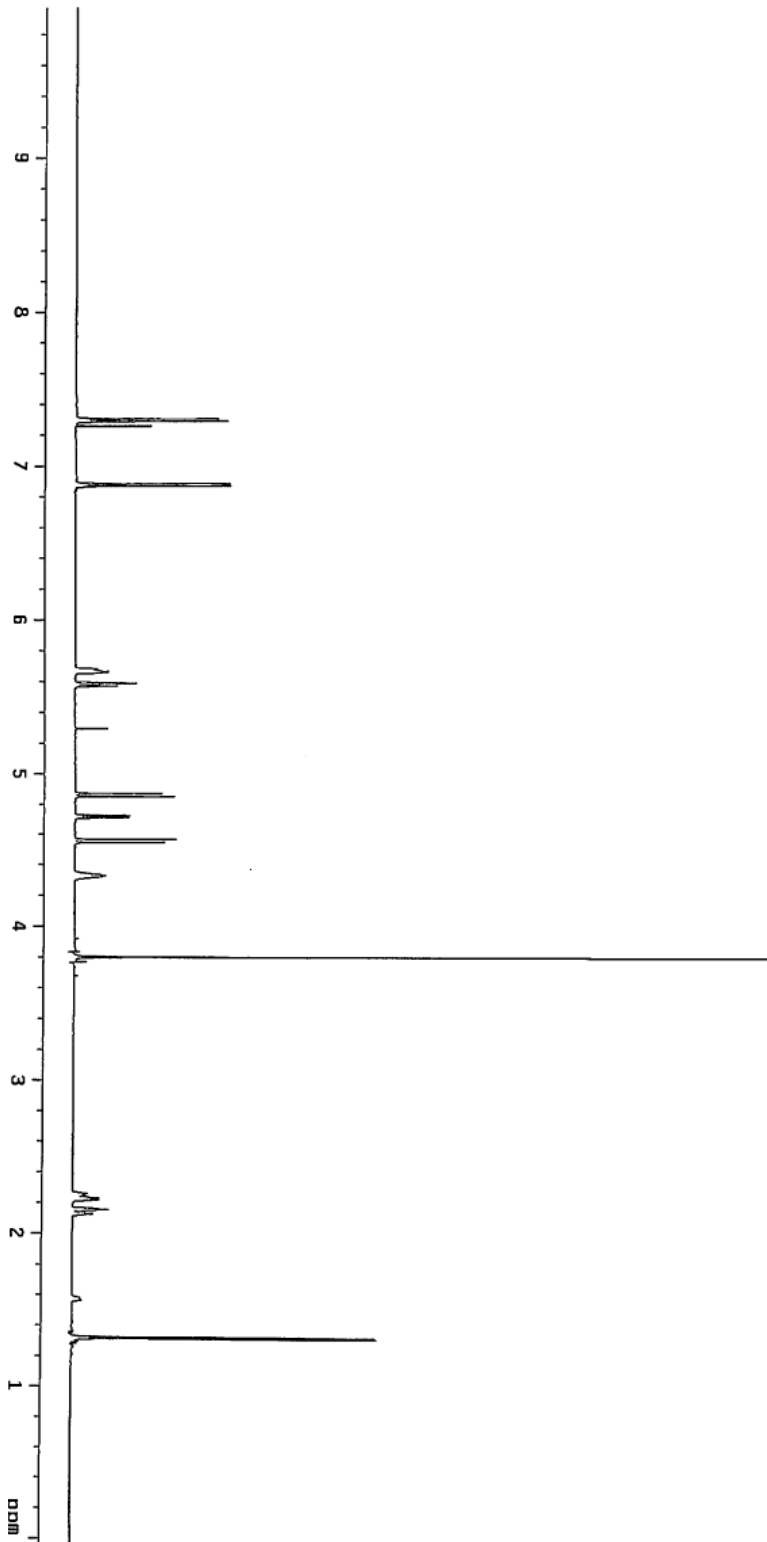

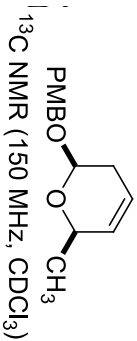

8

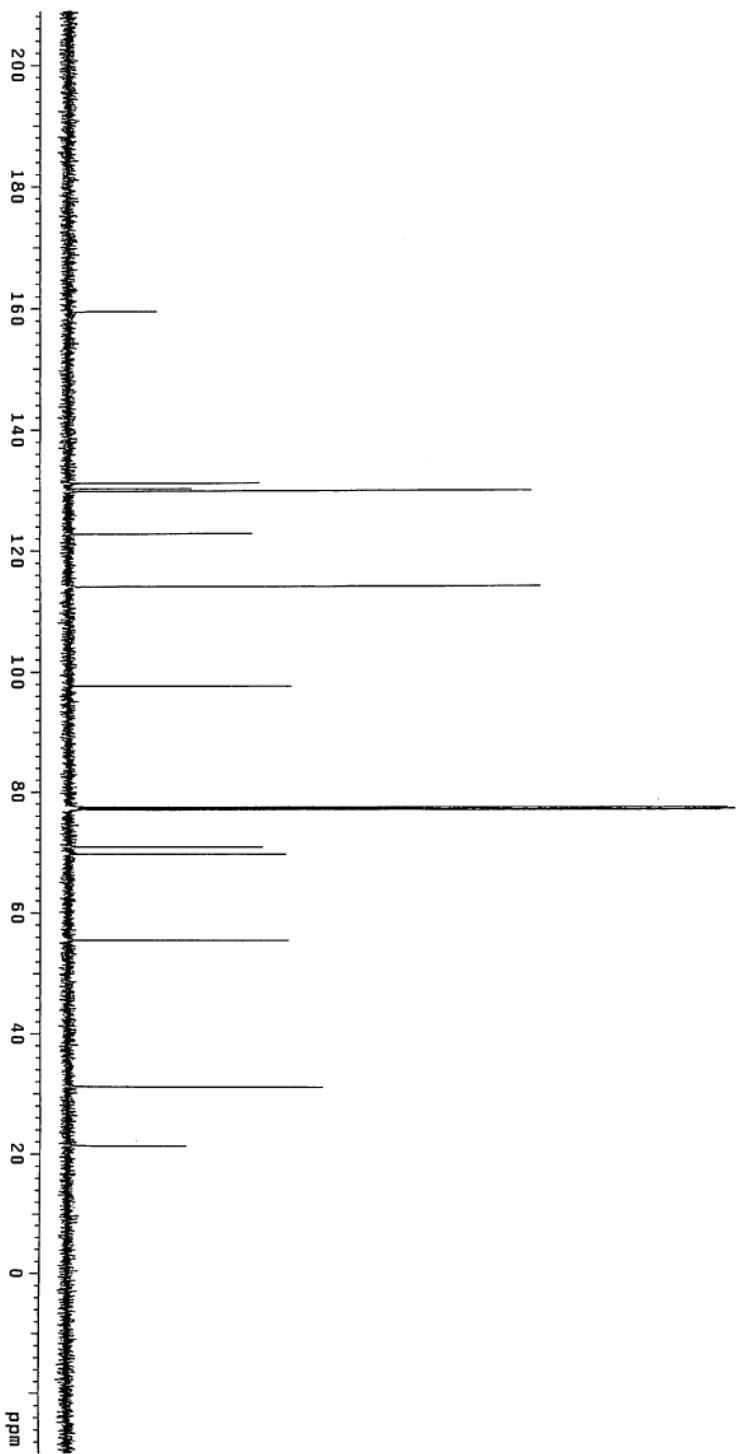



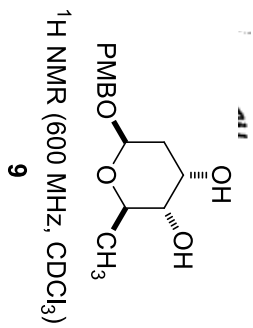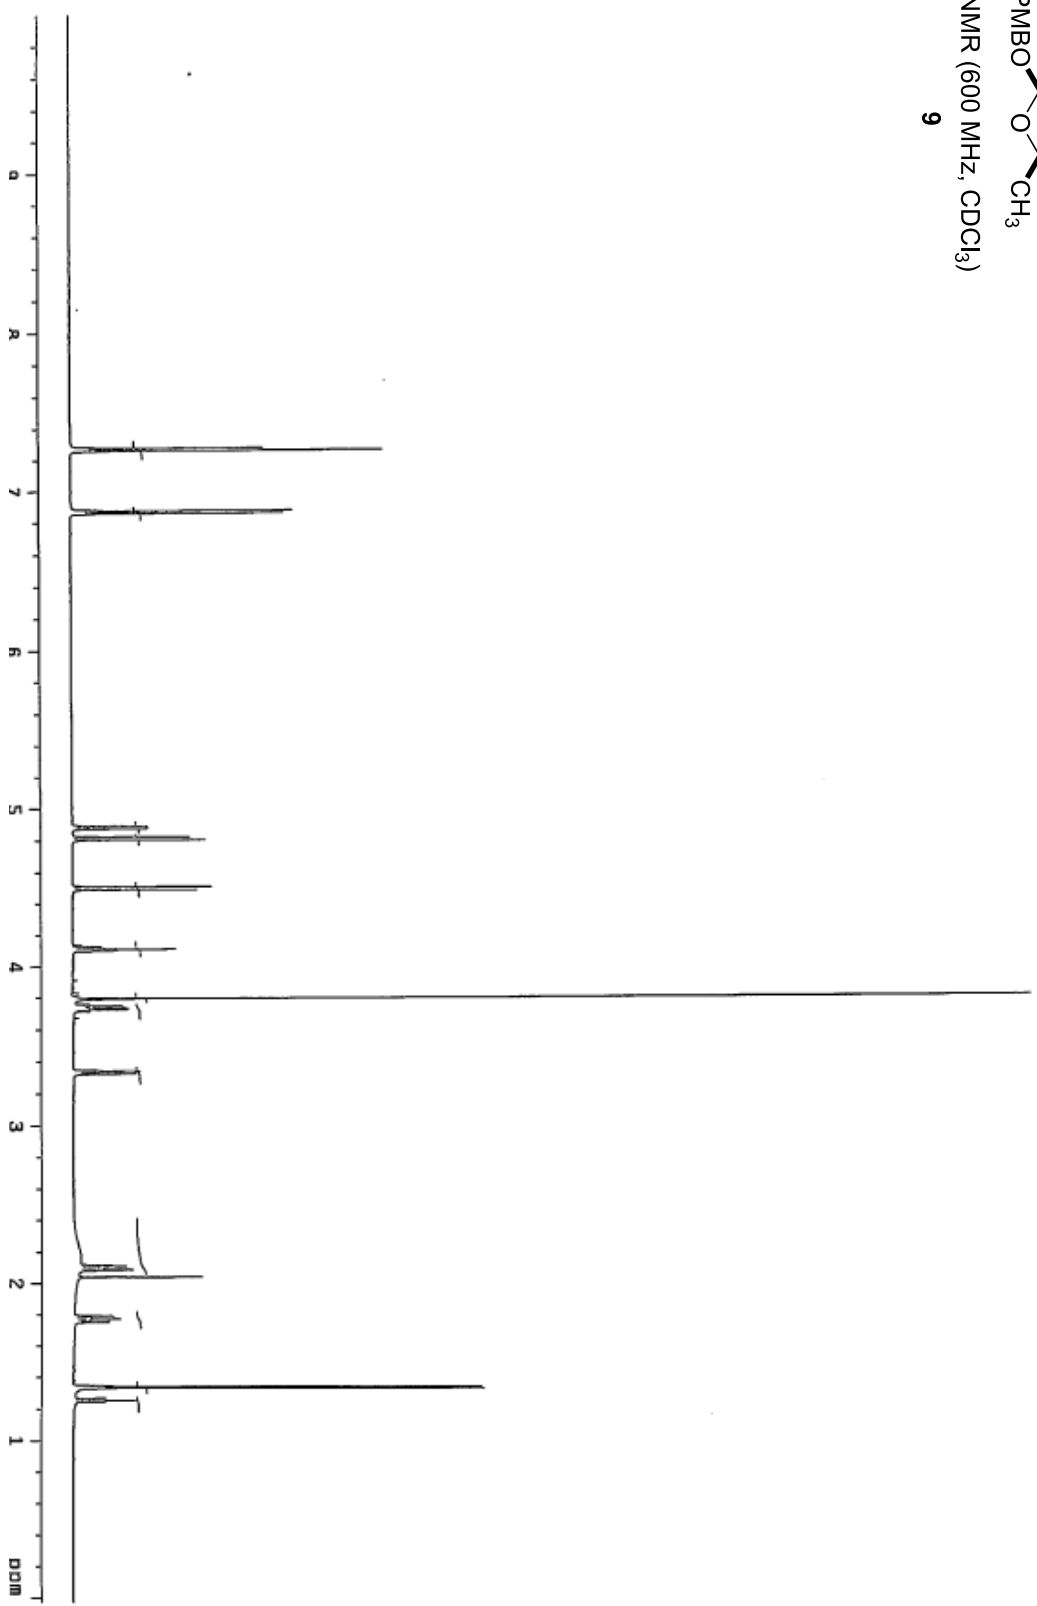

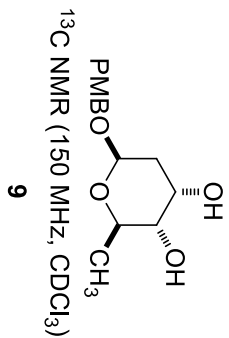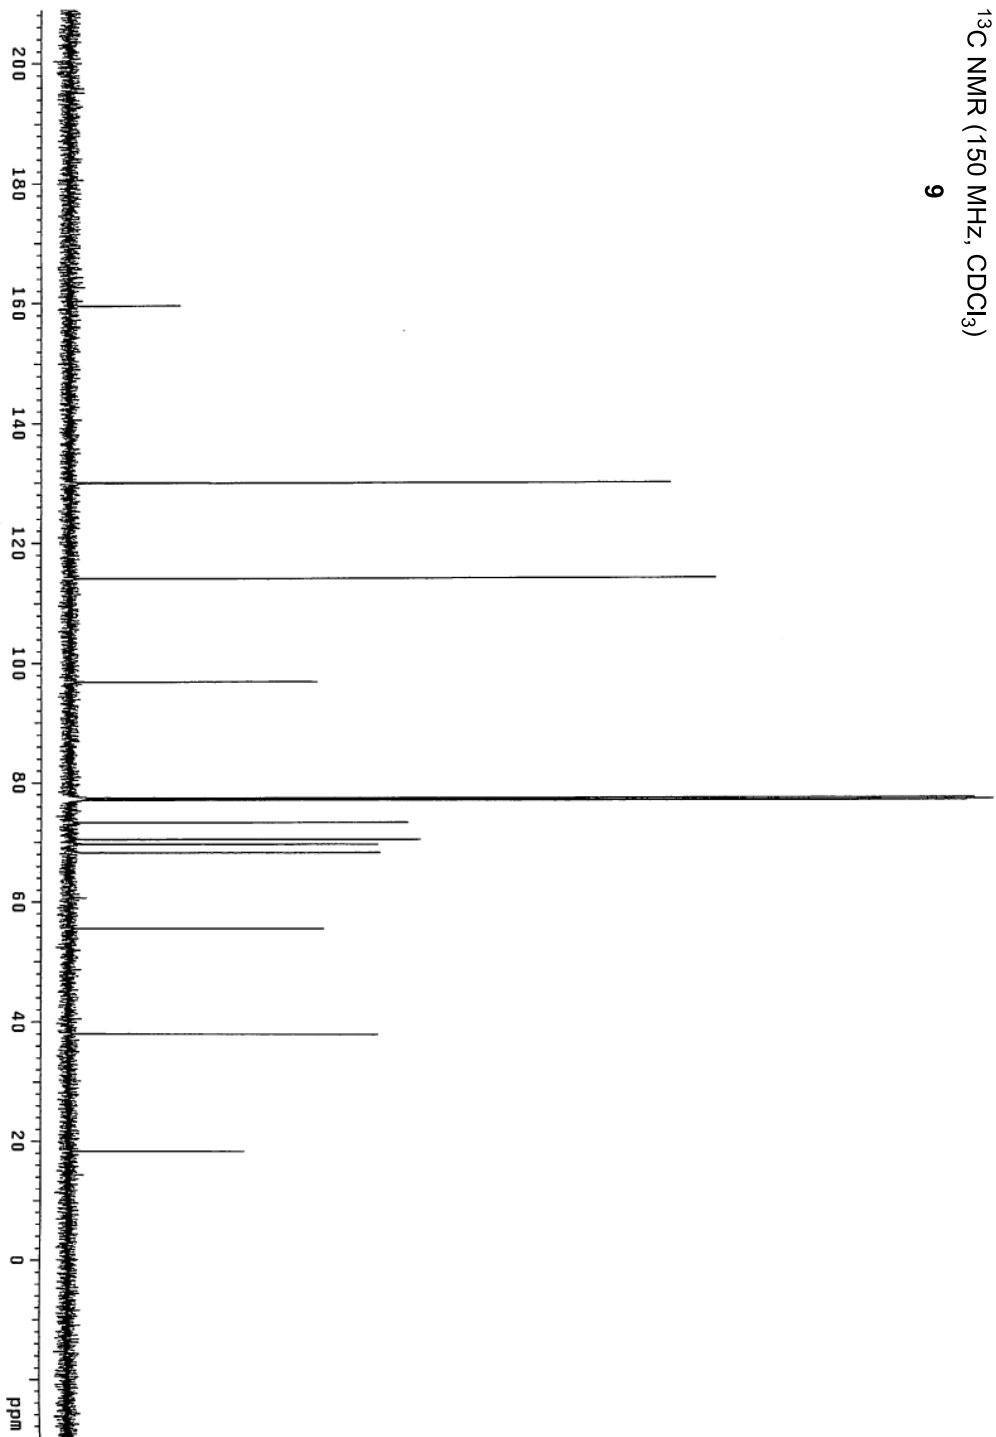

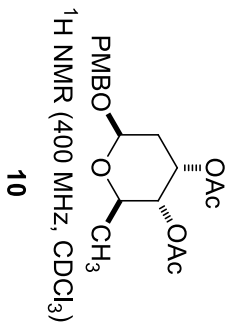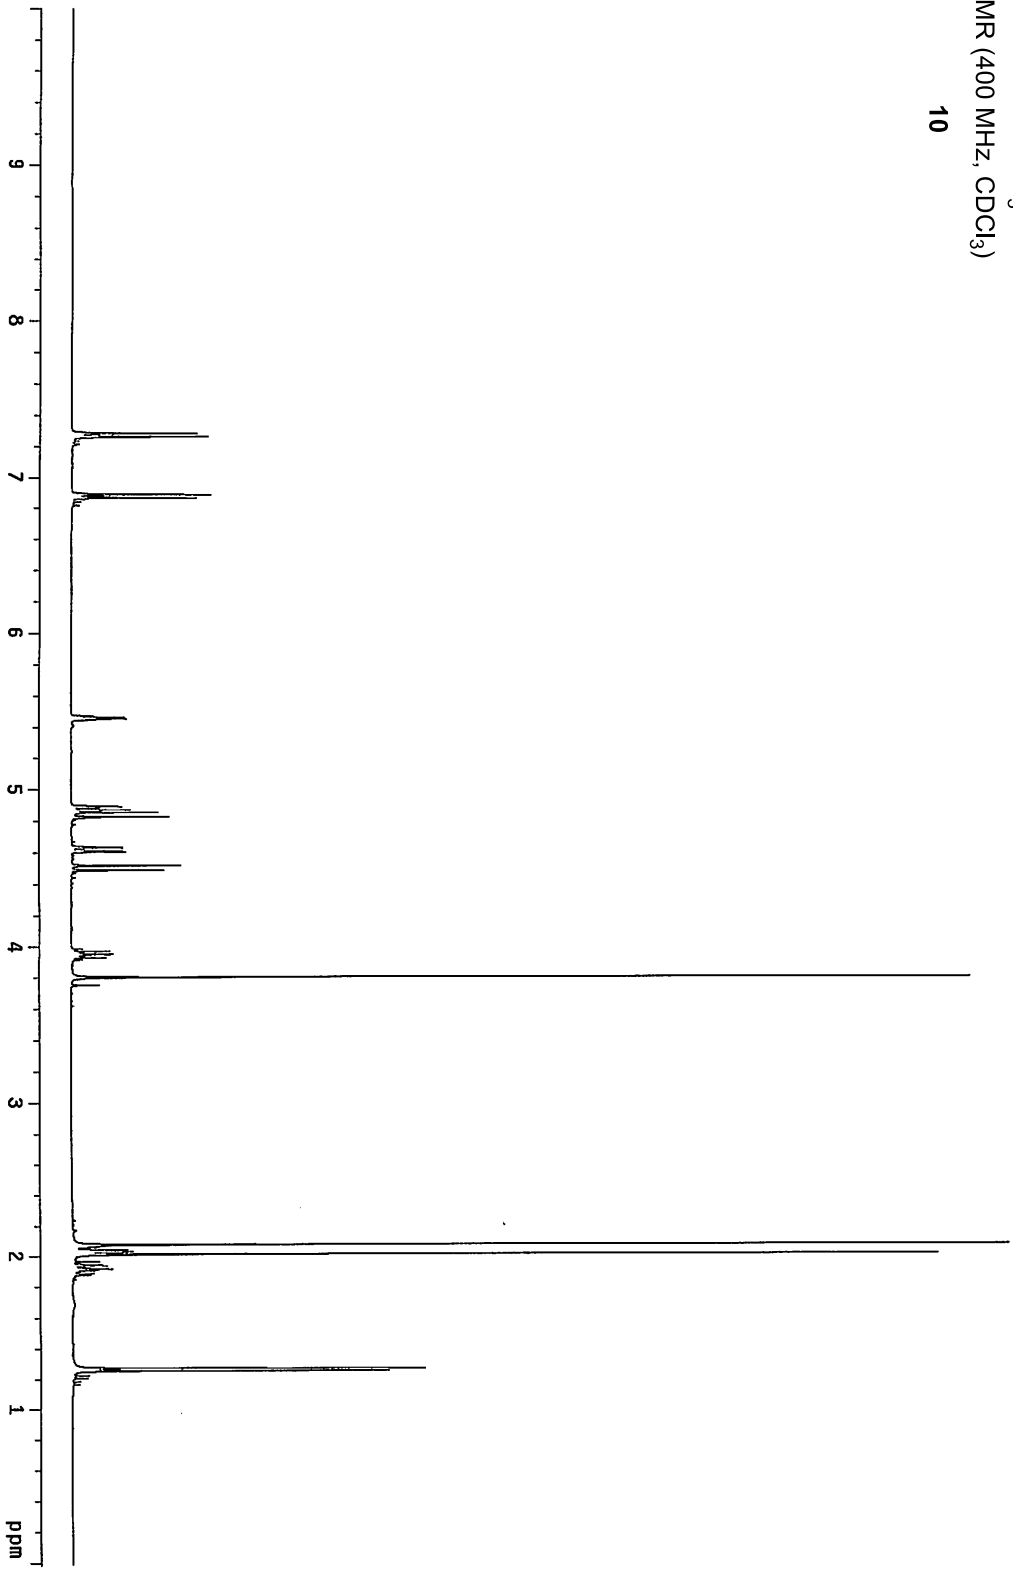

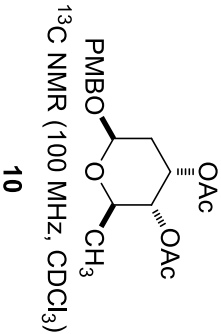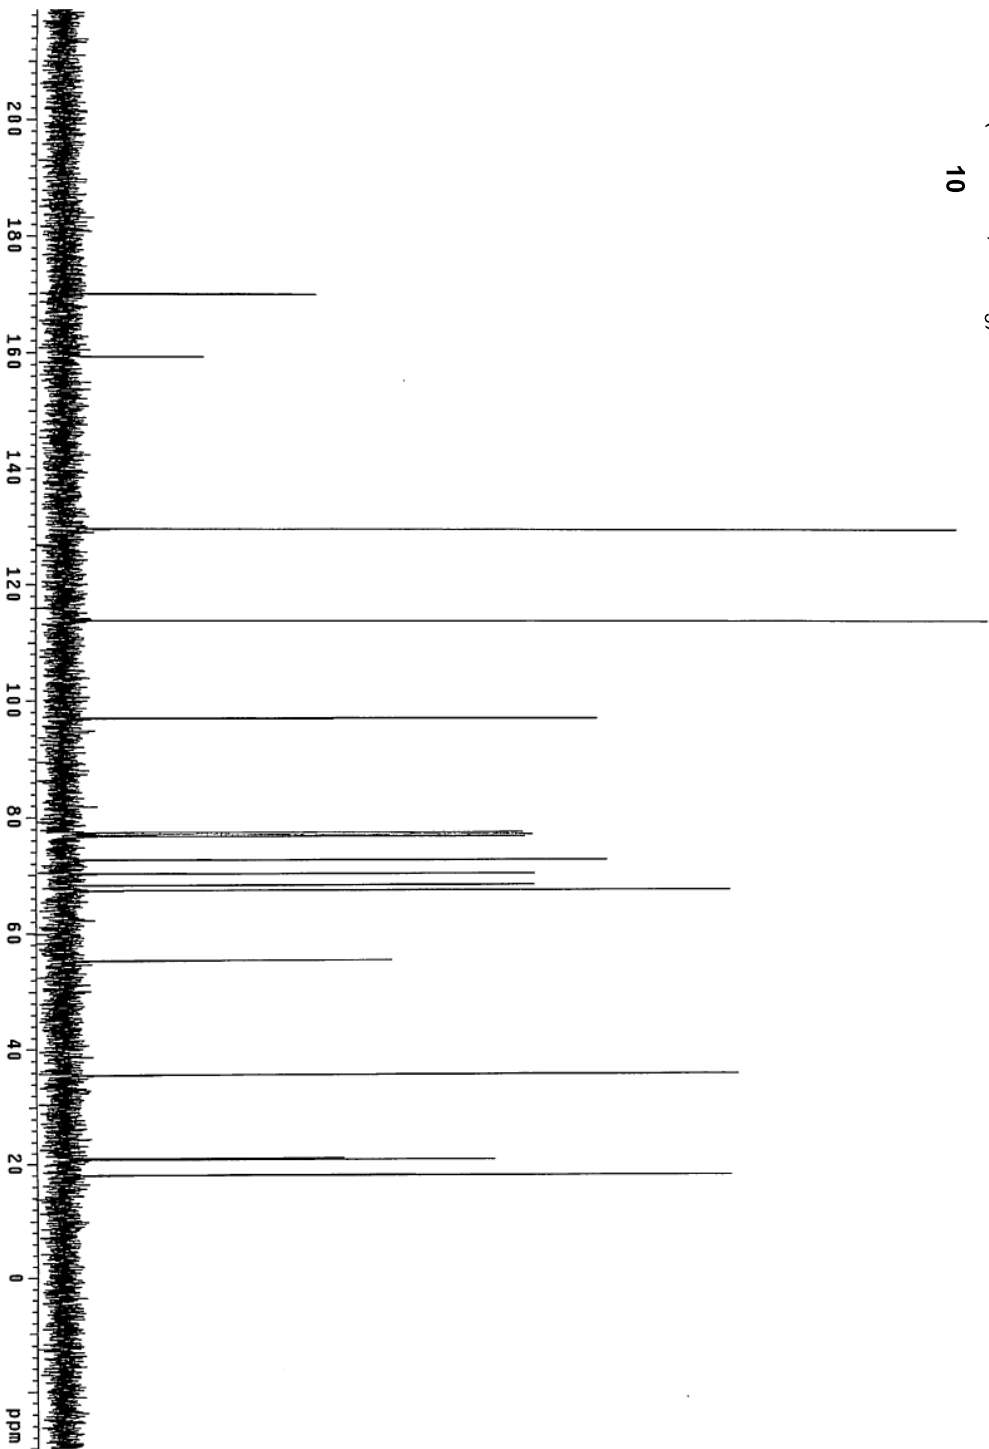

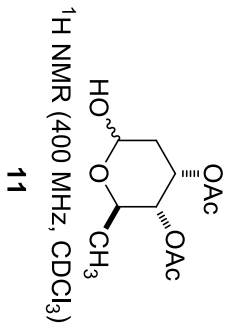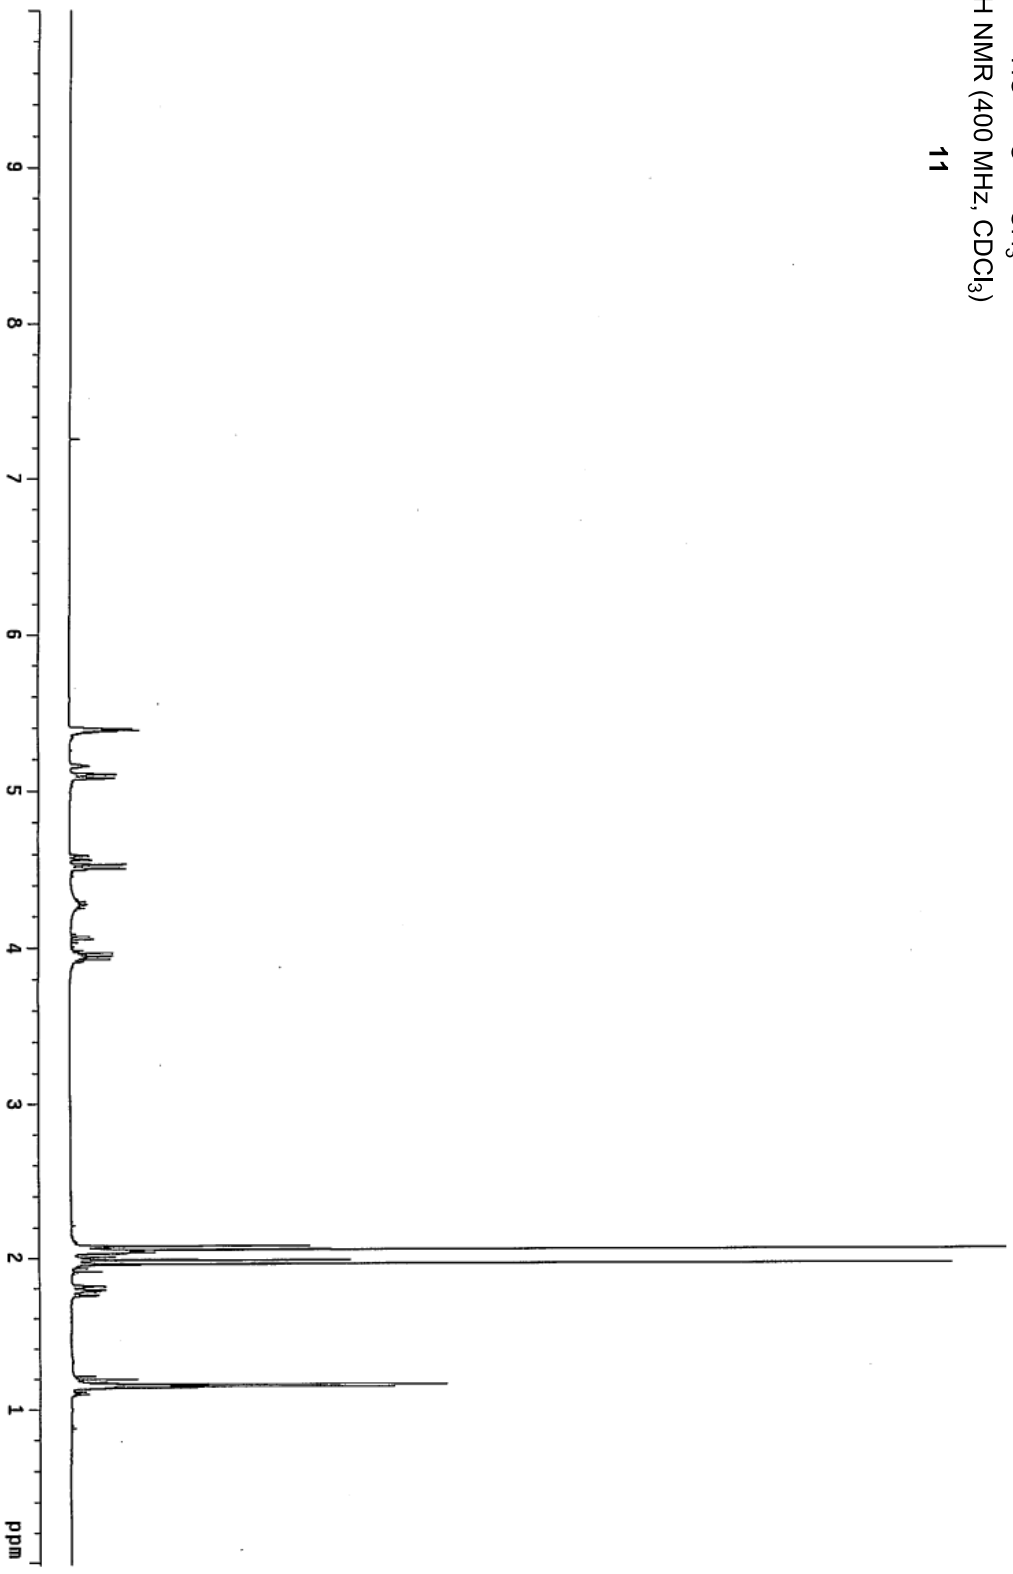

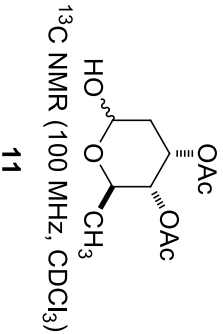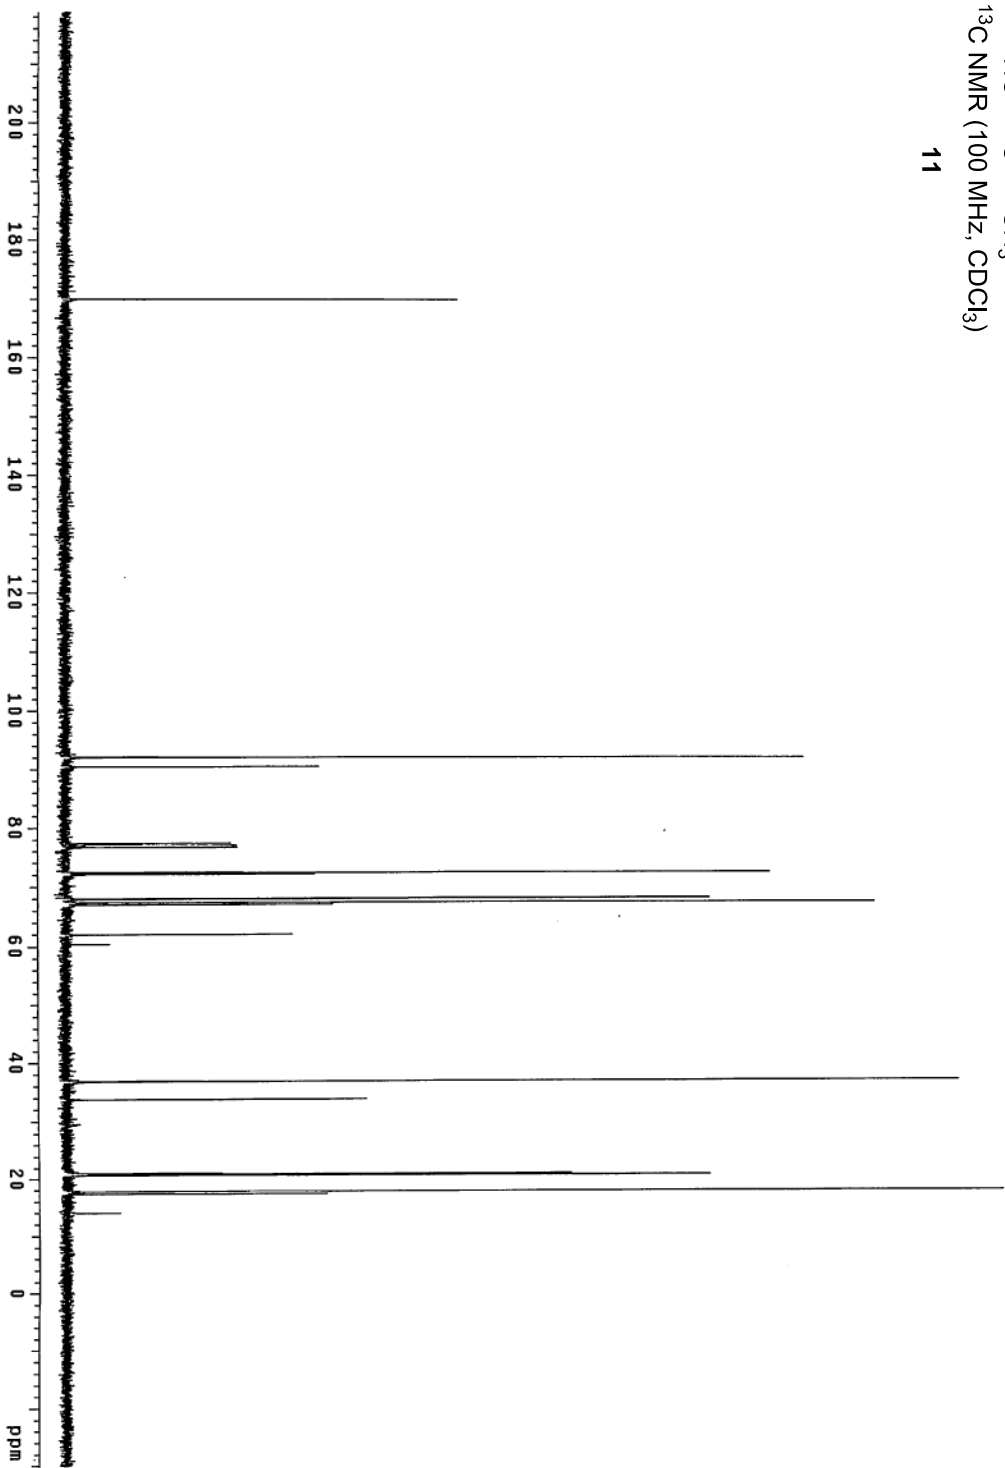

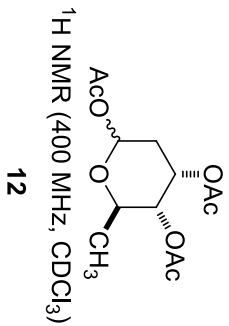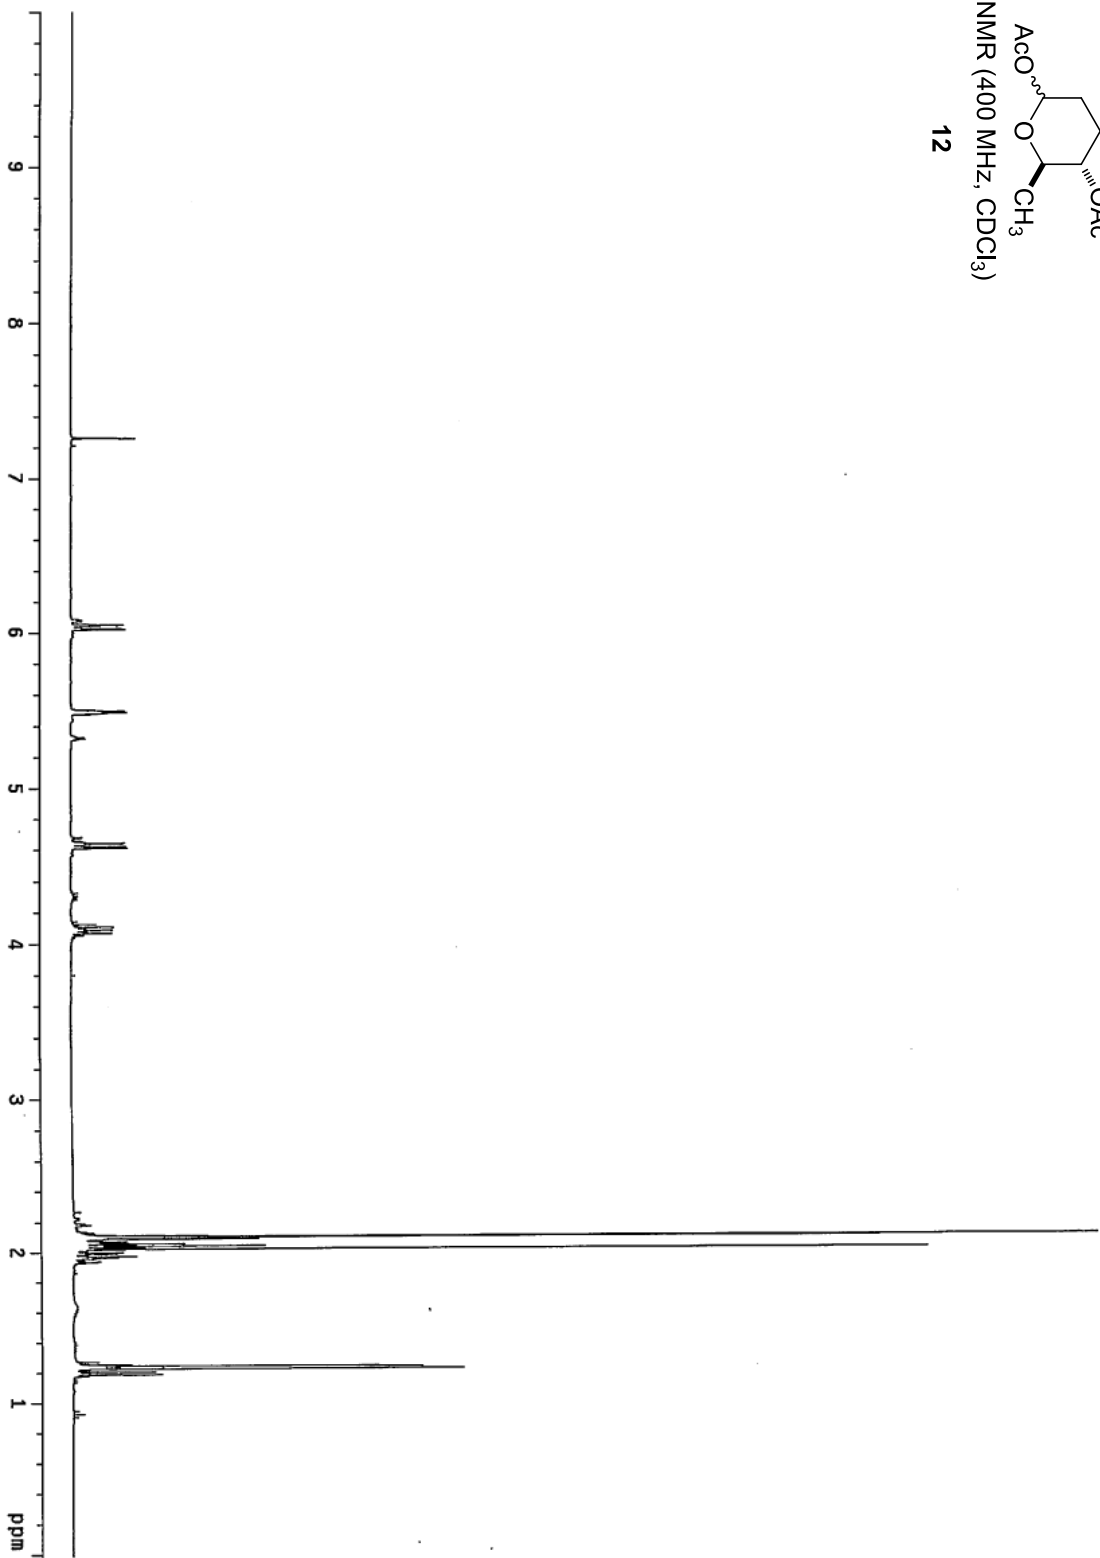

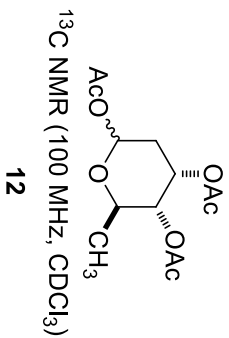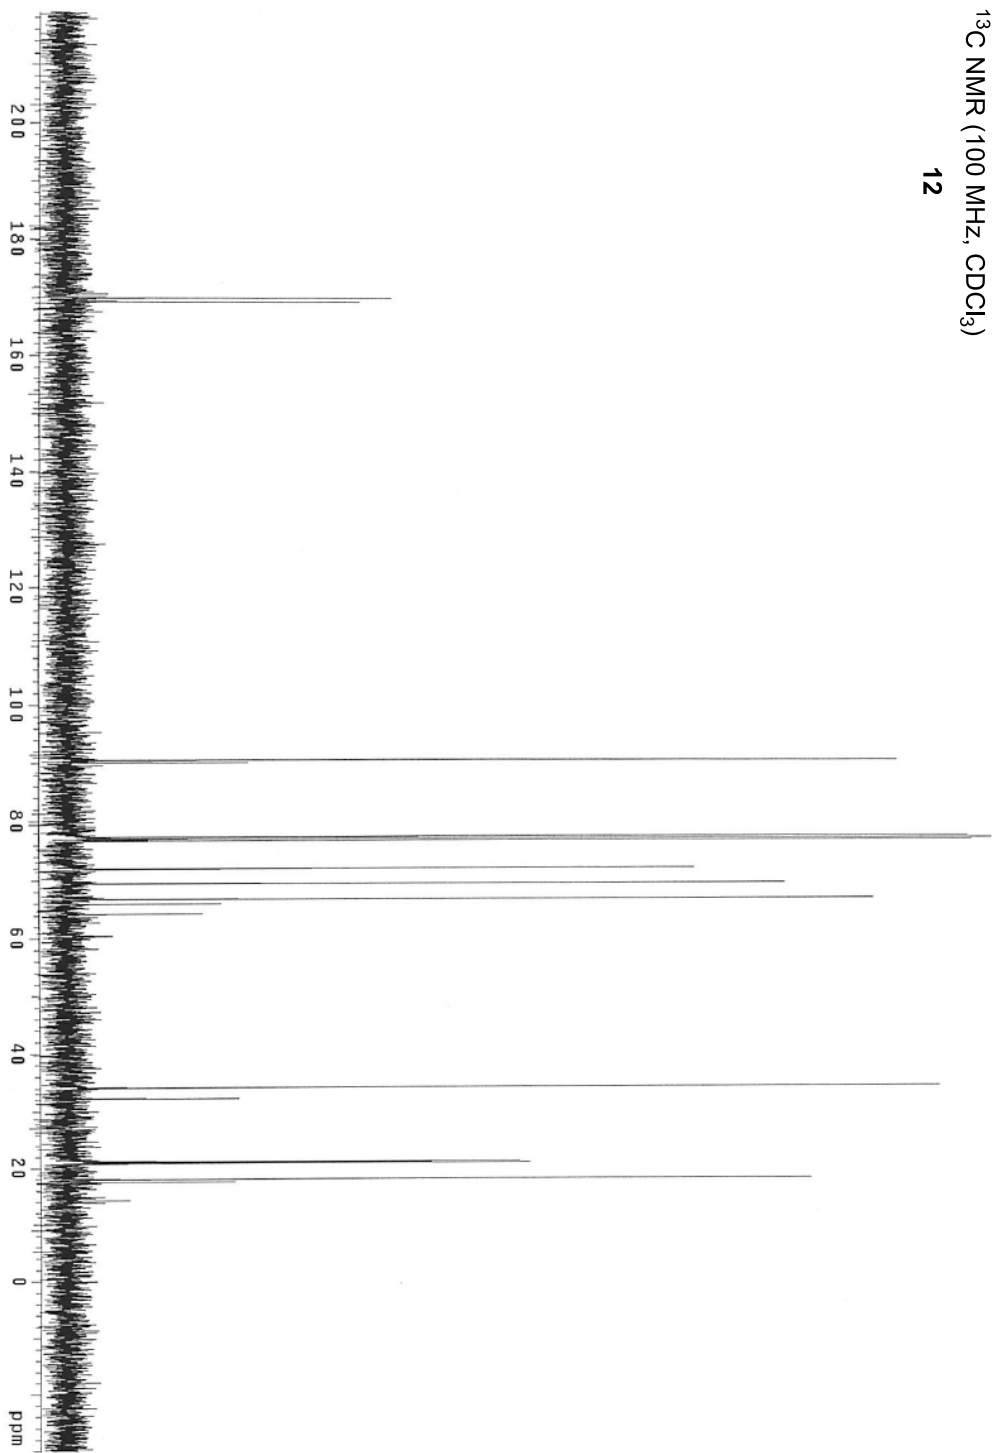



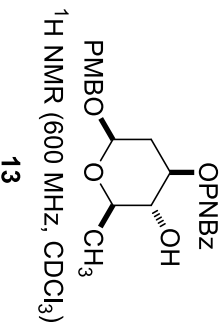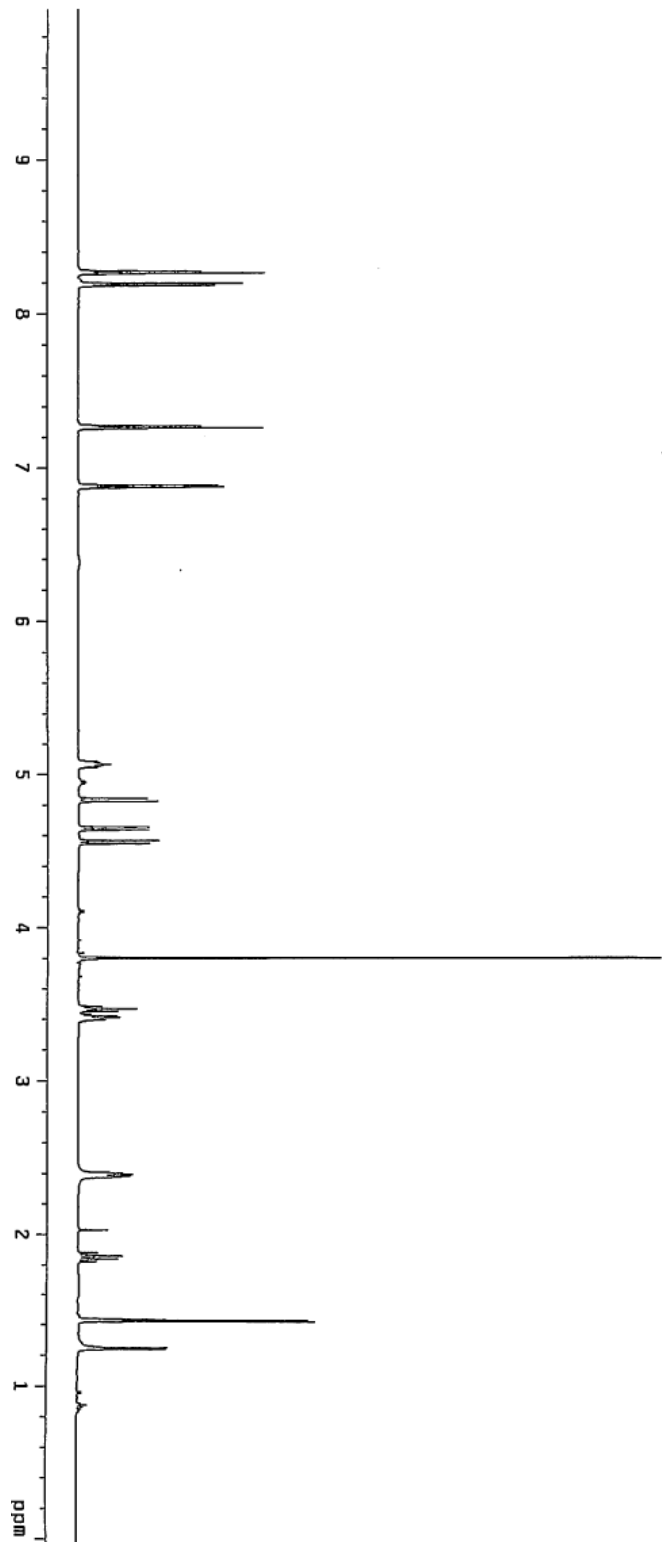

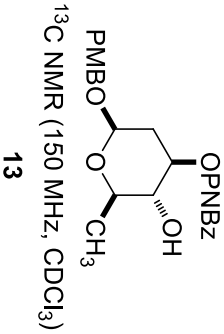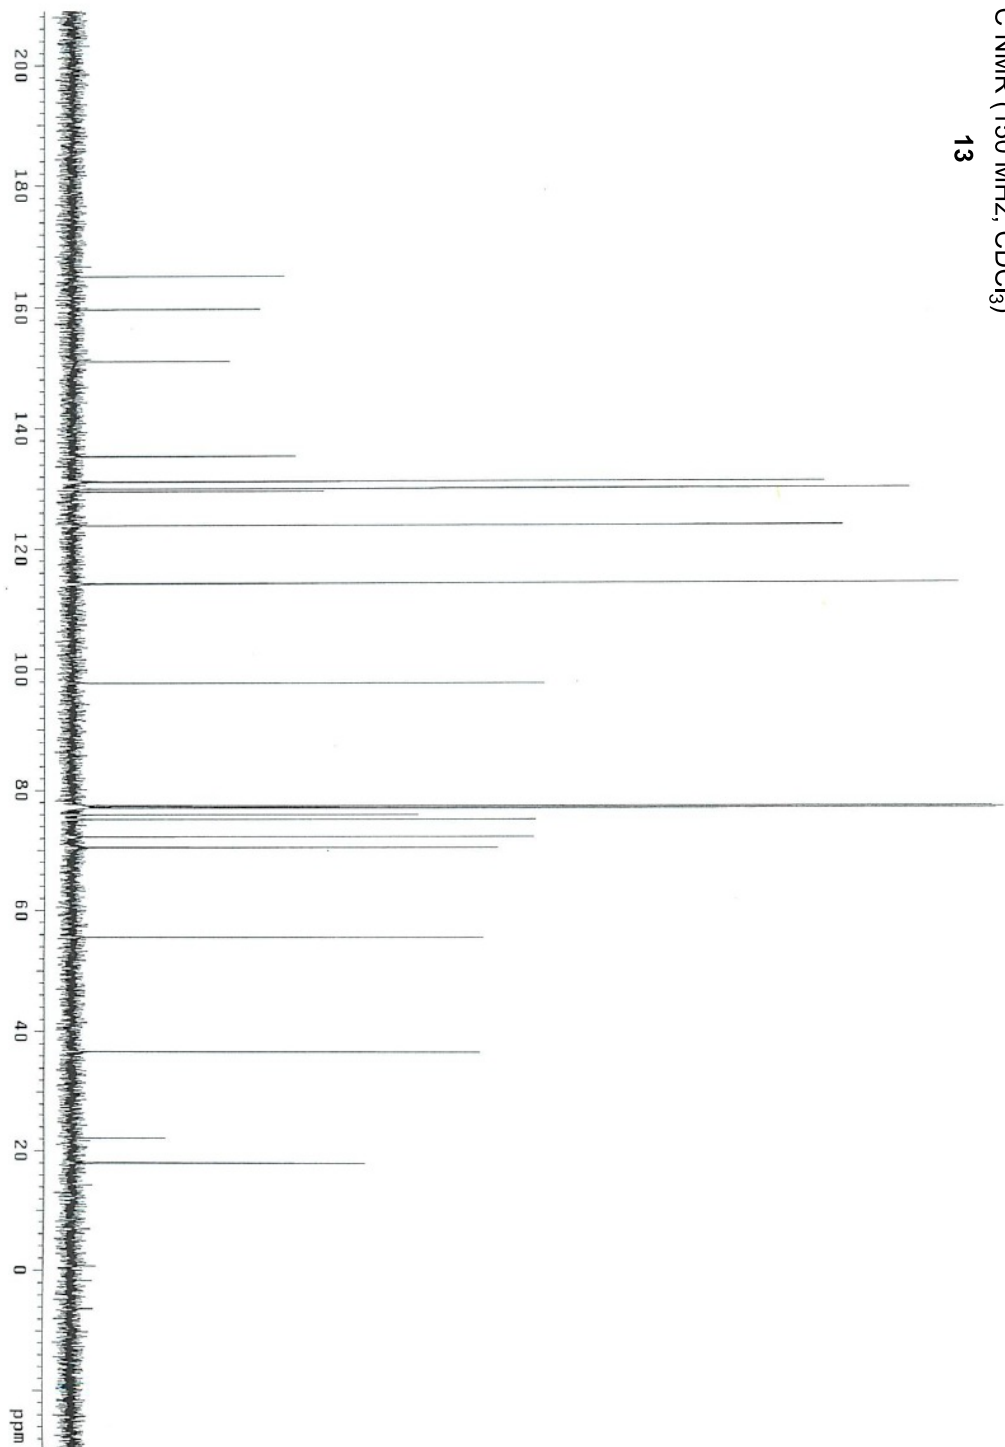

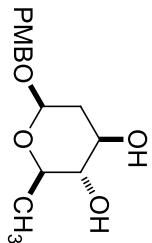

<sup>1</sup>H NMR (600 MHz, CDCl<sub>3</sub>)

14

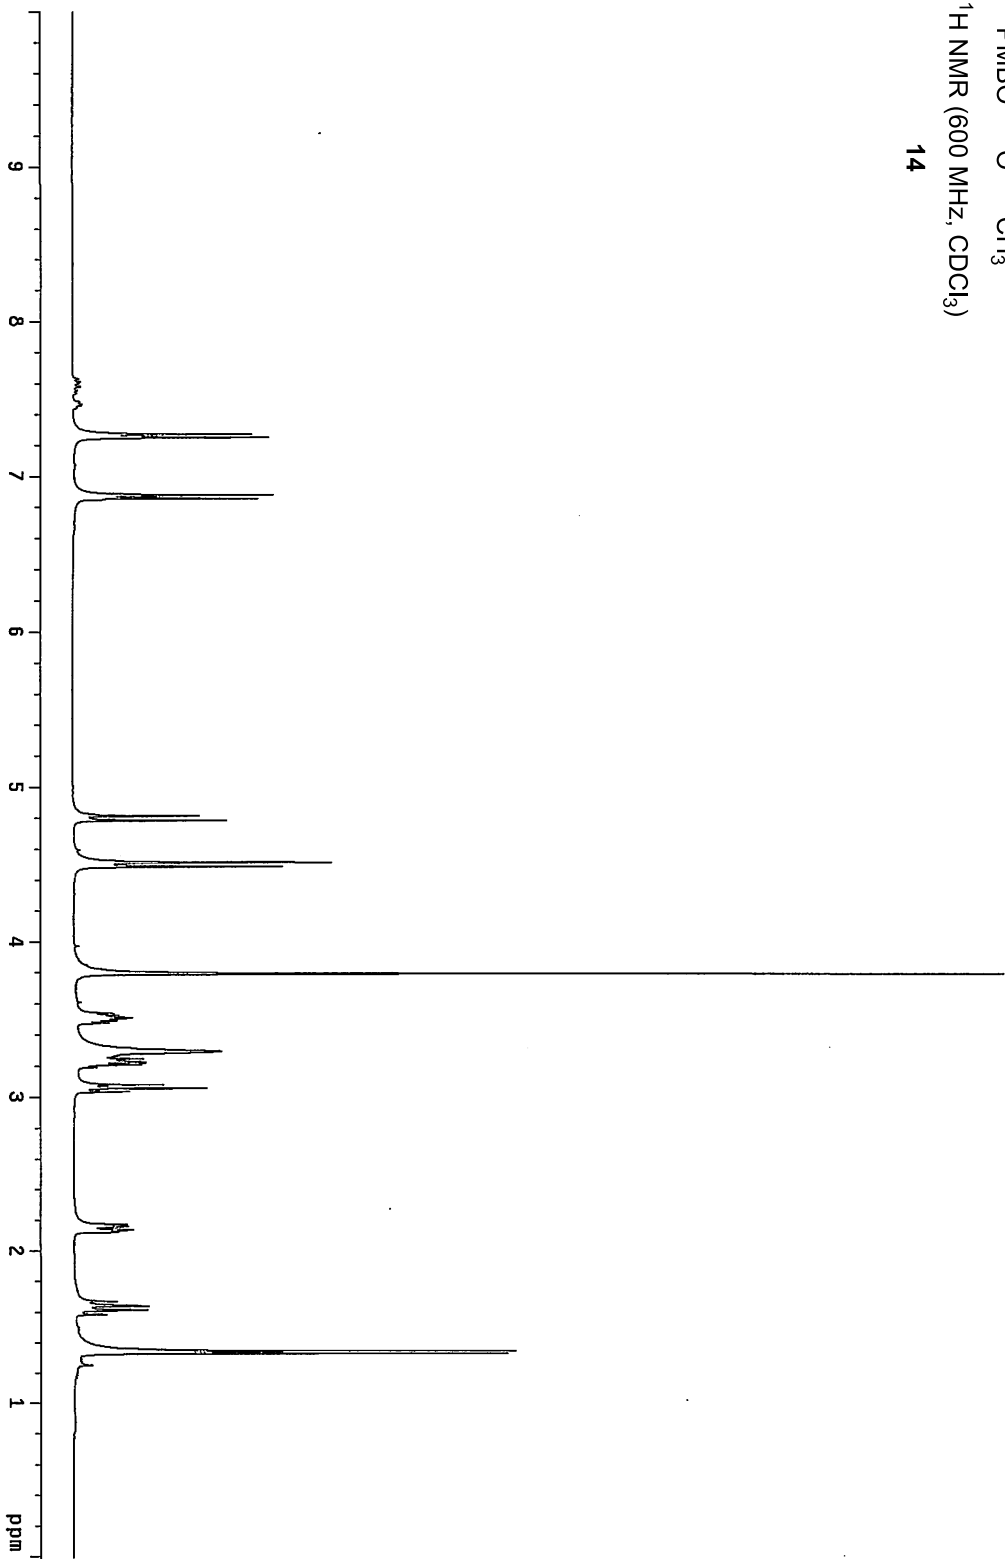

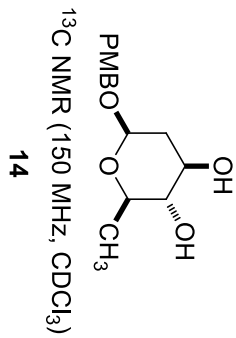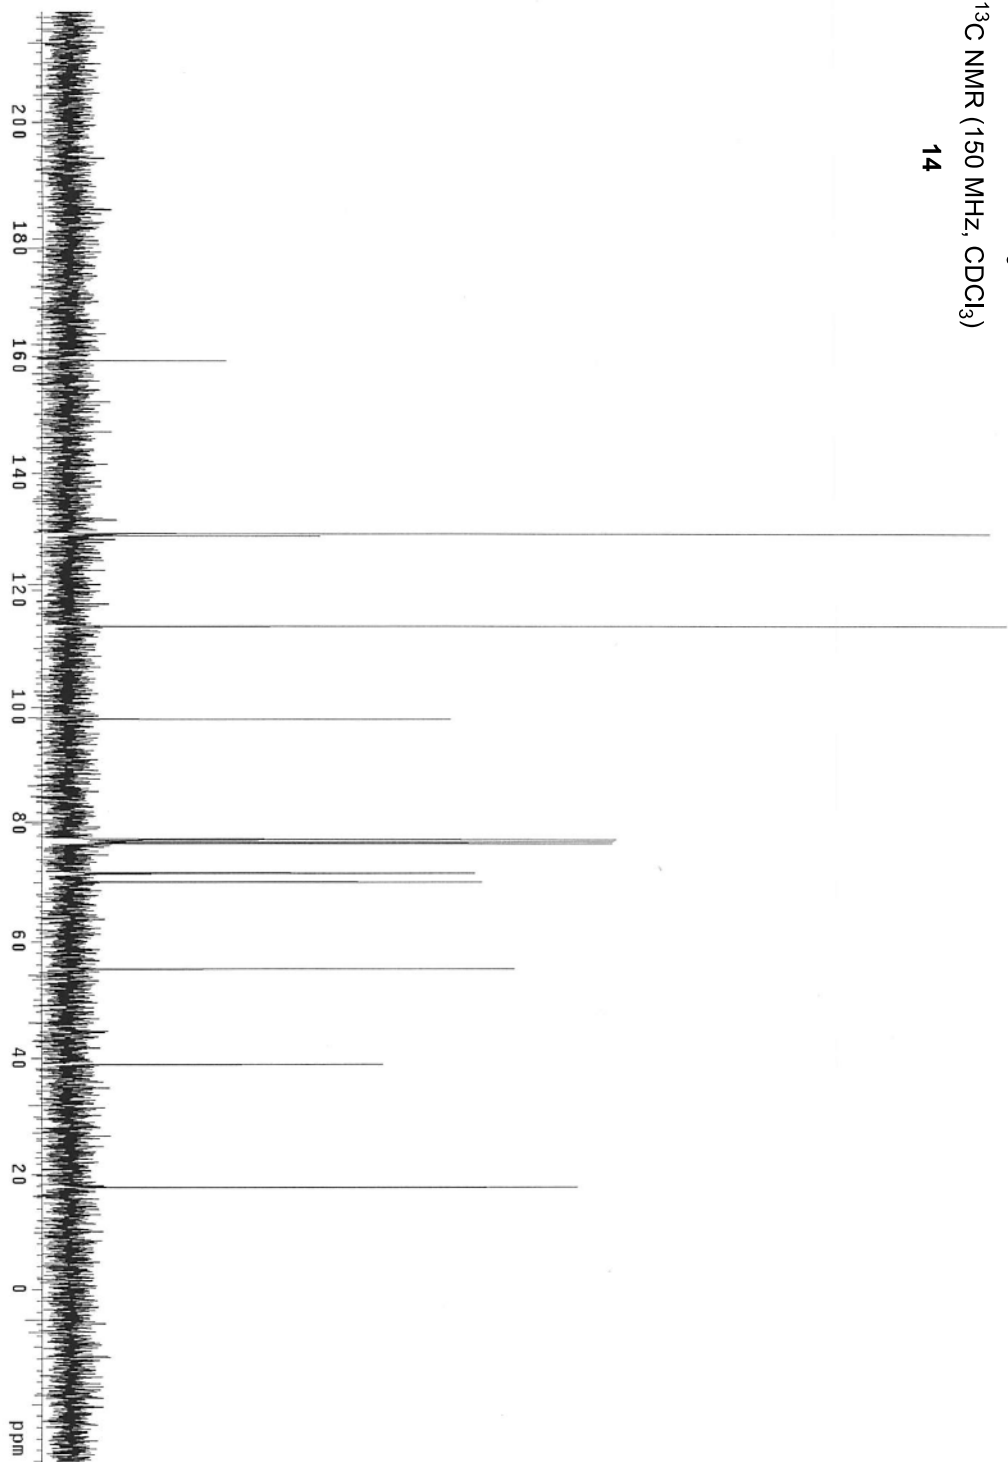

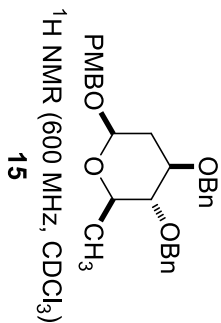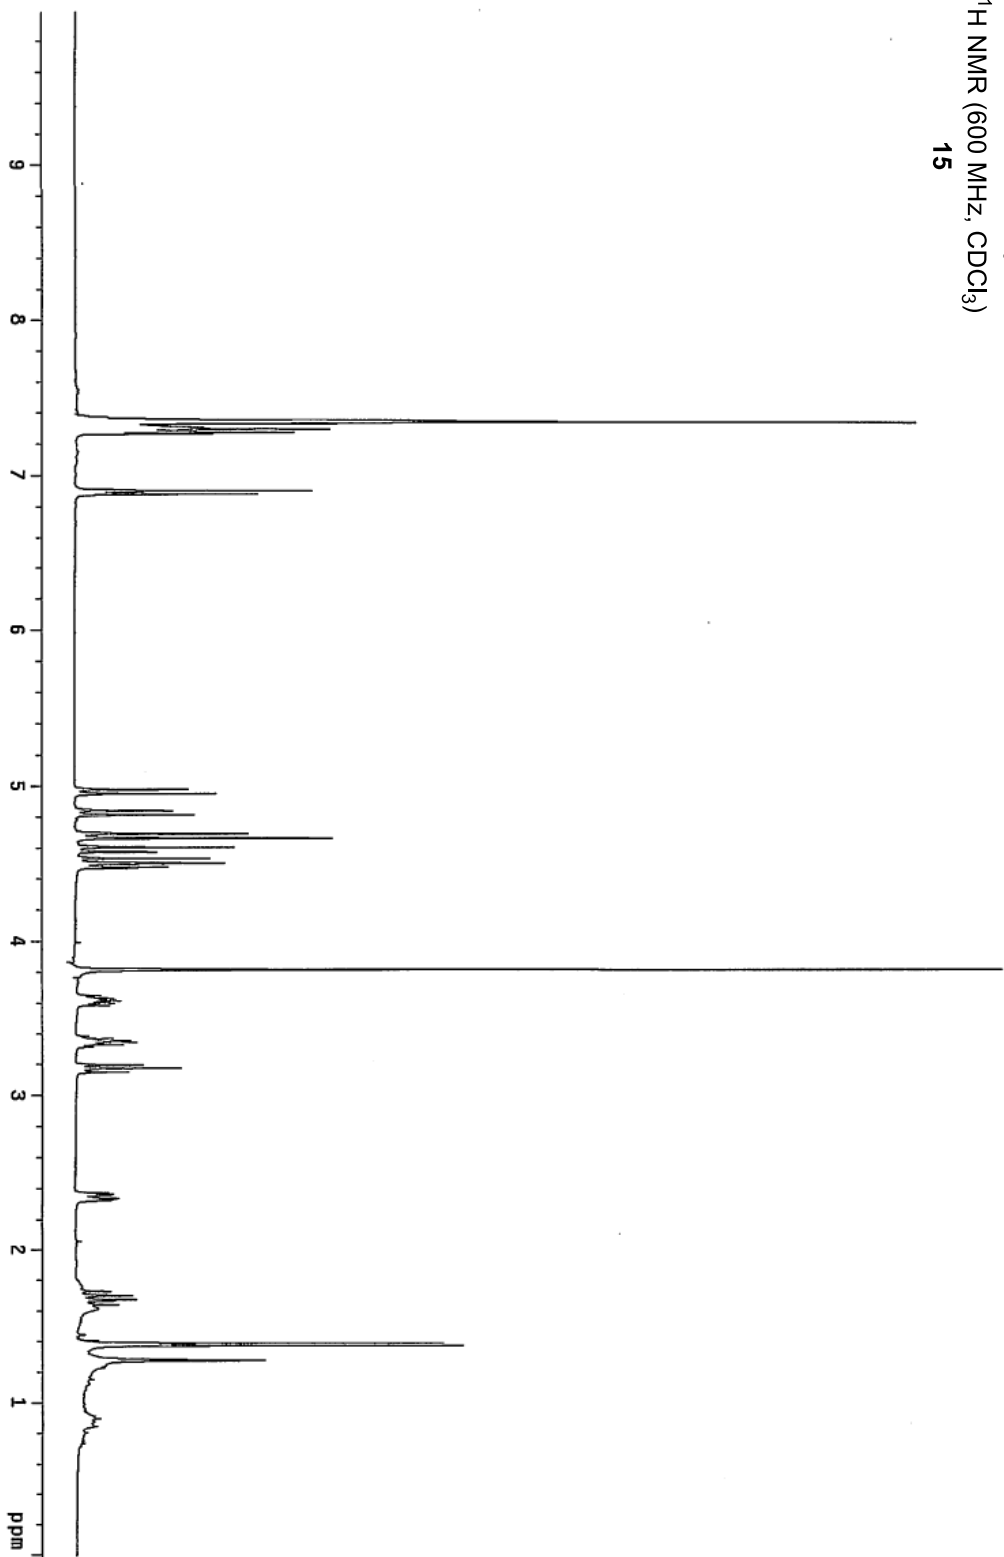

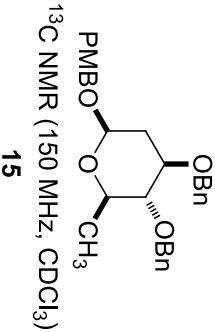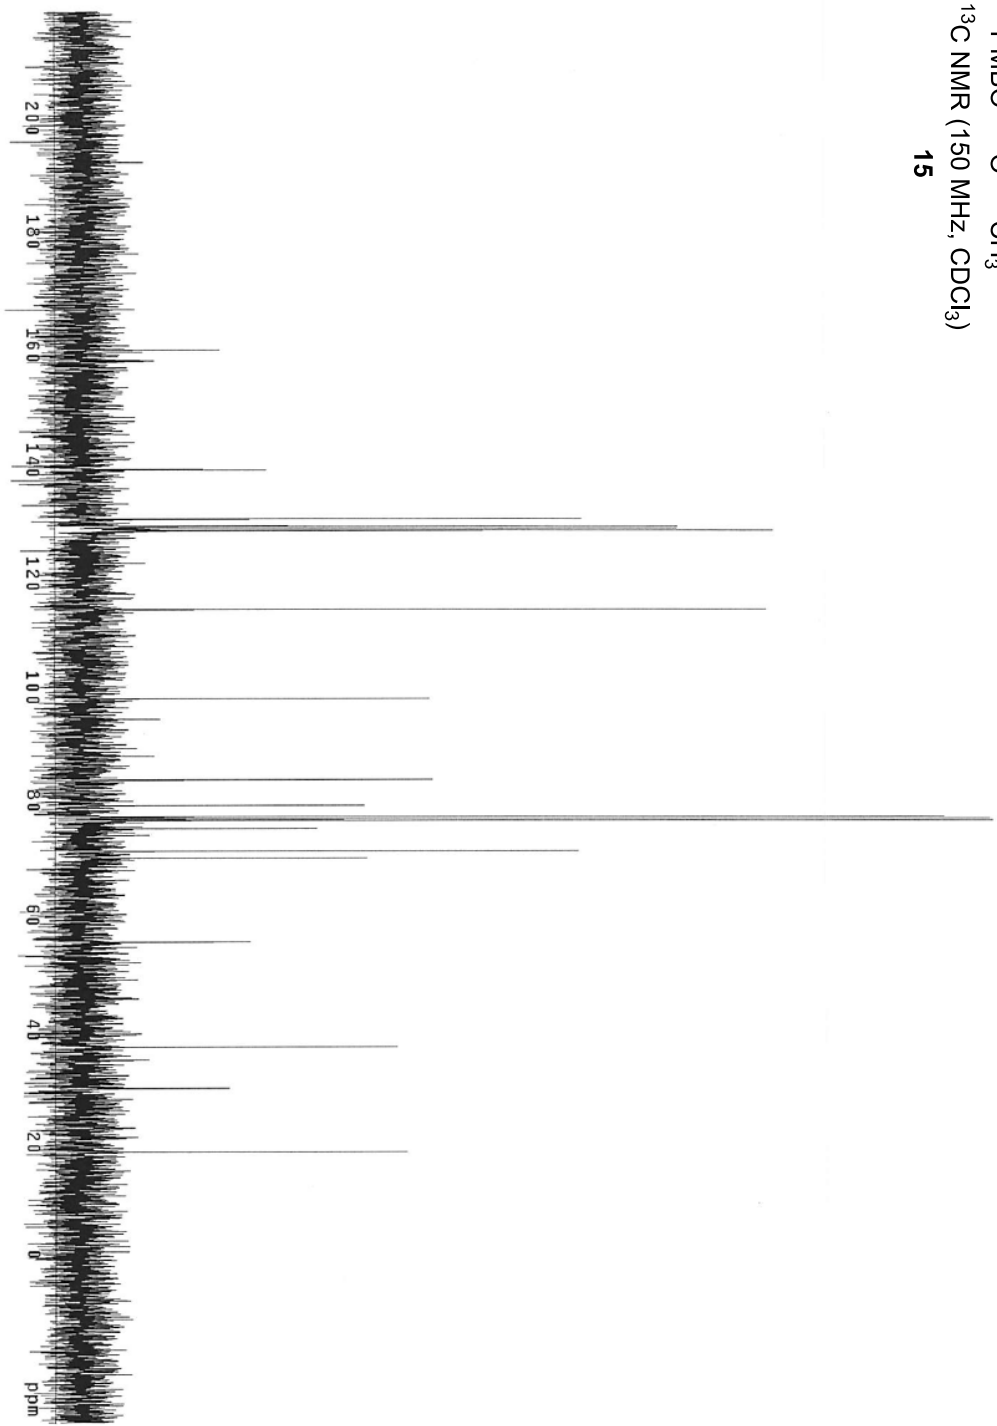

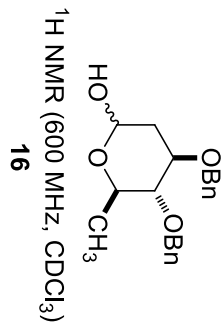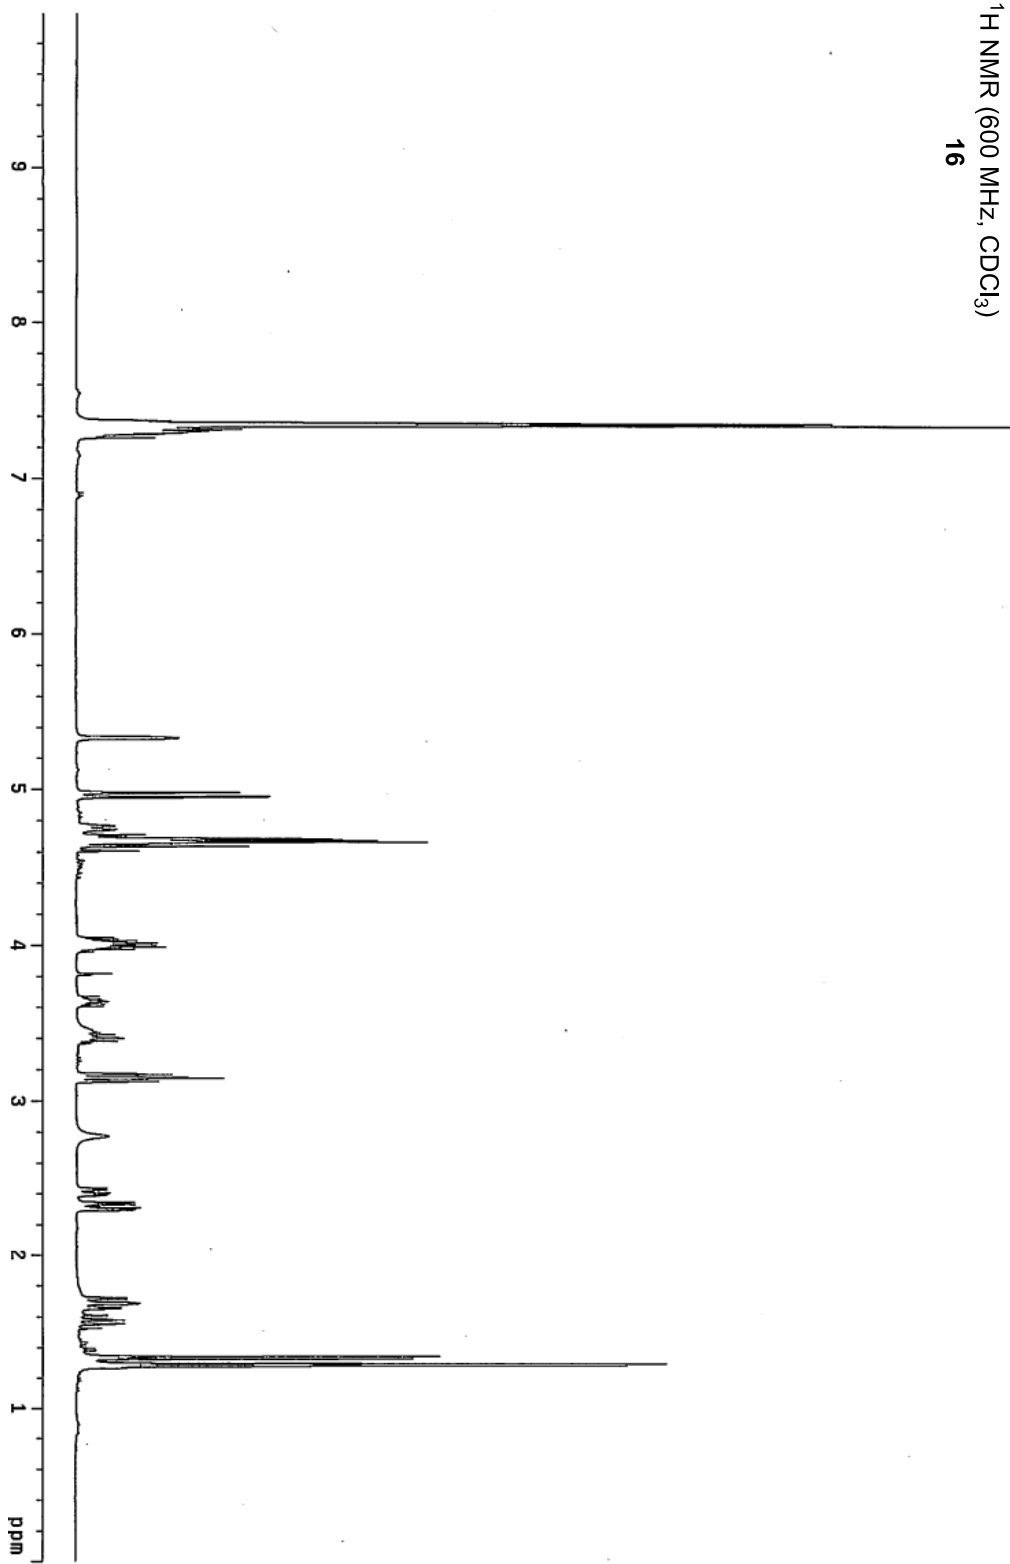

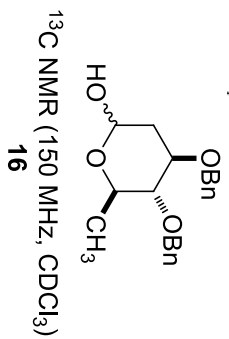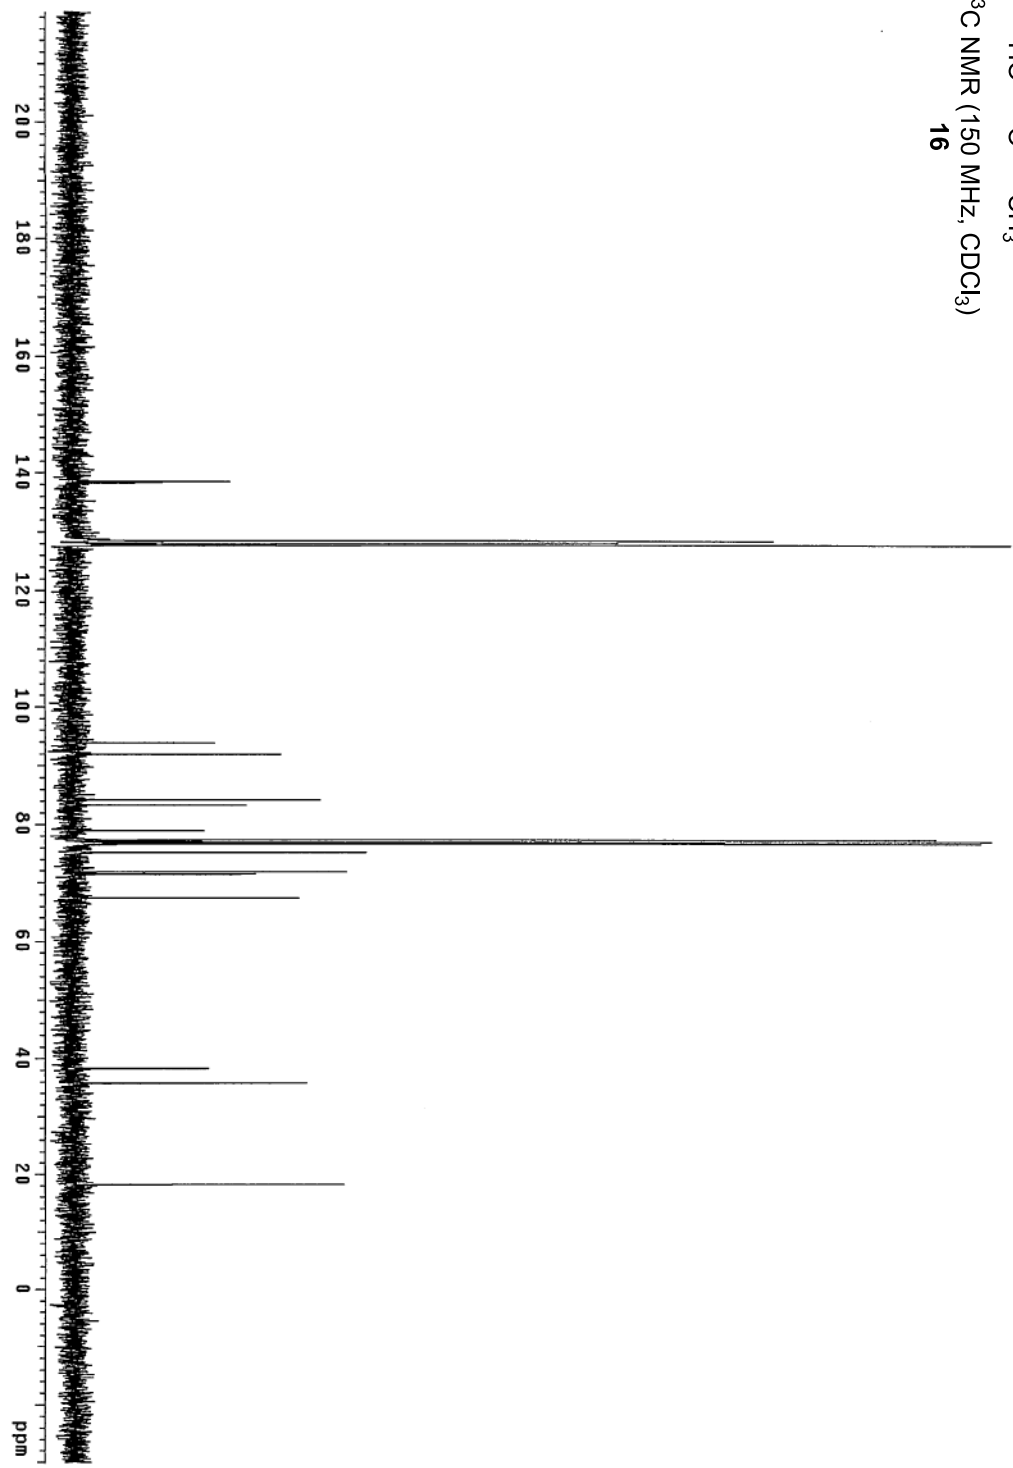



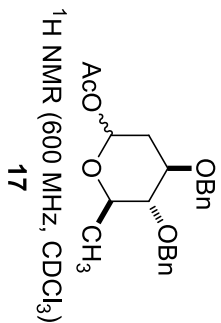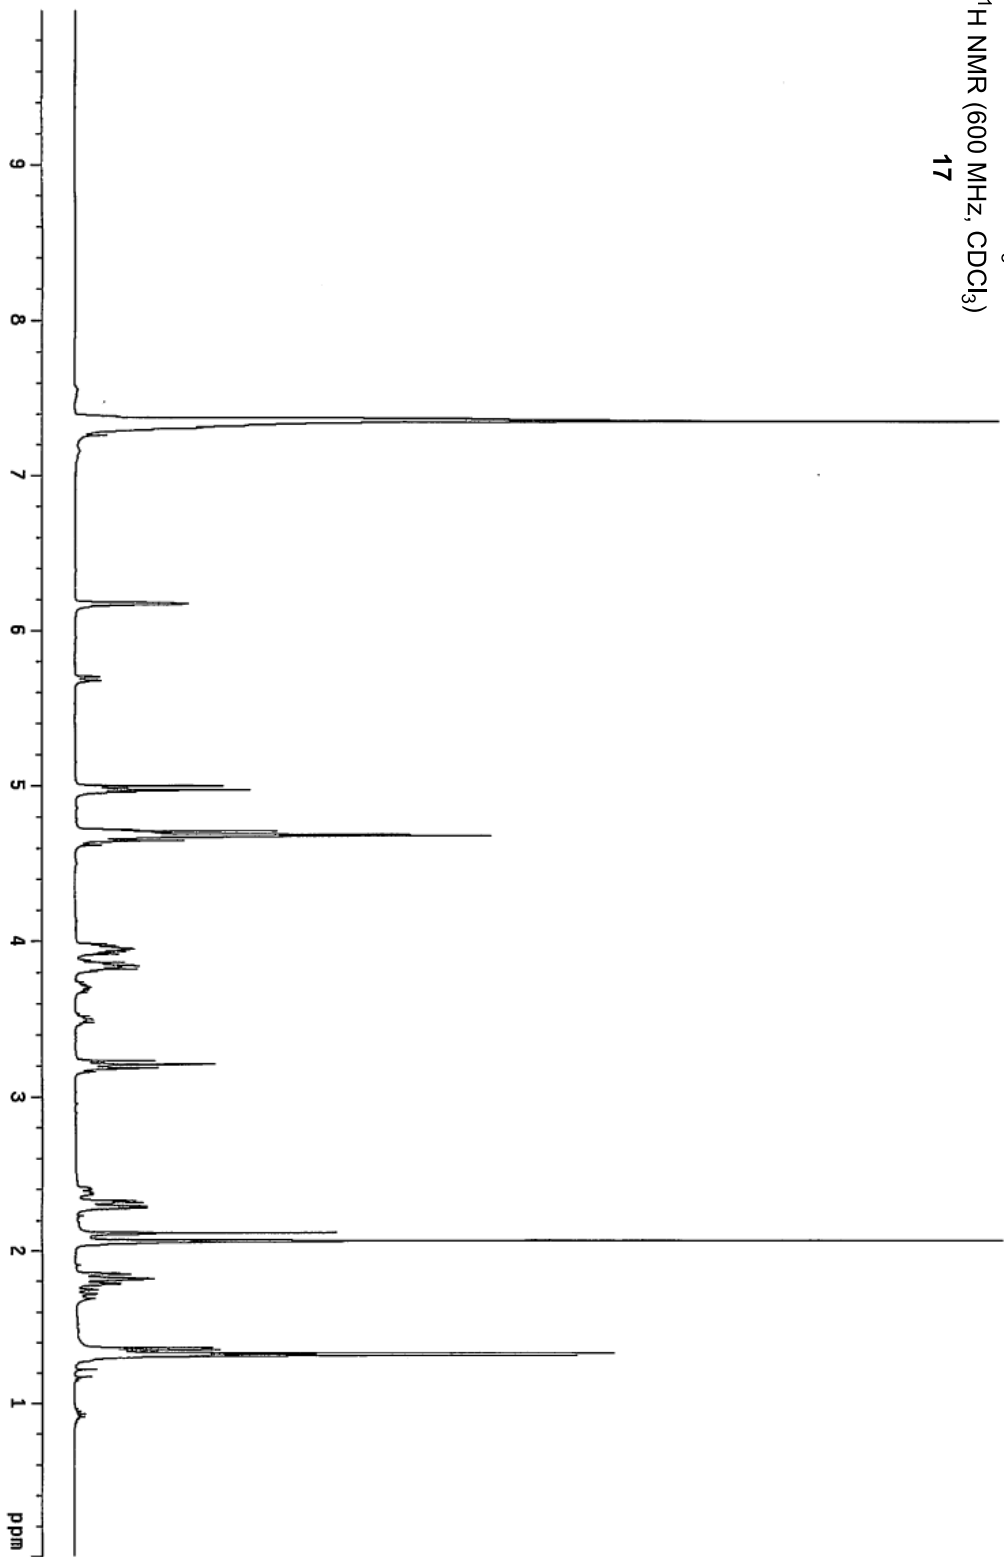

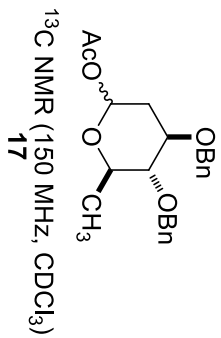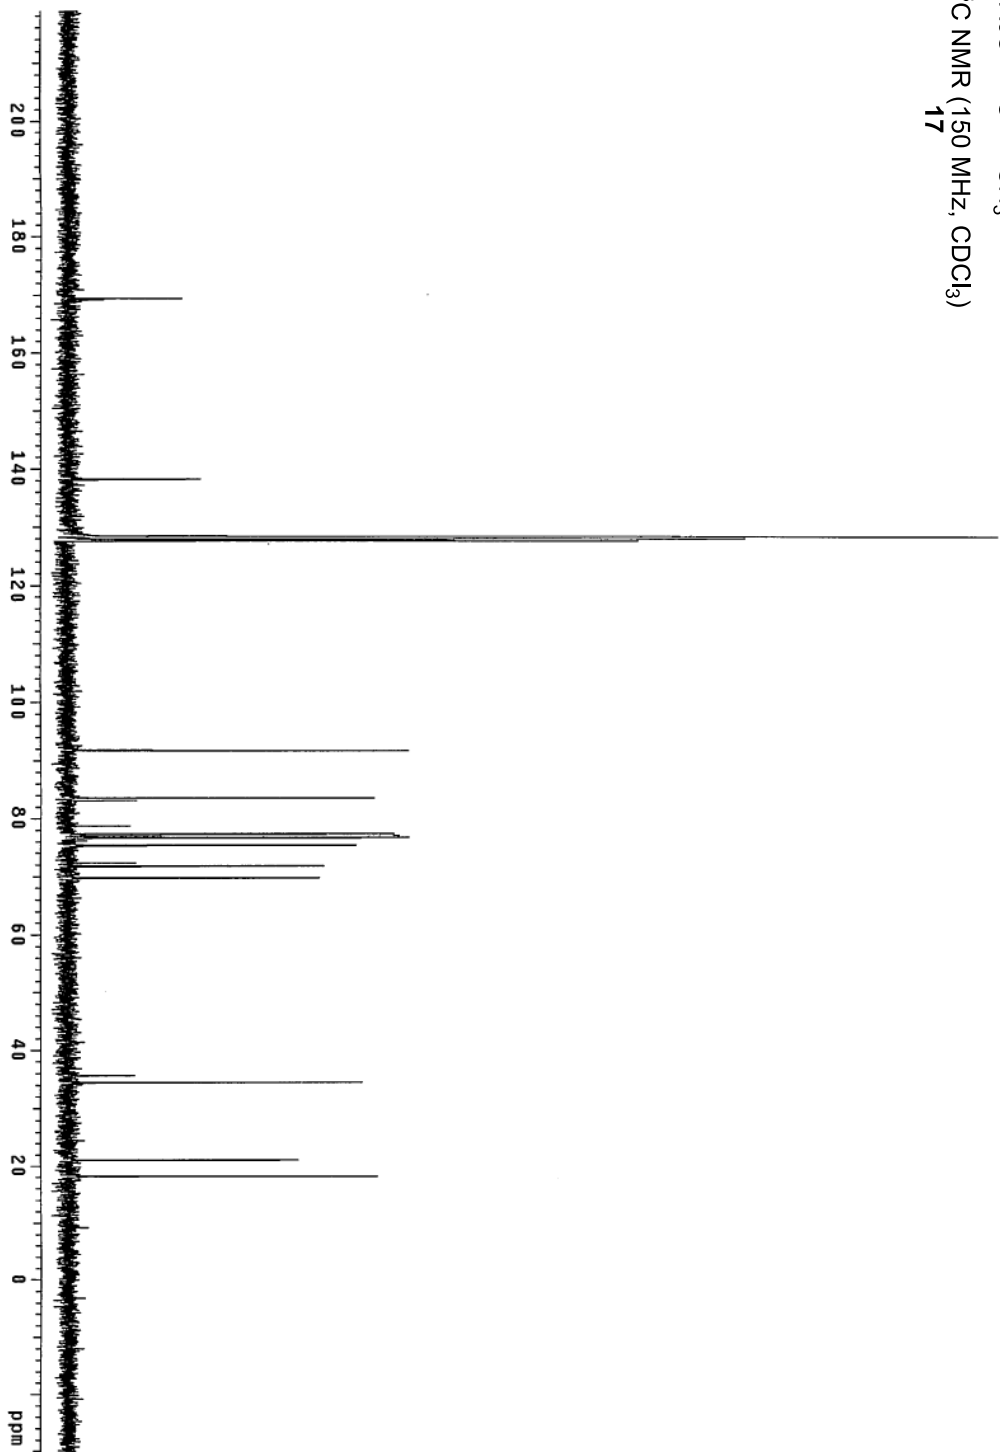

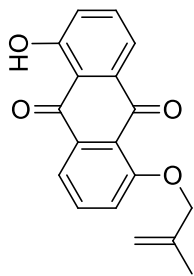

<sup>1</sup>H NMR (600 MHz, CDCl<sub>3</sub>)  
**5a**

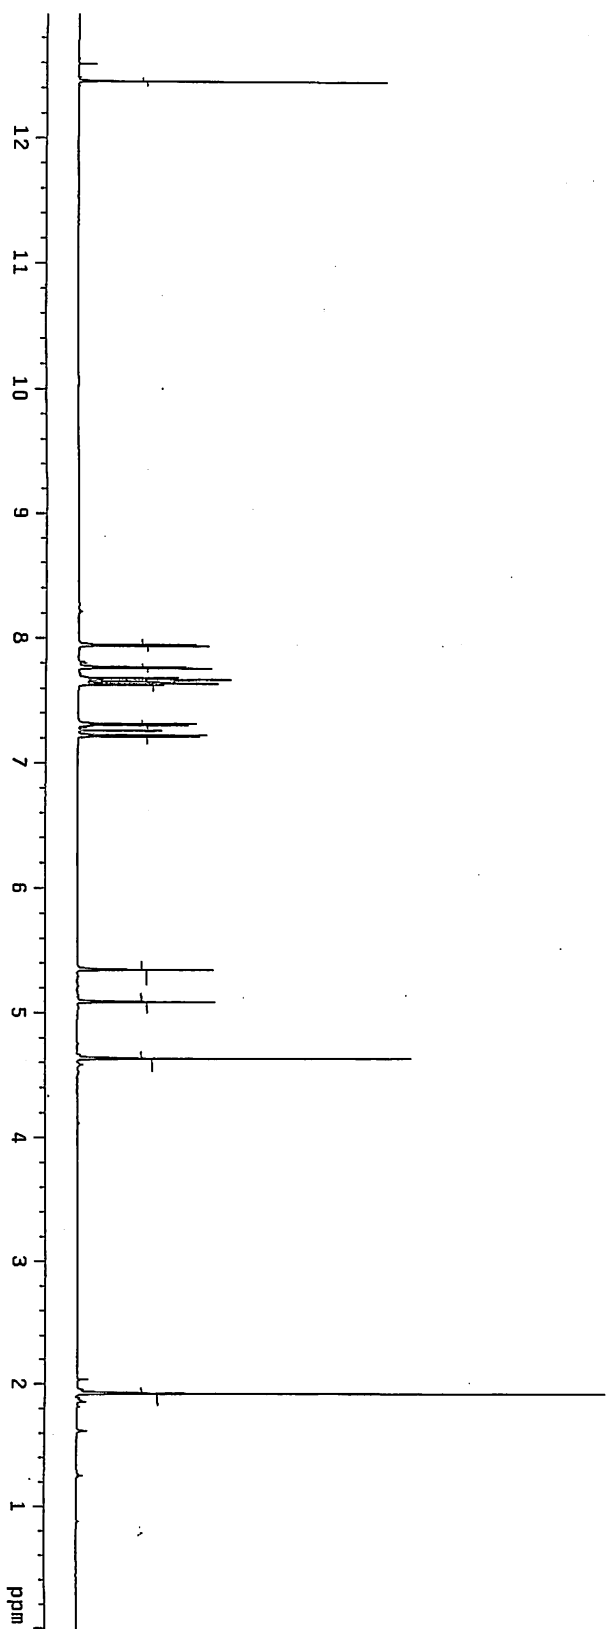

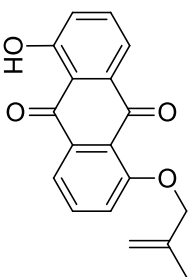

<sup>13</sup>C NMR (150 MHz, CDCl<sub>3</sub>)  
**5a**

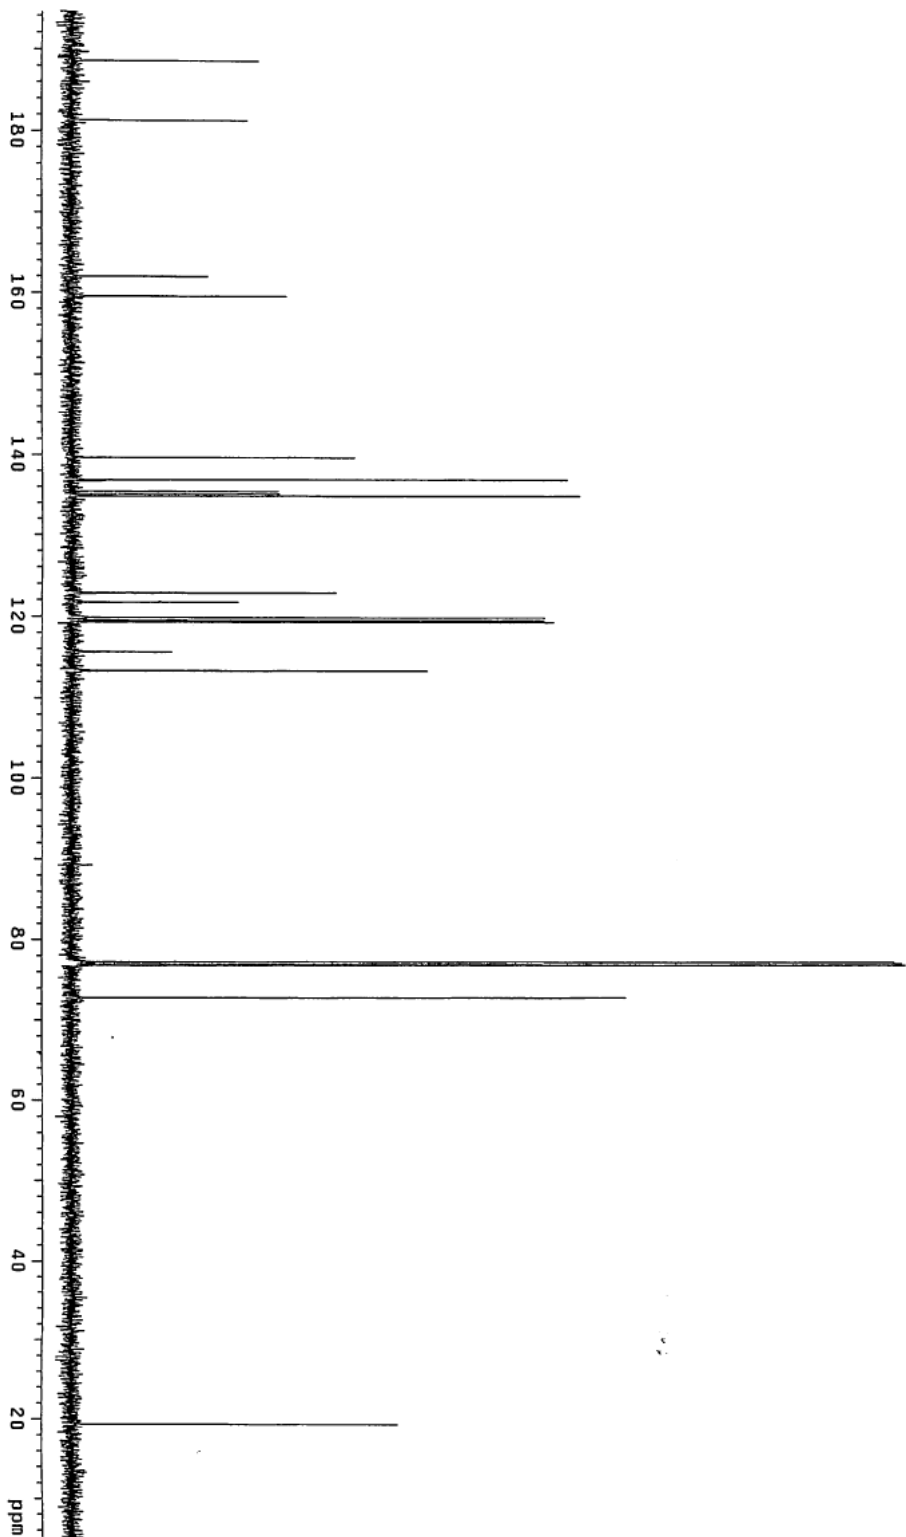

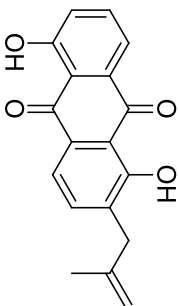

<sup>1</sup>H NMR (600 MHz, CDCl<sub>3</sub>)  
**5b**

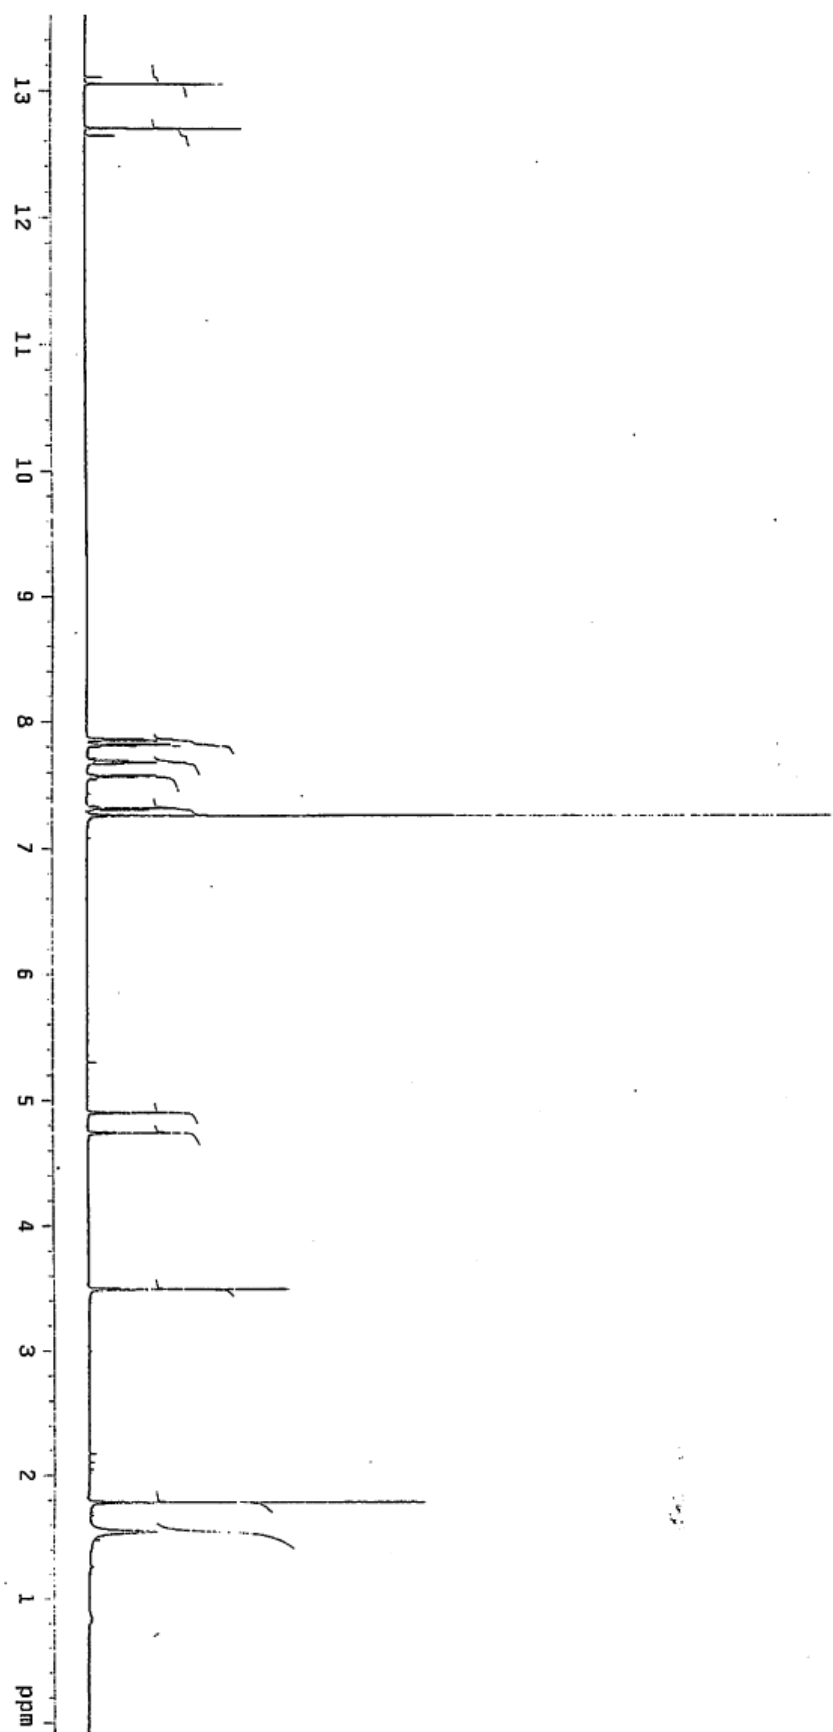

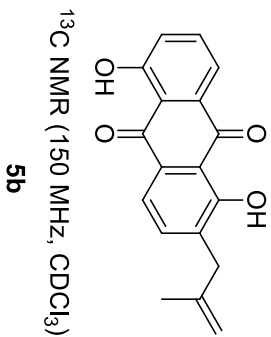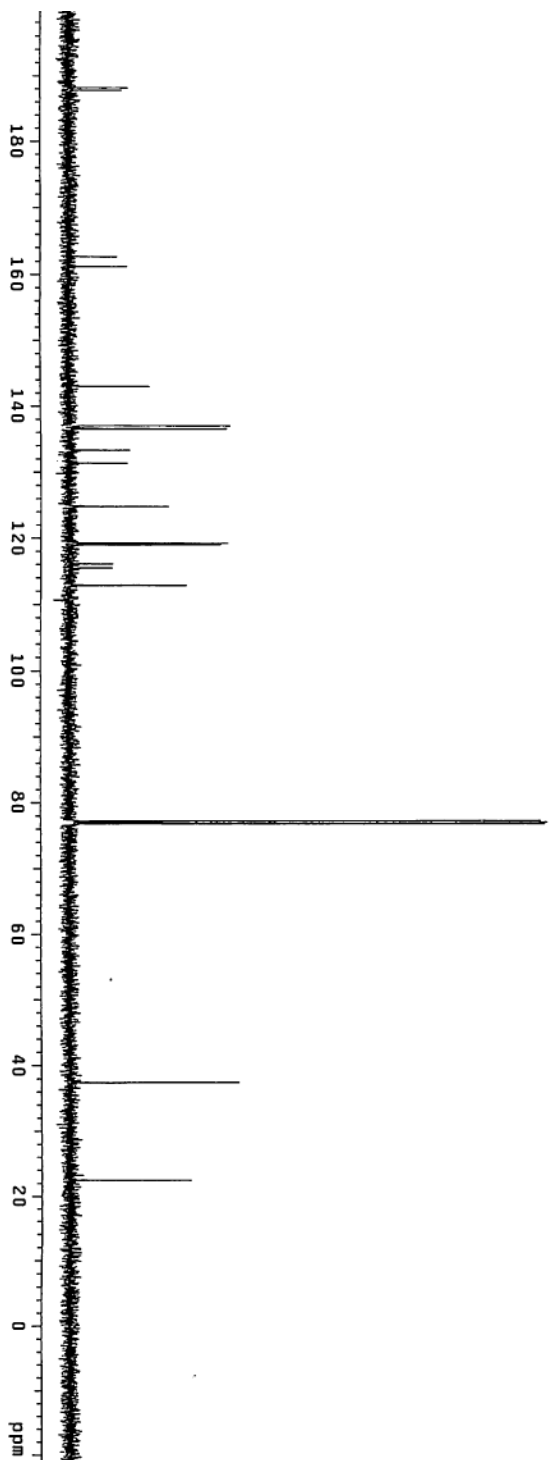

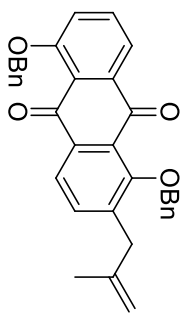

<sup>1</sup>H NMR (600 MHz, CDCl<sub>3</sub>)

**5c**

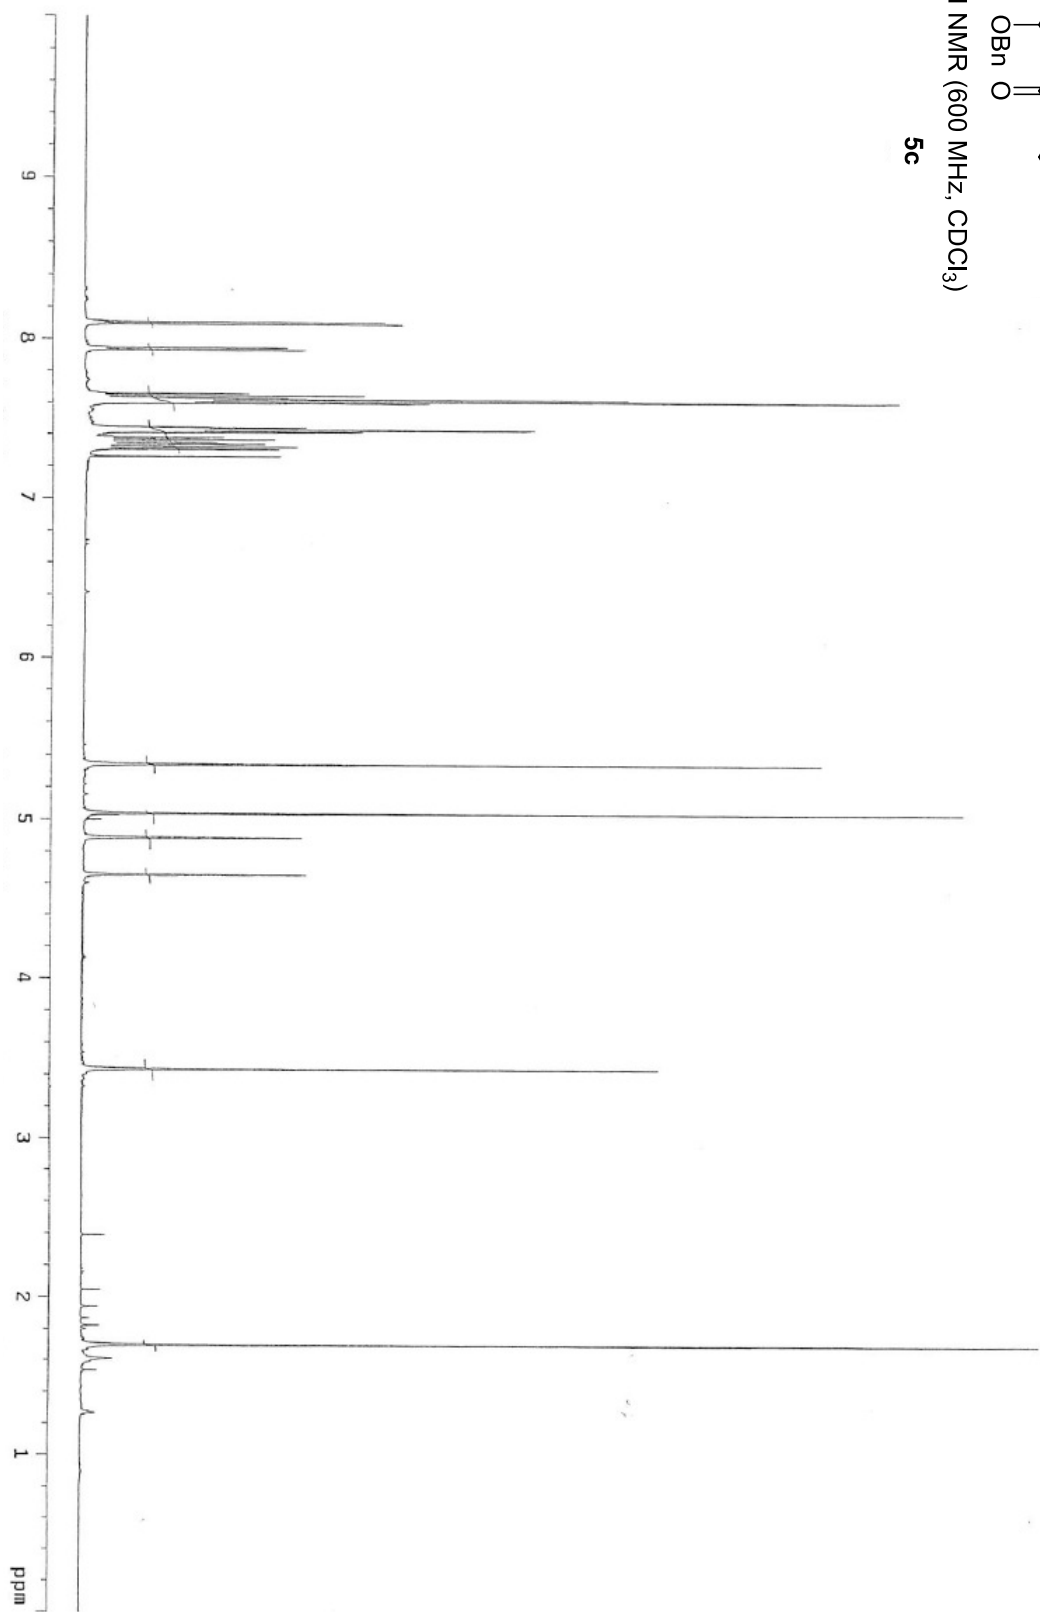

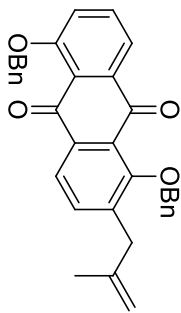

<sup>13</sup>C NMR (150 MHz, CDCl<sub>3</sub>)

**5c**

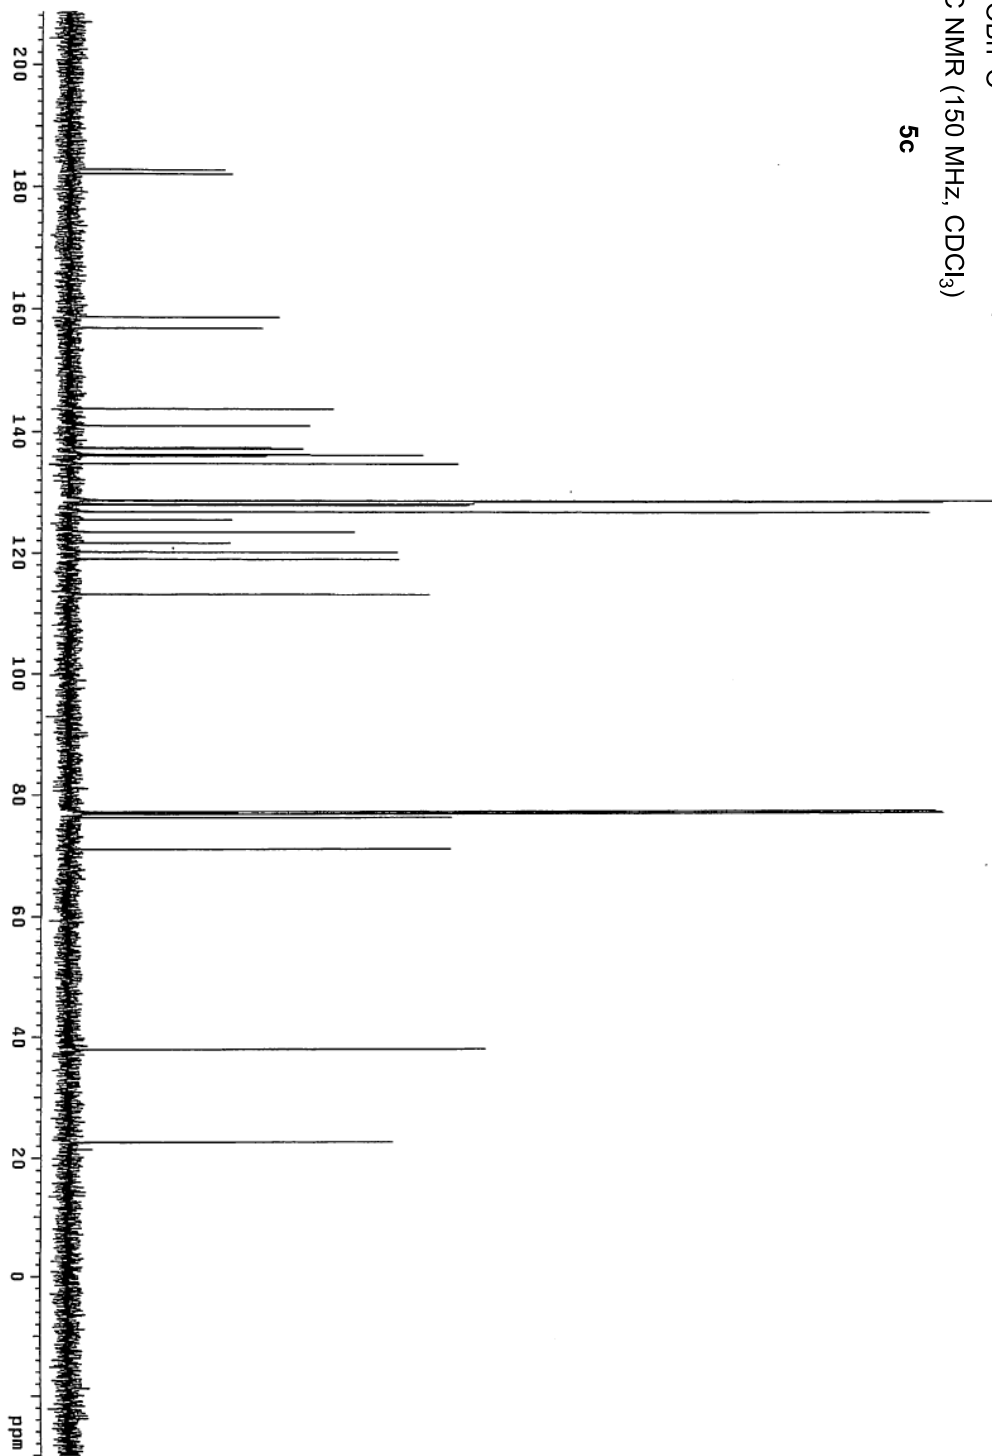



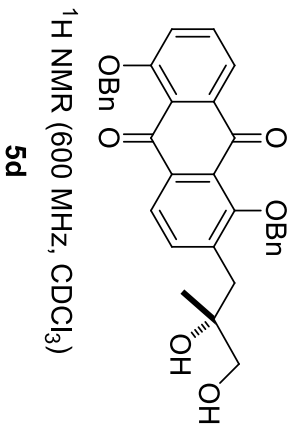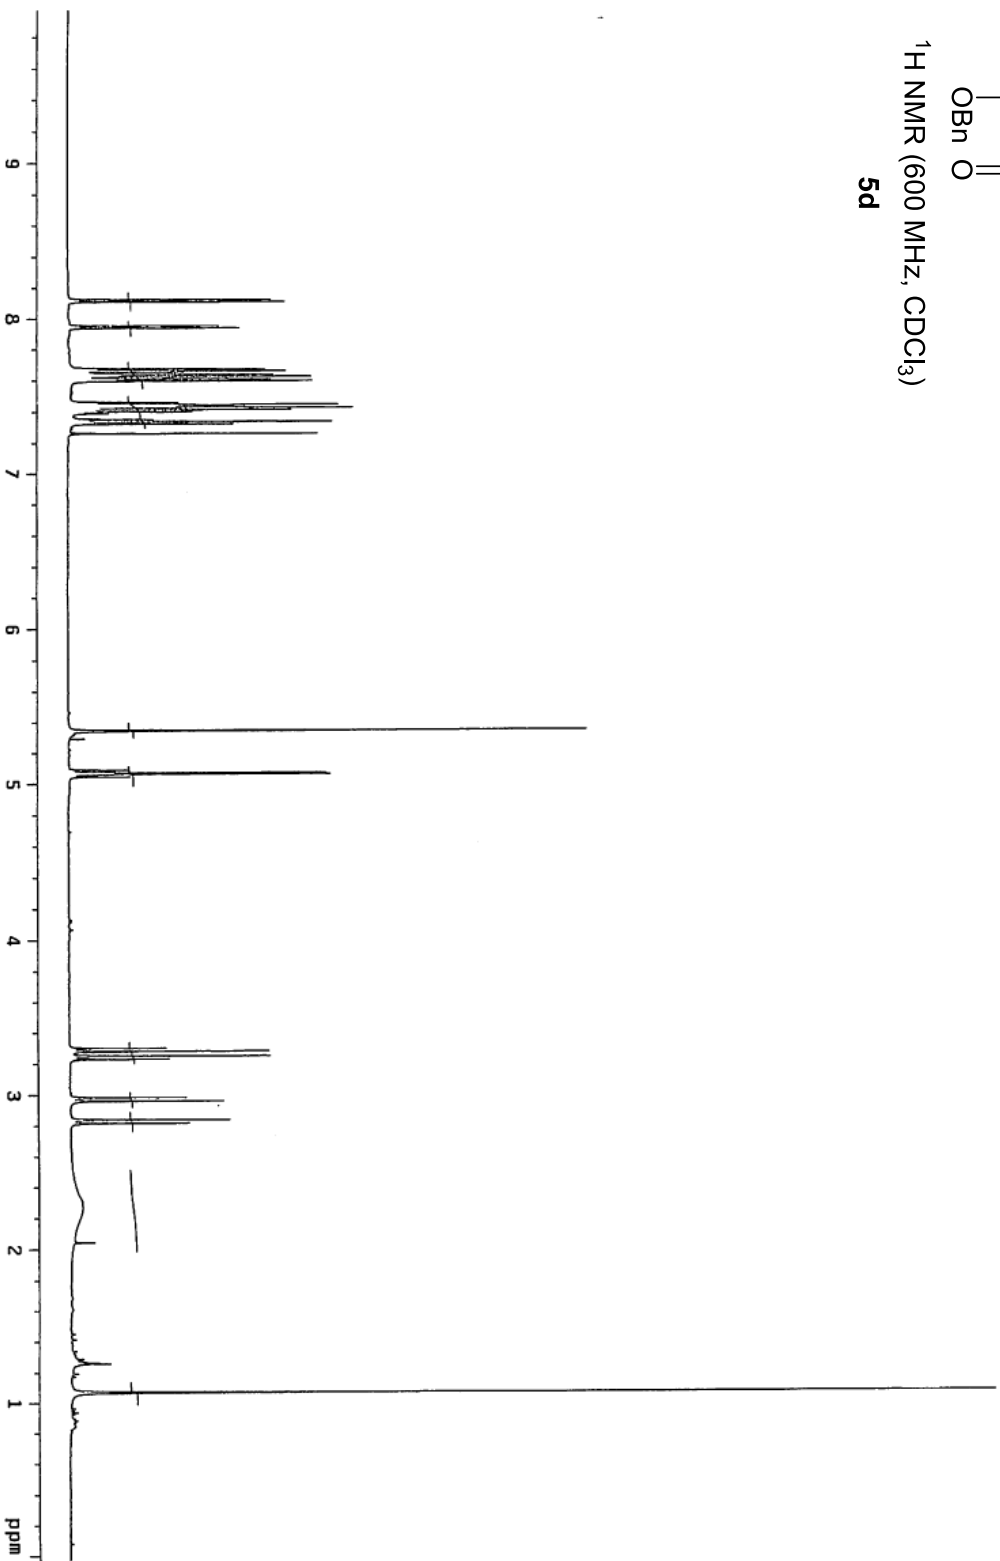

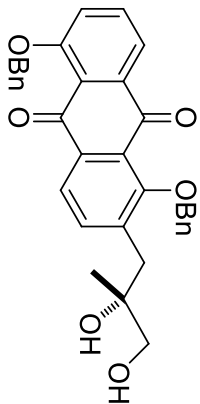

$^{14}\text{C}$  NMR (150 MHz,  $\text{CDCl}_3$ )

5c

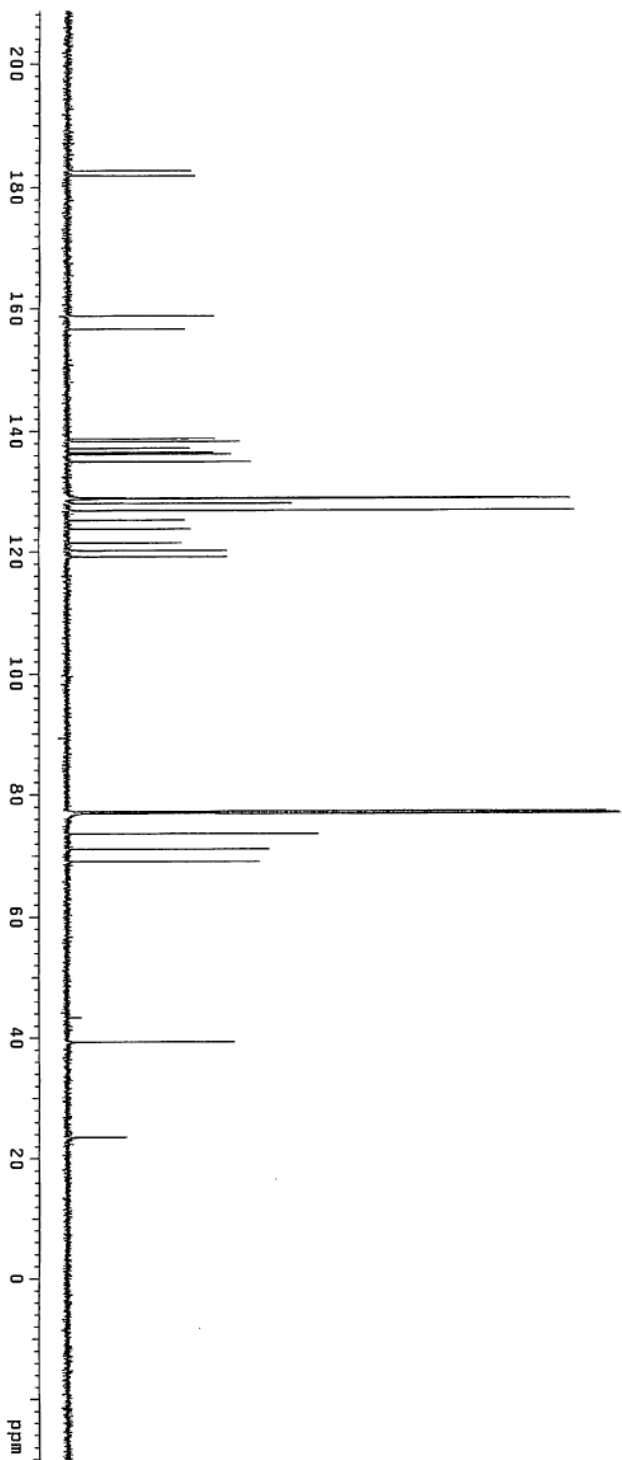

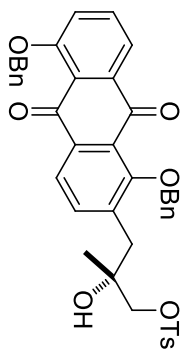

<sup>1</sup>H NMR (600 MHz, CDCl<sub>3</sub>)

**5d**

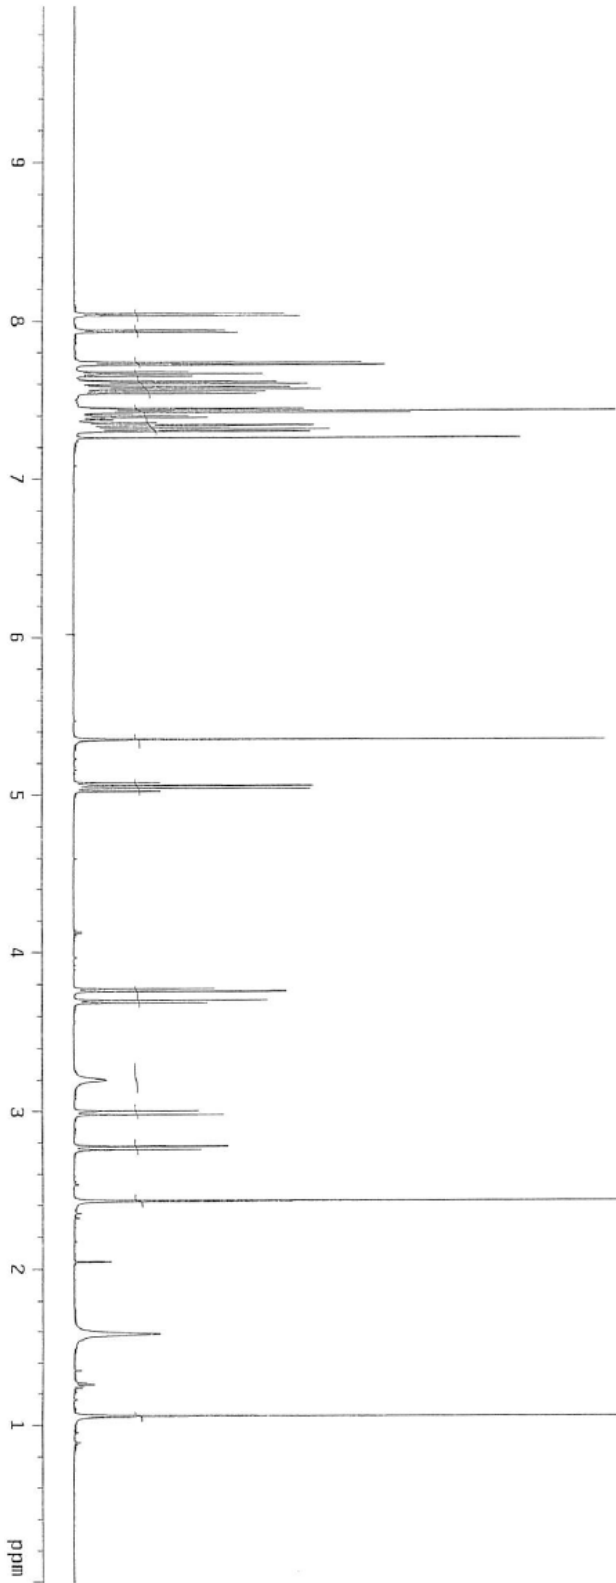

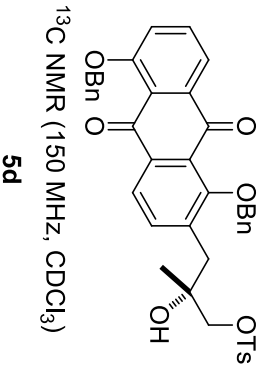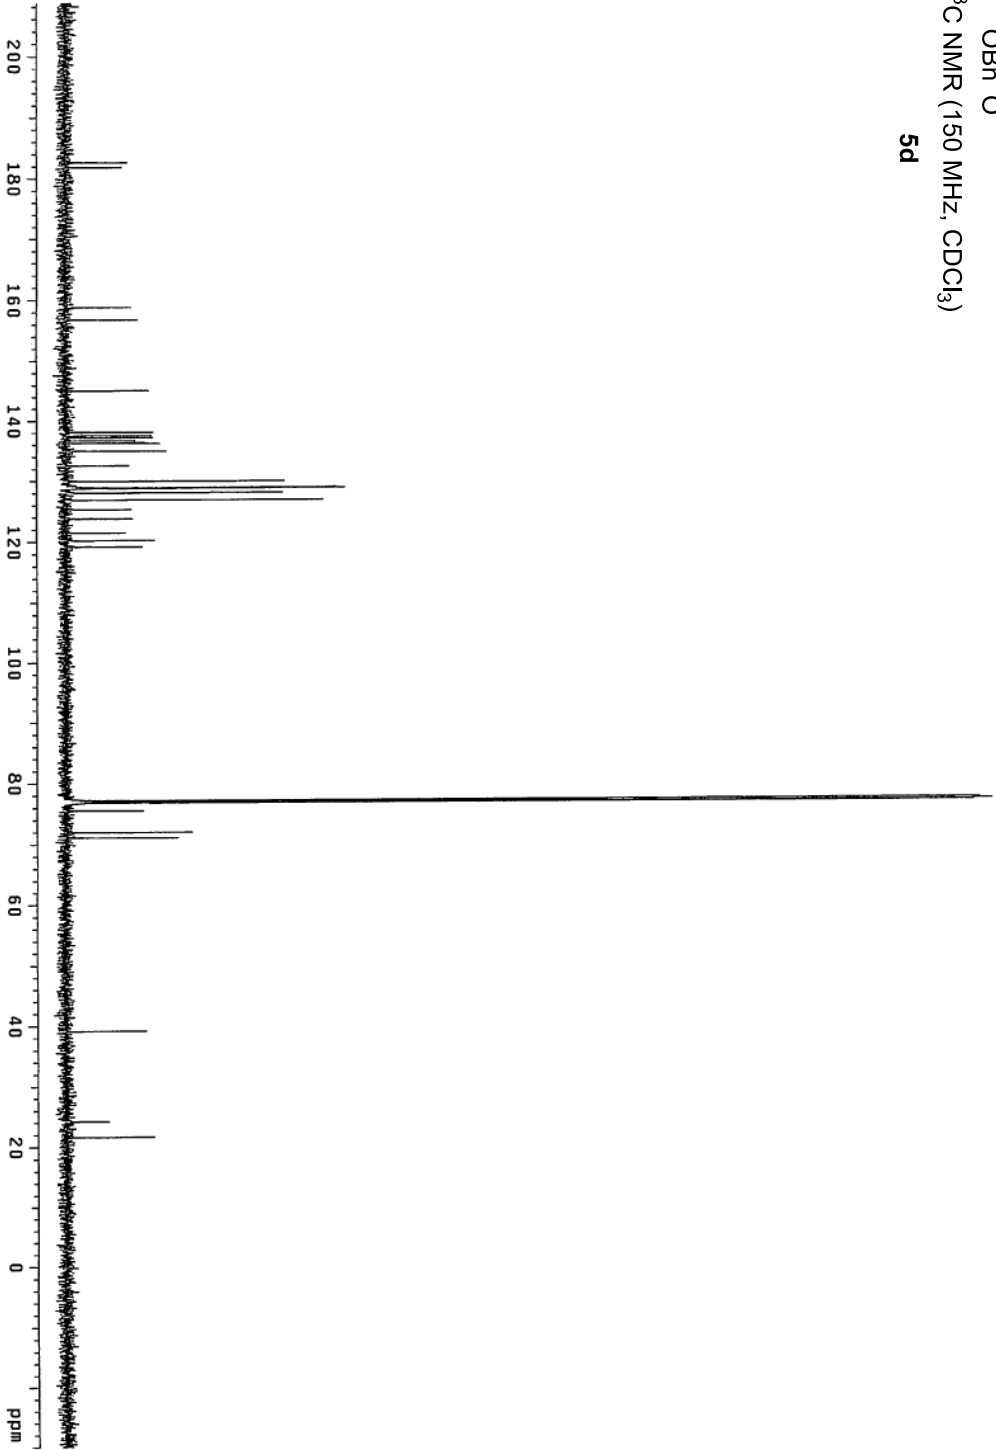

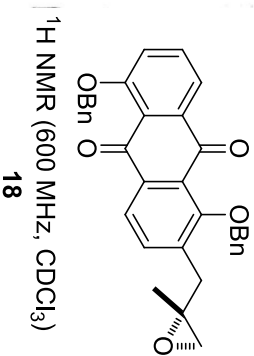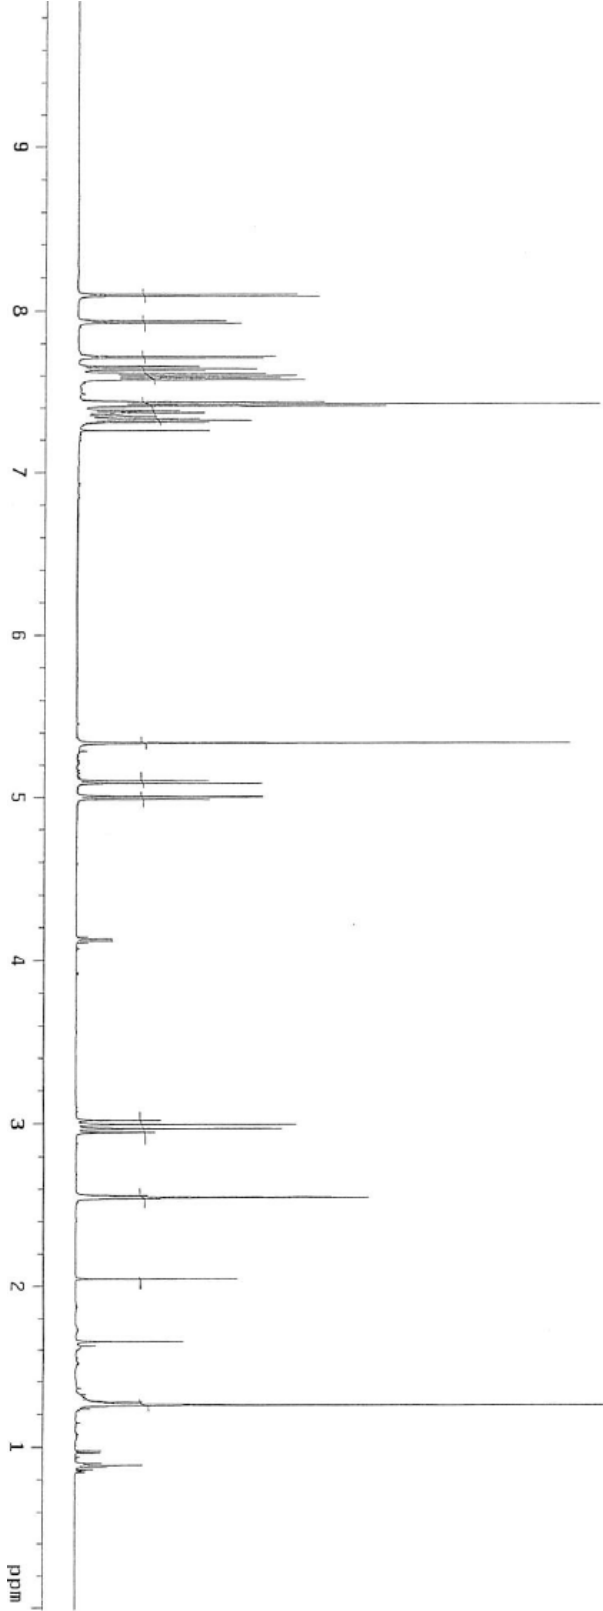

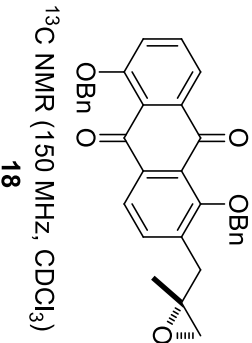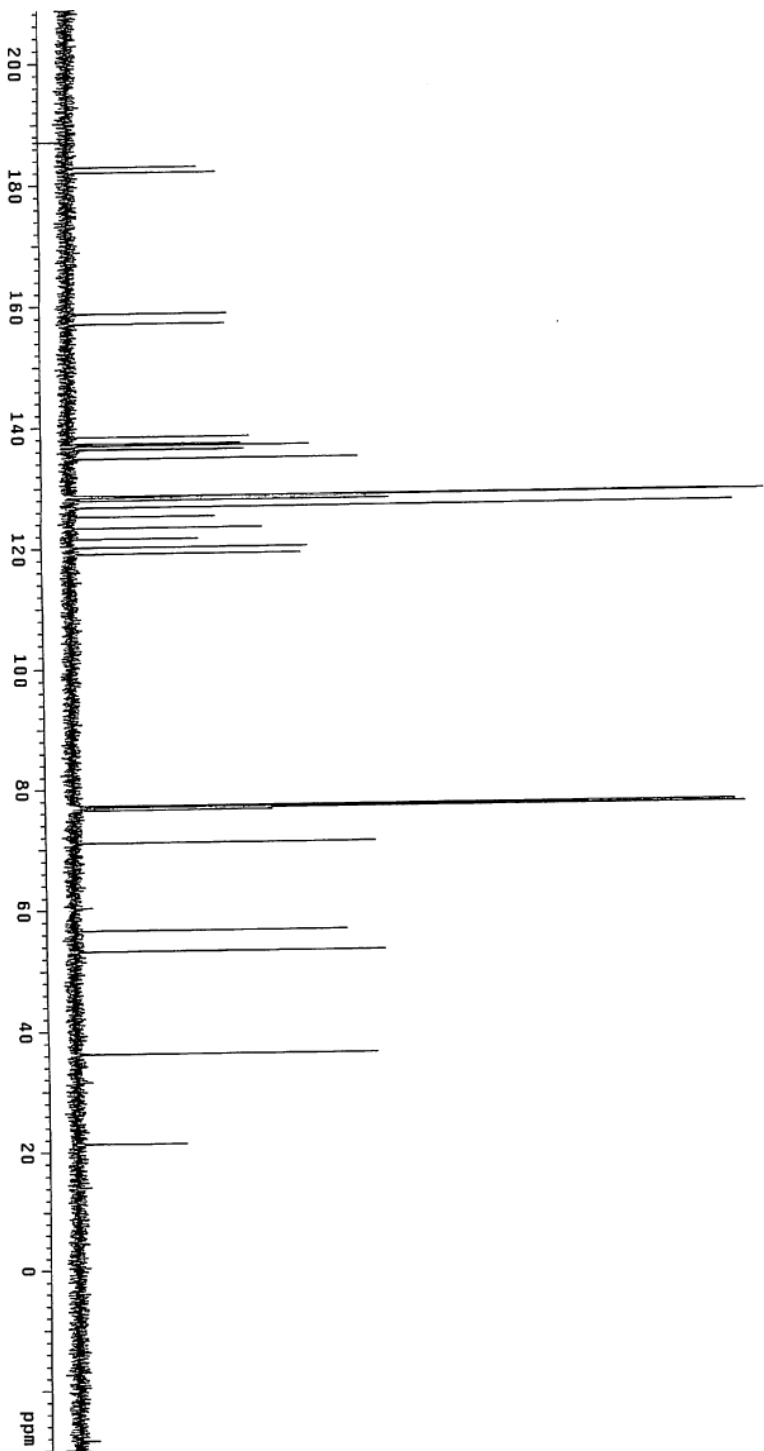

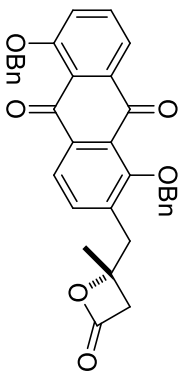

$^1\text{H}$  NMR (400 MHz,  $\text{CDCl}_3$ )

19

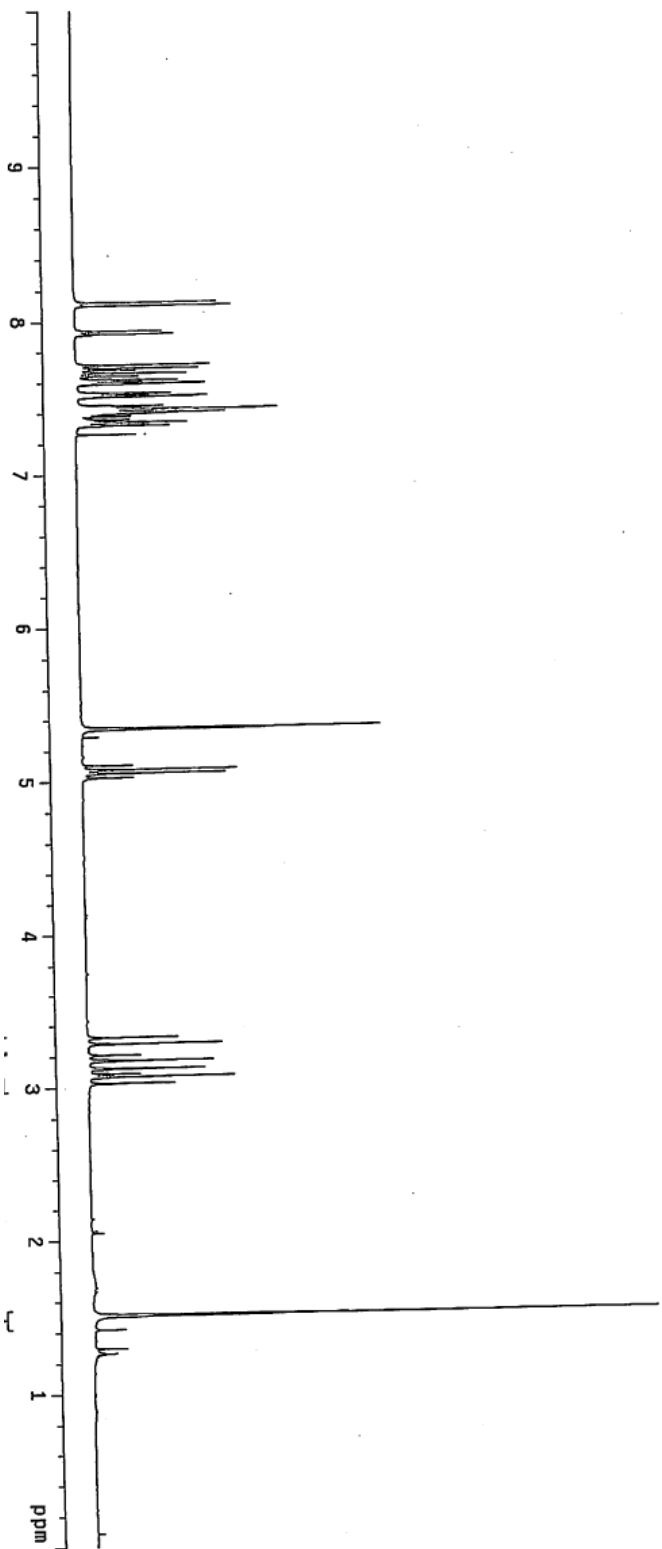

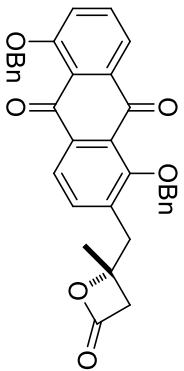

<sup>13</sup>C NMR (100 MHz, CDCl<sub>3</sub>)

19

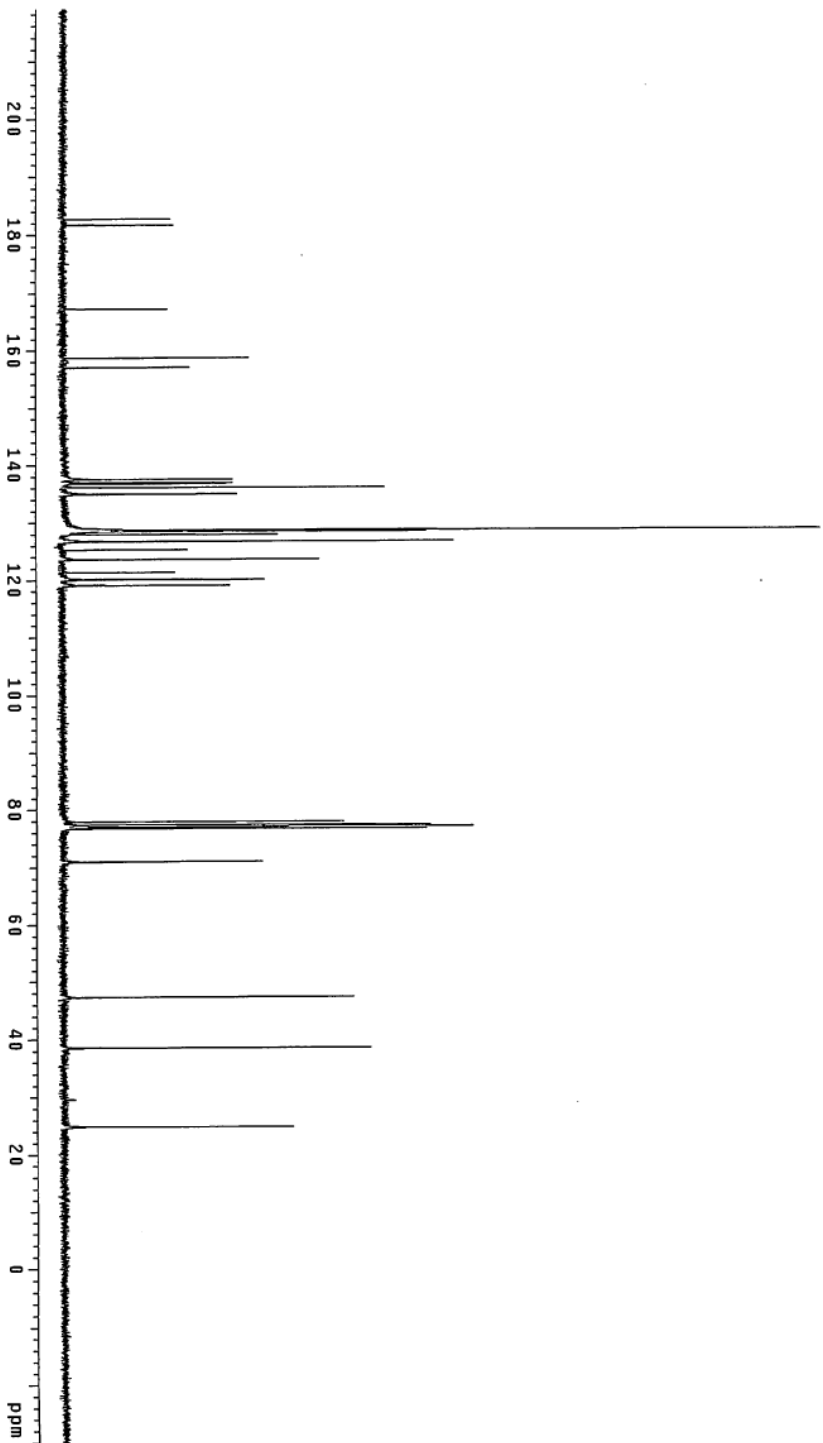



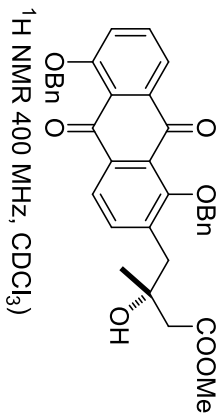

20

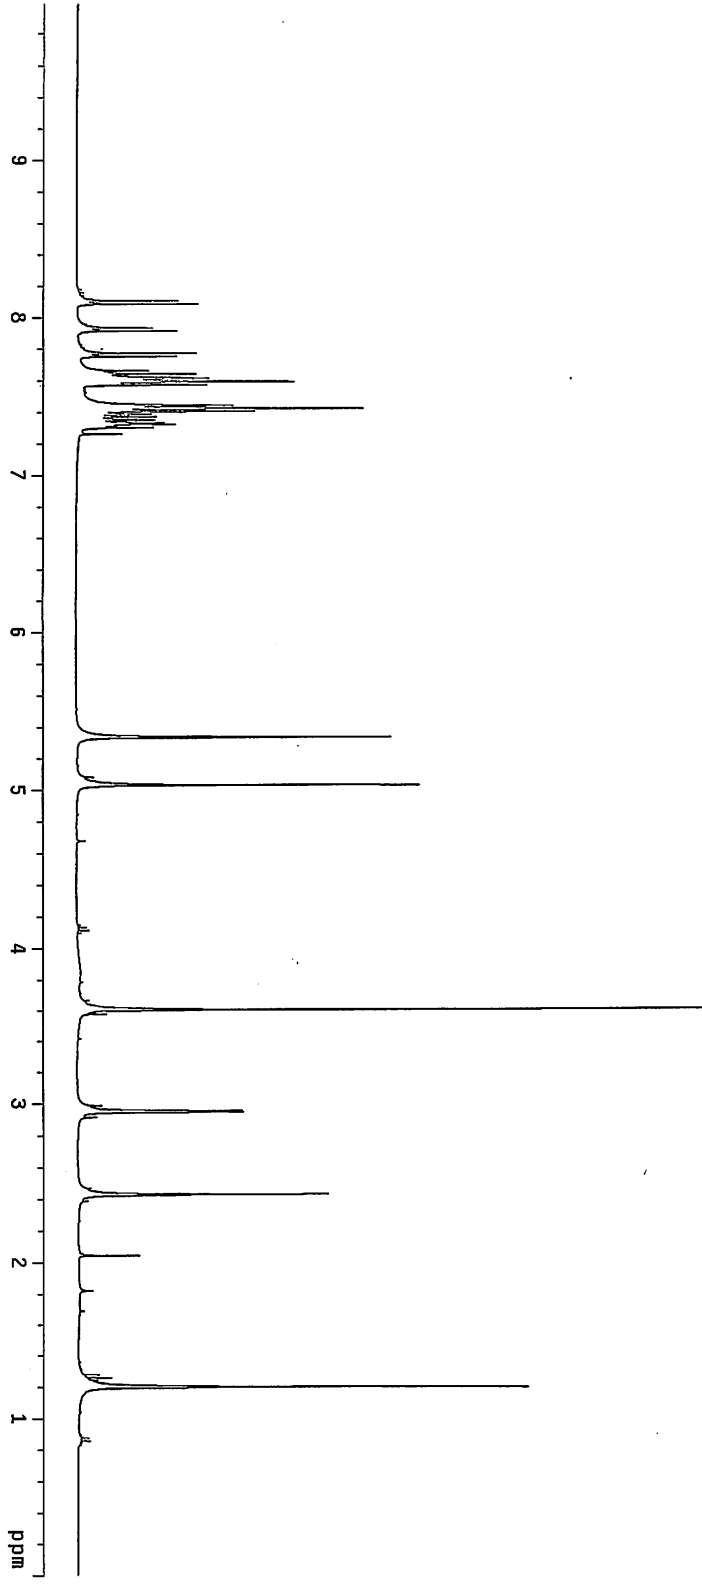

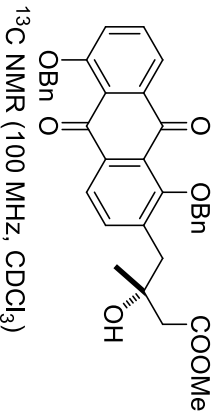

$^{13}\text{C}$  NMR (100 MHz,  $\text{CDCl}_3$ )

20

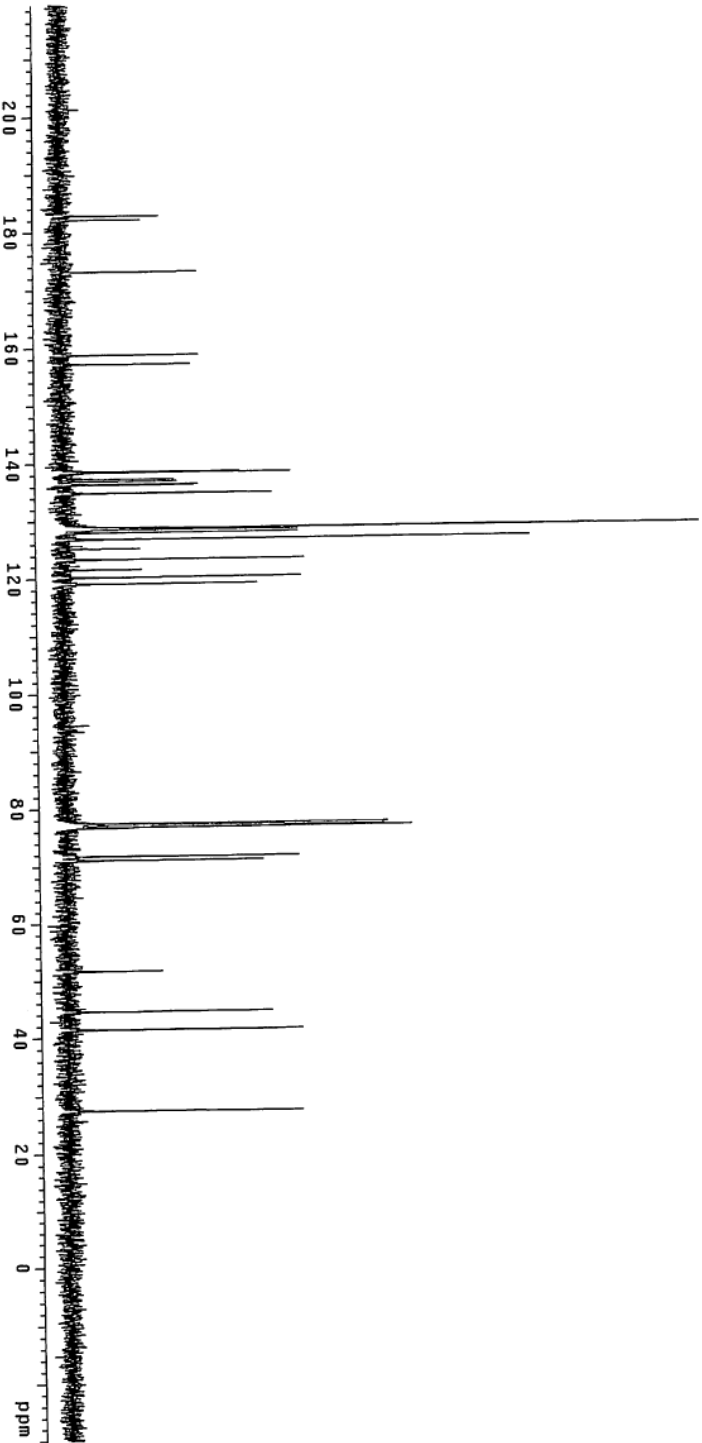

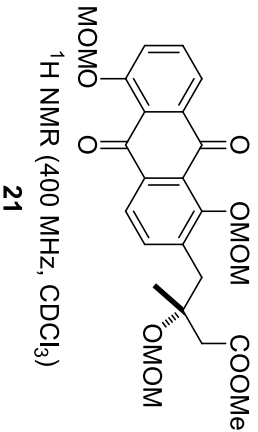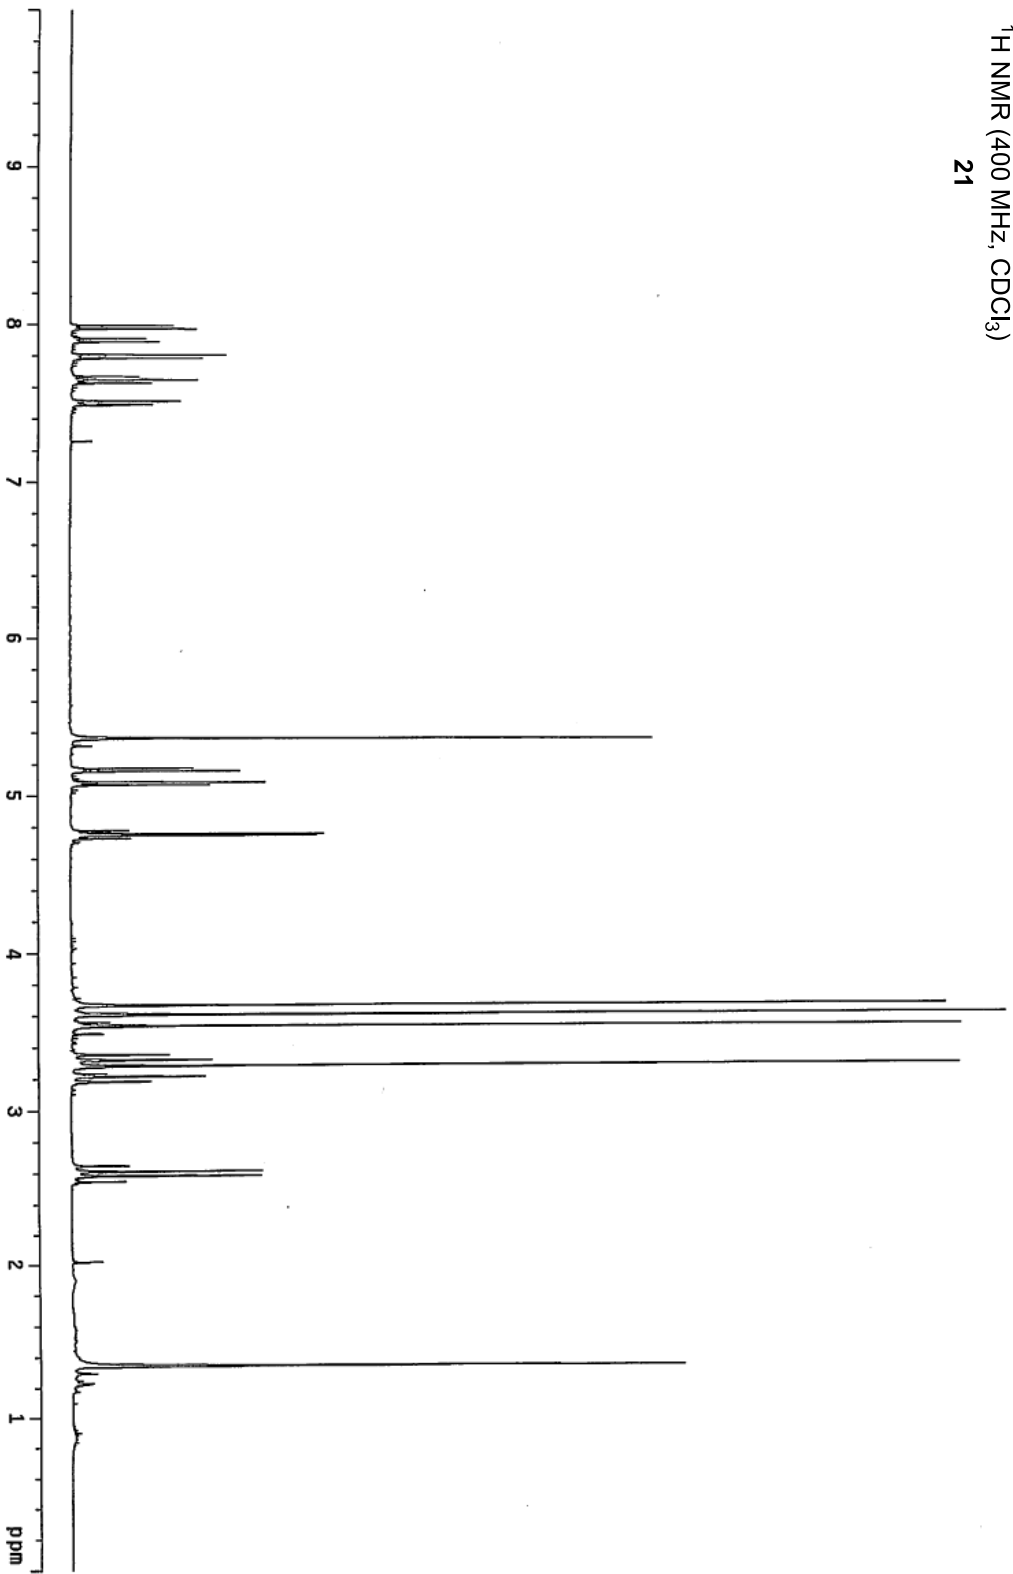

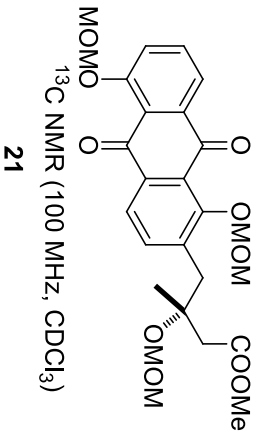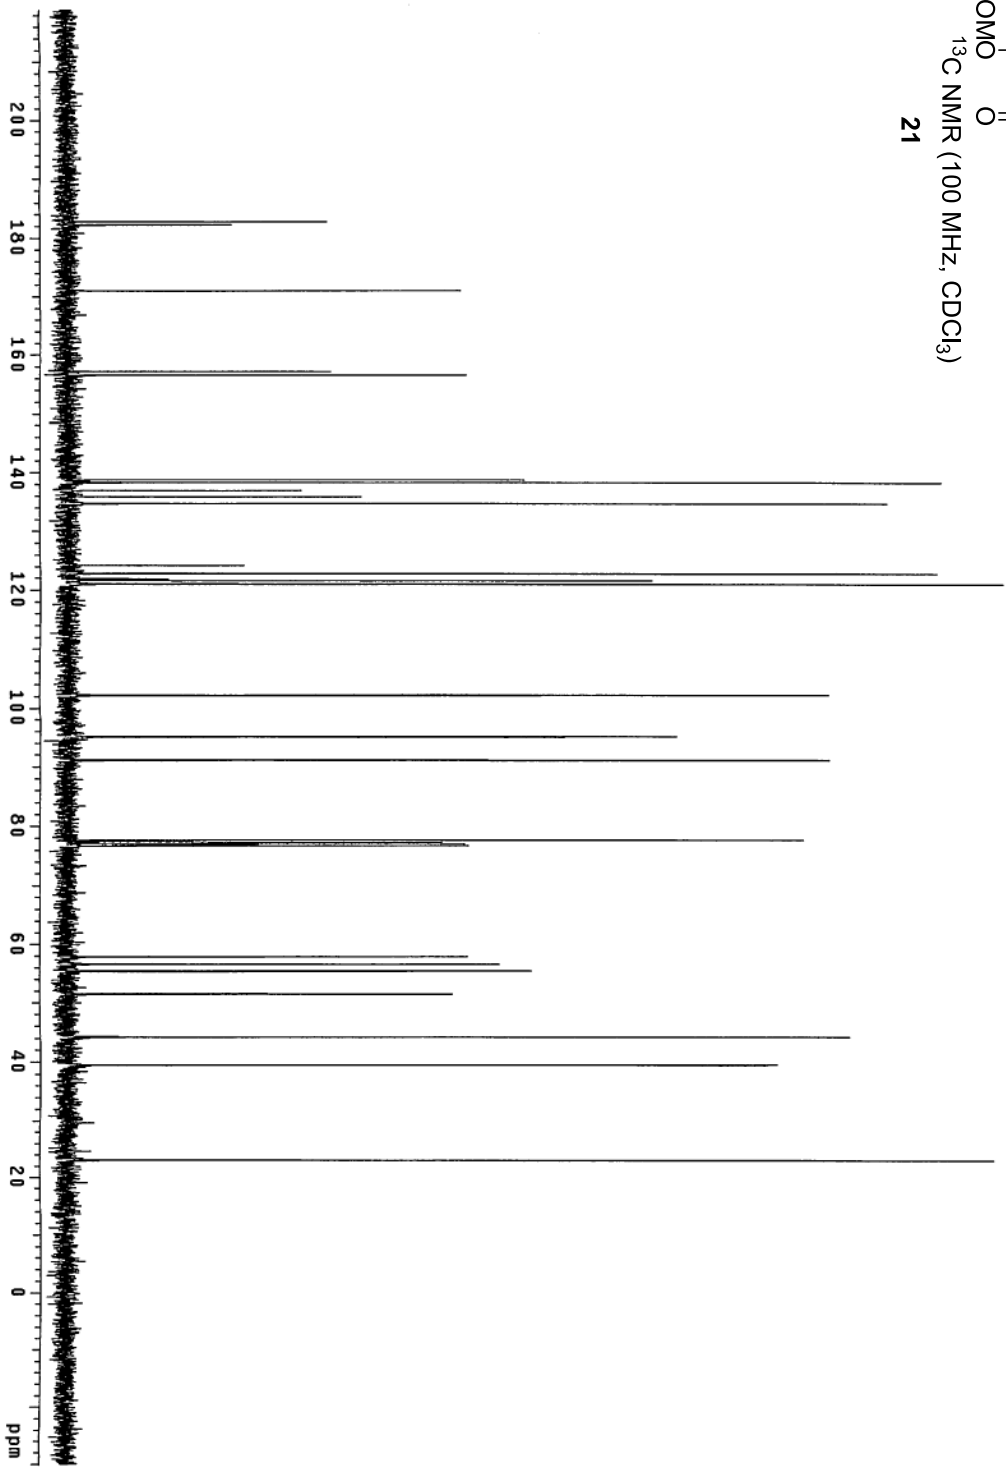

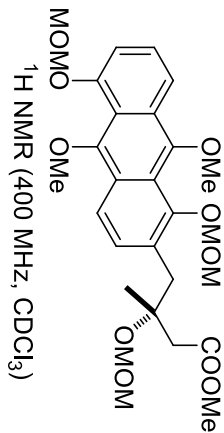

**22**

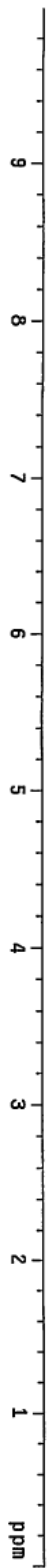

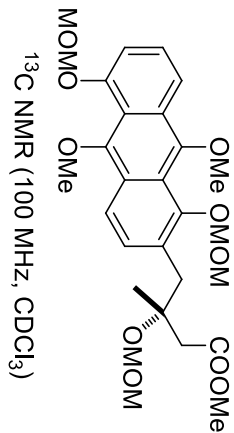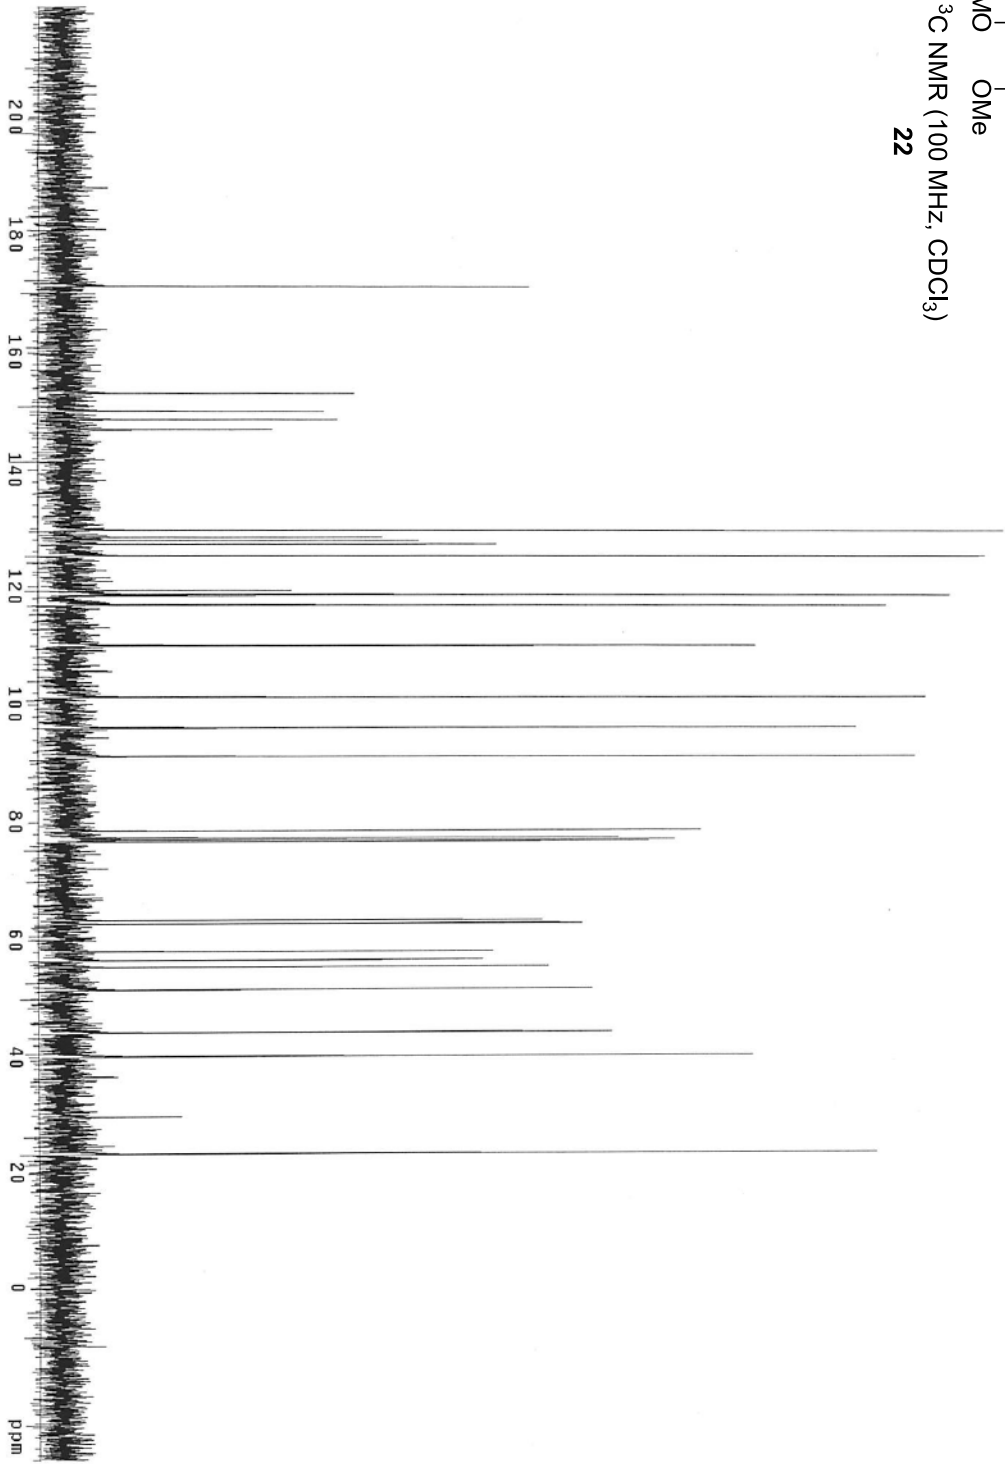

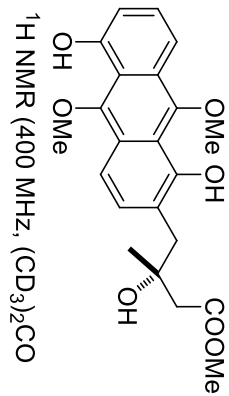

<sup>1</sup>H NMR (400 MHz, (CD<sub>3</sub>)<sub>2</sub>CO

23

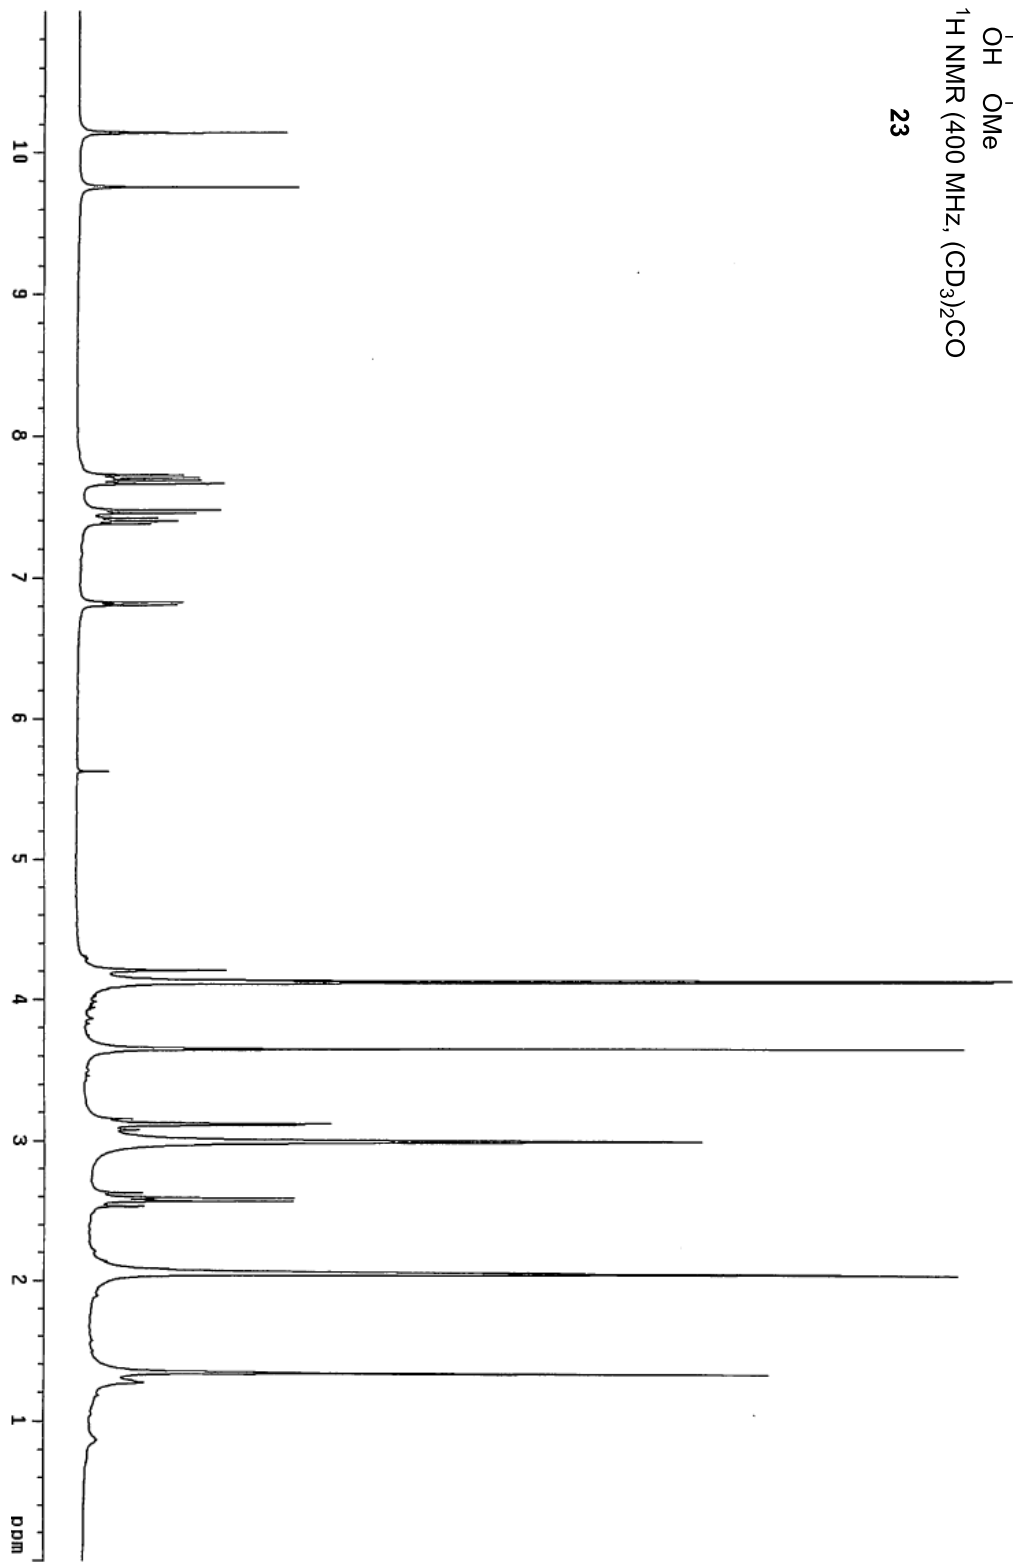

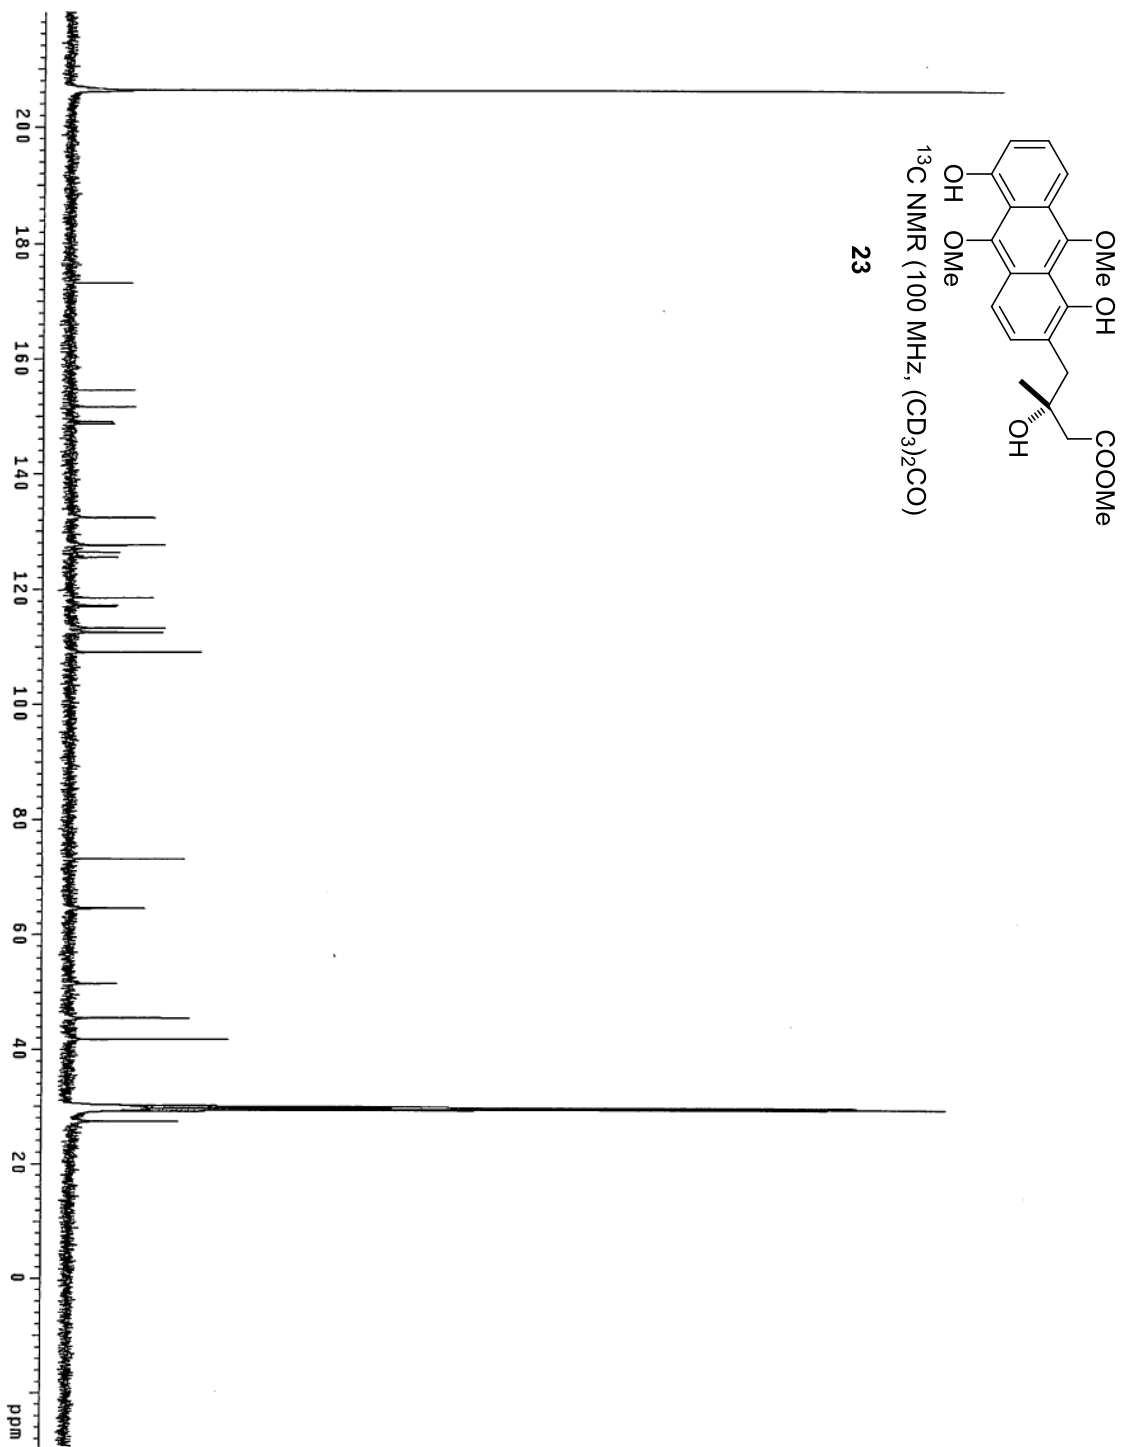



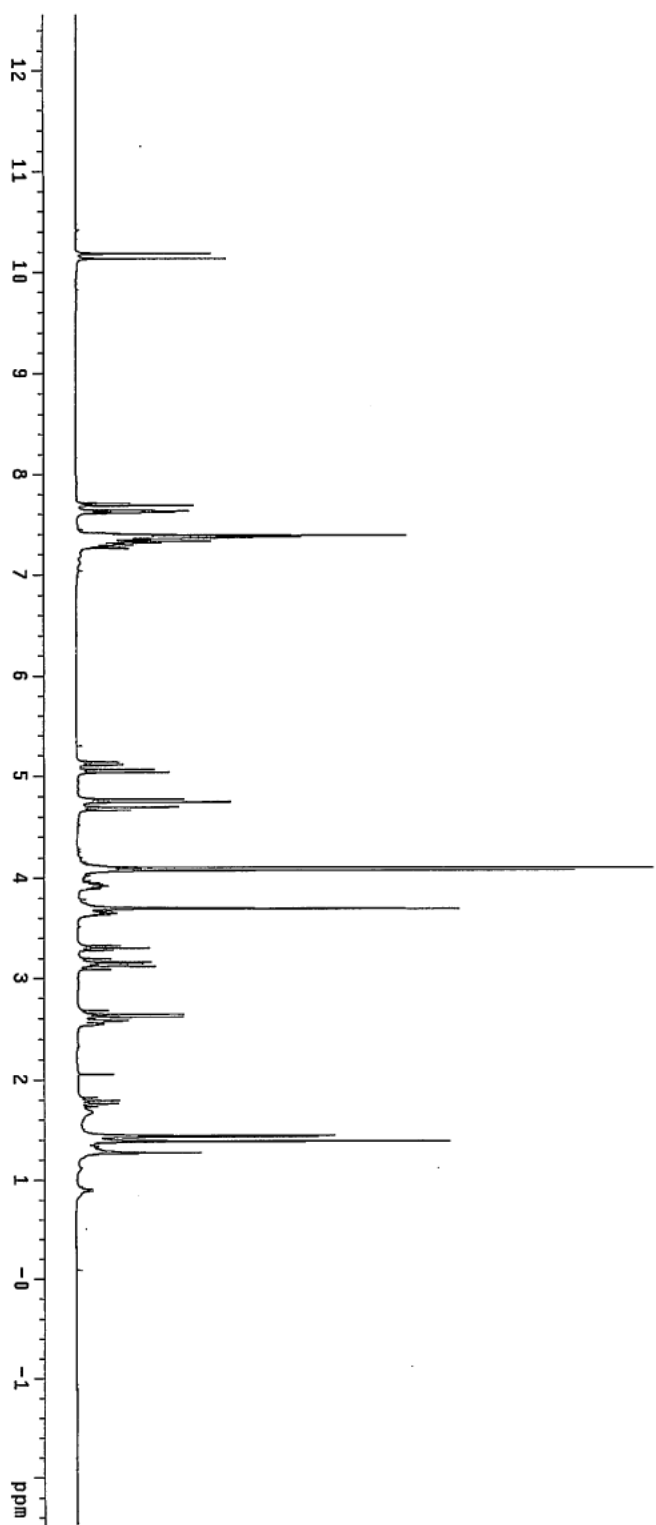

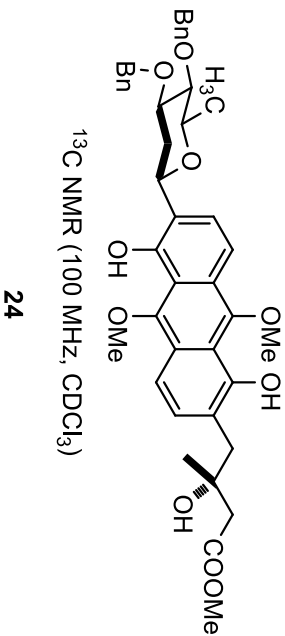

24

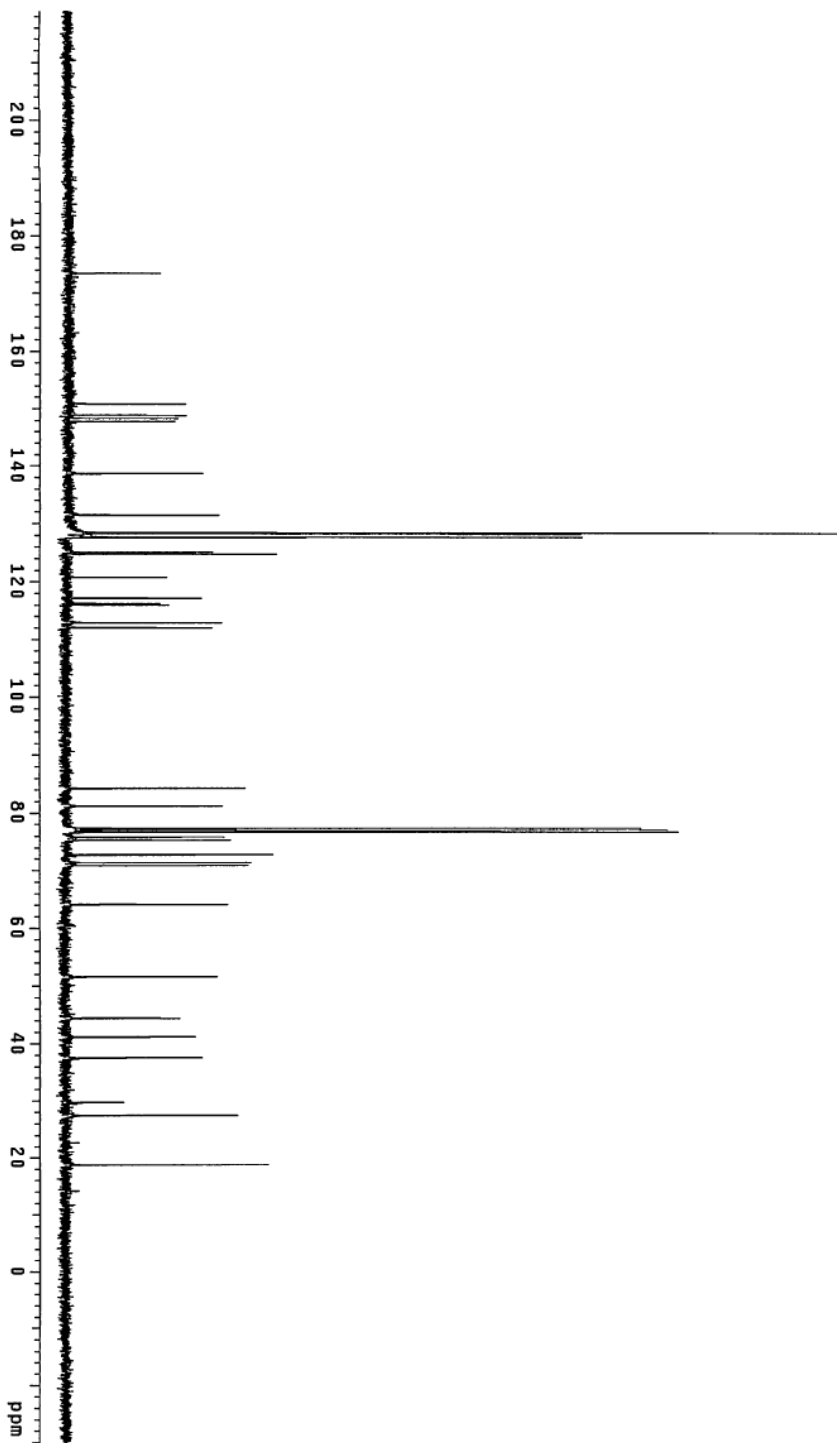

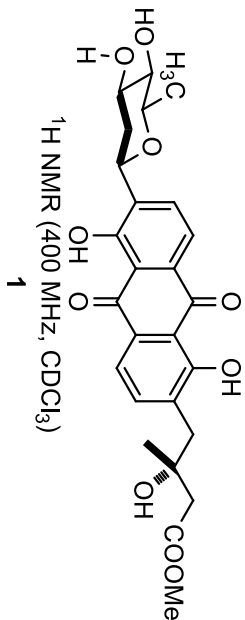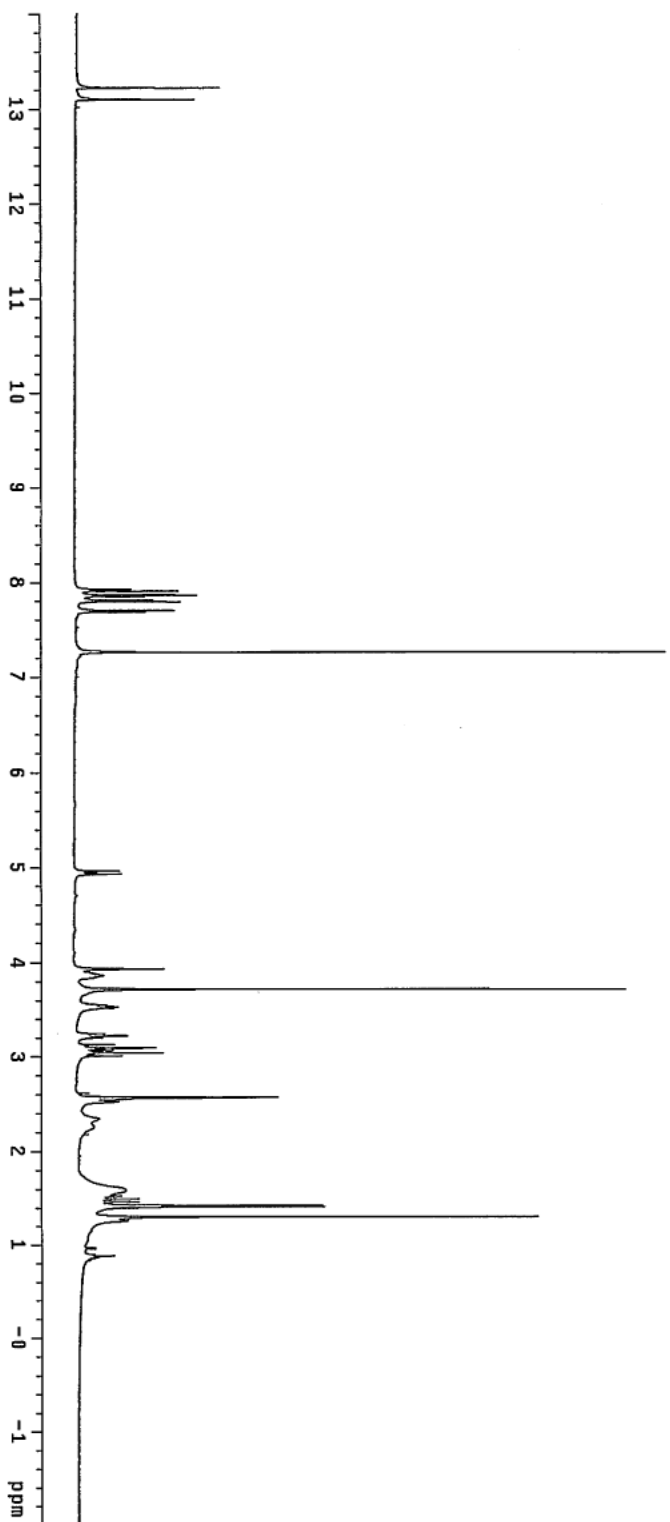

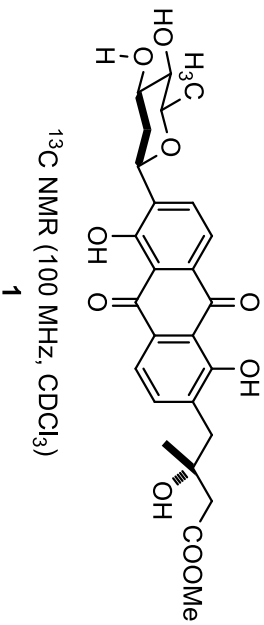

$^{13}\text{C}$  NMR (100 MHz,  $\text{CDCl}_3$ )

1

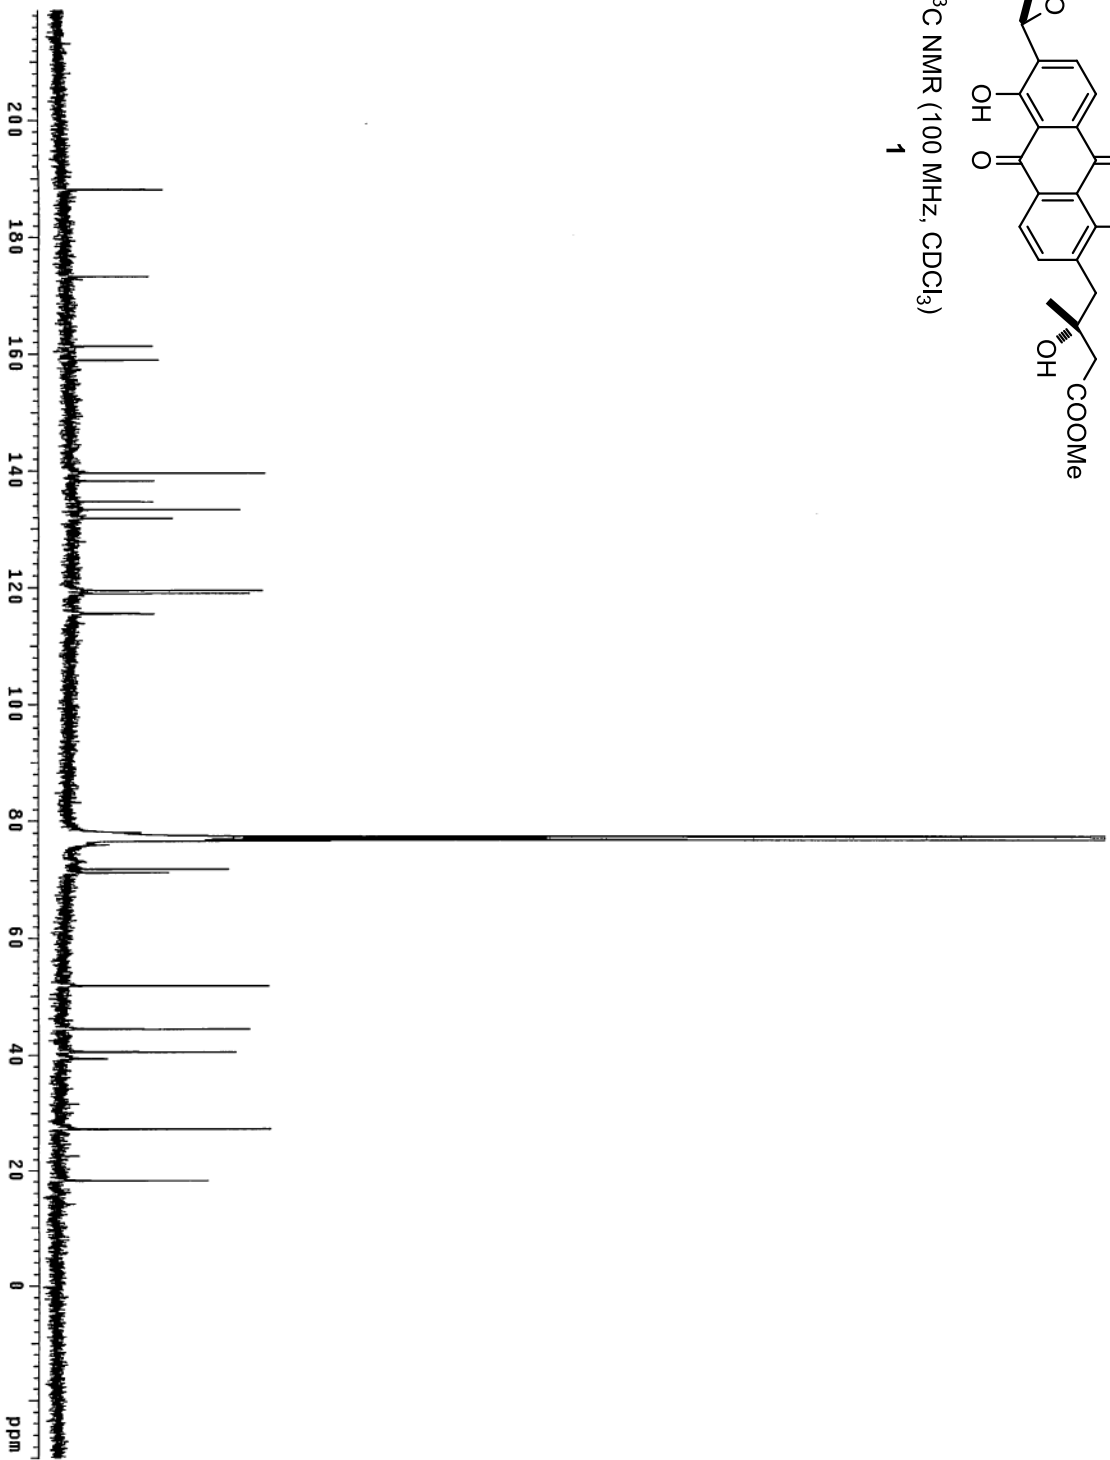

Supplement: c3cc44050h_2.pdf [file c3cc44050h_2.pdf]
